# Supplementary material
Source: publisher figshare collection journal article supplement (https://gsajournals.figshare.com/ndownloader/files/14393726)
Supplement: Supplementary file 1 [file 14393726]

## Sheet: All Output
Supplemental Table S2:
Gene	baseMean	log2FoldChange	lfcSE	stat	pvalue	padj
Gene.315023::CIGENEomyV6.78087.1::g.315023::m.315023	90.5384	-1.72057	0.25275	-6.80741	9.93735e-12	3.43137e-07
Gene.347121::CIGENEomyV6.84590.1::g.347121::m.347121	226.97	-1.42722	0.216804	-6.583	4.61063e-11	7.96026e-07
Gene.311100::CIGENEomyV6.75810.3::g.311100::m.311100	37.4222	-1.67091	0.271781	-6.14799	7.84695e-10	9.03183e-06
Gene.780::CIGENEomyV6.2904.1::g.780::m.780	731.603	-1.56026	0.26019	-5.99662	2.01467e-09	1.73916e-05
Gene.83416::CIGENEomyV6.22084.1::g.83416::m.83416	70.0238	-1.50483	0.253374	-5.93914	2.86518e-09	1.9787e-05
Gene.352742::CIGENEomyV6.87123.1::g.352742::m.352742	75.5997	-1.44418	0.251311	-5.74658	9.10663e-09	5.24086e-05
Gene.150914::CIGENEomyV6.39104.1::g.150914::m.150914	721.031	-0.923669	0.164844	-5.60328	2.10332e-08	8.4173e-05
Gene.48630::CIGENEomyV6.13794.1::g.48630::m.48630	287.519	-1.23528	0.220745	-5.59597	2.19391e-08	8.4173e-05
Gene.8413::CIGENEomyV6.1553.1::g.8413::m.8413	107.736	-1.46682	0.261781	-5.60325	2.10364e-08	8.4173e-05
Gene.94322::CIGENEomyV6.25847.1::g.94322::m.94322	145.619	-1.44533	0.259584	-5.56789	2.57849e-08	8.90352e-05
Gene.299419::CIGENEomyV6.74105.1::g.299419::m.299419	187.035	-1.50261	0.274092	-5.48214	4.20218e-08	0.00013191
Gene.117332::CIGENEomyV6.26824.4::g.117332::m.117332	517.161	-1.10559	0.210032	-5.26393	1.41007e-07	0.000348631
Gene.202204::CIGENEomyV6.50336.1::g.202204::m.202204	209.662	-1.38448	0.263035	-5.26348	1.4135e-07	0.000348631
Gene.353603::CIGENEomyV6.87689.1::g.353603::m.353603	103.147	-1.34519	0.254545	-5.28469	1.25914e-07	0.000348631
Gene.370060::CIGENEomyV6.98663.1::g.370060::m.370060	332.306	-1.45876	0.278325	-5.2412	1.59535e-07	0.000367249
Gene.187547::CIGENEomyV6.46204.1::g.187547::m.187547	146.992	-1.41609	0.271995	-5.20632	1.92626e-07	0.00041571
Gene.160388::CIGENEomyV6.38697.1::g.160388::m.160388	45.4264	-1.36628	0.26465	-5.16257	2.43579e-07	0.000494752
Gene.108358::CIGENEomyV6.29443.1::g.108358::m.108358	508.723	-0.97637	0.190465	-5.12624	2.95588e-07	0.000567037
Gene.173297::CIGENEomyV6.42885.1::g.173297::m.173297	77.2729	-1.33078	0.260392	-5.11067	3.21023e-07	0.000574074
Gene.198156::CIGENEomyV6.48935.1::g.198156::m.198156	72.4305	-1.2194	0.239943	-5.08204	3.73397e-07	0.000574074
Gene.231945::CIGENEomyV6.55417.4::g.231945::m.231945	891.521	1.22401	0.240786	5.08338	3.70768e-07	0.000574074
Gene.254581::CIGENEomyV6.63123.1::g.254581::m.254581	894.033	-0.698007	0.136772	-5.10343	3.33552e-07	0.000574074
Gene.254597::CIGENEomyV6.62876.3::g.254597::m.254597	92.4882	-1.27967	0.252027	-5.07752	3.82383e-07	0.000574074
Gene.222284::CIGENEomyV6.56200.2::g.222284::m.222284	1418.11	-0.754412	0.149716	-5.03897	4.68054e-07	0.000599036
Gene.261617::CIGENEomyV6.62459.1::g.261617::m.261617	161.093	-1.35938	0.269006	-5.05334	4.34146e-07	0.000599036
Gene.264738::CIGENEomyV6.66102.1::g.264738::m.264738	29.8376	-1.32826	0.263074	-5.04901	4.44107e-07	0.000599036
Gene.8104::CIGENEomyV6.386.1::g.8104::m.8104	430.414	-1.20253	0.238652	-5.03882	4.68403e-07	0.000599036
Gene.121085::CIGENEomyV6.28531.1::g.121085::m.121085	971.543	-1.09846	0.219834	-4.99678	5.82951e-07	0.000718904
Gene.281874::CIGENEomyV6.69604.2::g.281874::m.281874	293.474	-0.955842	0.192302	-4.97052	6.6775e-07	0.000795083
Gene.130846::CIGENEomyV6.30417.1::g.130846::m.130846	140.224	-1.2889	0.260504	-4.94772	7.50893e-07	0.000864278
Gene.171784::CIGENEomyV6.41911.1::g.171784::m.171784	6.93383	1.29815	0.263098	4.9341	8.05225e-07	0.000887191
Gene.40600::CIGENEomyV6.9350.2::g.40600::m.40600	82.6845	1.22046	0.247859	4.92401	8.4788e-07	0.000887191
Gene.55028::CIGENEomyV6.12506.1::g.55028::m.55028	102.171	-1.16424	0.236387	-4.92516	8.42915e-07	0.000887191
Gene.4378::CIGENEomyV6.2169.1::g.4378::m.4378	654.953	-1.21482	0.247404	-4.91028	9.09446e-07	0.000923623
Gene.317388::CIGENEomyV6.78989.1::g.317388::m.317388	80.4551	-1.33758	0.274088	-4.88013	1.06017e-06	0.00104594
Gene.67209::CIGENEomyV6.16894.1::g.67209::m.67209	96.728	-1.26199	0.260027	-4.85329	1.21429e-06	0.00116471
Gene.251612::CIGENEomyV6.61242.1::g.251612::m.251612	23.665	-1.34785	0.279894	-4.81556	1.46791e-06	0.00136992
Gene.141665::CIGENEomyV6.34822.1::g.141665::m.141665	136.274	-0.852619	0.179327	-4.75454	1.98899e-06	0.0018064
Gene.144980::CIGENEomyV6.35187.1::g.144980::m.144980	39.1411	-1.22867	0.258979	-4.74427	2.09256e-06	0.0018064
Gene.242964::CIGENEomyV6.60053.1::g.242964::m.242964	269.991	-1.08012	0.227428	-4.74926	2.04162e-06	0.0018064
Gene.328865::CIGENEomyV6.80429.1::g.328865::m.328865	107.489	-1.21588	0.257453	-4.72274	2.32685e-06	0.001913
Gene.61398::CIGENEomyV6.16831.1::g.61398::m.61398	183.727	-0.897626	0.190049	-4.72314	2.32234e-06	0.001913
Gene.313113::CIGENEomyV6.76793.1::g.313113::m.313113	832.731	-0.853202	0.1814	-4.70342	2.5584e-06	0.00205446
Gene.213744::CIGENEomyV6.52386.1::g.213744::m.213744	641.652	-0.770956	0.164349	-4.69097	2.71911e-06	0.00213388
Gene.286633::CIGENEomyV6.69535.1::g.286633::m.286633	2797.11	-1.02974	0.219885	-4.6831	2.82567e-06	0.00216823
Gene.10724::CIGENEomyV6.329.1::g.10724::m.10724	26.1096	-1.21304	0.259474	-4.67498	2.93976e-06	0.00220674
Gene.144495::CIGENEomyV6.34031.1::g.144495::m.144495	32.197	-1.28016	0.275274	-4.65051	3.31122e-06	0.00243269
Gene.337736::CIGENEomyV6.82915.1::g.337736::m.337736	24.8215	-1.22961	0.265321	-4.63442	3.57937e-06	0.00257491
Gene.217939::CIGENEomyV6.51530.2::g.217939::m.217939	107.298	0.828775	0.179288	4.6226	3.78961e-06	0.00263492
Gene.246966::CIGENEomyV6.59872.1::g.246966::m.246966	698.176	-0.877638	0.189916	-4.62119	3.81541e-06	0.00263492
Gene.156094::CIGENEomyV6.38361.7::g.156094::m.156094	46.2642	-1.24261	0.270641	-4.59137	4.40354e-06	0.00298146
Gene.183016::CIGENEomyV6.45490.1::g.183016::m.183016	6027.59	-1.13853	0.248683	-4.57825	4.68892e-06	0.00311362
Gene.67646::CIGENEomyV6.16450.1::g.67646::m.67646	128.848	-1.22607	0.268365	-4.56866	4.90856e-06	0.00319797
Gene.63684::CIGENEomyV6.16779.1::g.63684::m.63684	1001.21	0.876362	0.192461	4.55345	5.27727e-06	0.00337452
Gene.155932::CIGENEomyV6.39230.1::g.155932::m.155932	44.1657	-1.26233	0.277716	-4.5454	5.48318e-06	0.00344244
Gene.362734::CIGENEomyV6.93025.6::g.362734::m.362734	95.9336	-1.04616	0.230783	-4.53311	5.81221e-06	0.00358385
Gene.265827::CIGENEomyV6.66181.1::g.265827::m.265827	44.407	-1.12539	0.248999	-4.51967	6.19359e-06	0.00375201
Gene.117312::CIGENEomyV6.27074.3::g.117312::m.117312	43.4326	-1.24011	0.275211	-4.50605	6.60459e-06	0.00383048
Gene.266345::CIGENEomyV6.64803.1::g.266345::m.266345	105.141	-0.902974	0.200324	-4.50756	6.55771e-06	0.00383048
Gene.325087::CIGENEomyV6.76933.1::g.325087::m.325087	12.5699	1.25574	0.278781	4.50441	6.65591e-06	0.00383048
Gene.251346::CIGENEomyV6.62331.1::g.251346::m.251346	91.2361	-1.21092	0.269434	-4.4943	6.97986e-06	0.00395106
Gene.145738::CIGENEomyV6.35009.1::g.145738::m.145738	65.0289	-0.856975	0.192391	-4.45435	8.41496e-06	0.00441477
Gene.234381::CIGENEomyV6.56309.1::g.234381::m.234381	157.244	-0.931343	0.208932	-4.45763	8.28699e-06	0.00441477
Gene.235206::CIGENEomyV6.55841.2::g.235206::m.235206	215.385	-0.9119	0.204658	-4.45572	8.36106e-06	0.00441477
Gene.311639::CIGENEomyV6.75249.1::g.311639::m.311639	382.524	-0.607118	0.136316	-4.45375	8.43831e-06	0.00441477
Gene.46071::CIGENEomyV6.9597.1::g.46071::m.46071	193.581	-0.926354	0.207498	-4.46439	8.02966e-06	0.00441477
Gene.228666::CIGENEomyV6.56165.4::g.228666::m.228666	153.064	-1.06841	0.24014	-4.44912	8.62241e-06	0.00444376
Gene.56295::CIGENEomyV6.13824.1::g.56295::m.56295	727.251	-1.2355	0.278626	-4.43426	9.23888e-06	0.00469145
Gene.143552::CIGENEomyV6.34767.1::g.143552::m.143552	398.211	0.778851	0.176218	4.41982	9.87819e-06	0.00476354
Gene.147764::CIGENEomyV6.34958.1::g.147764::m.147764	162.396	-0.822861	0.185935	-4.42554	9.62029e-06	0.00476354
Gene.369572::CIGENEomyV6.98267.10::g.369572::m.369572	171.074	0.842082	0.190575	4.41863	9.93267e-06	0.00476354
Gene.72260::CIGENEomyV6.15976.1::g.72260::m.72260	86.7284	-1.00088	0.226468	-4.41954	9.89108e-06	0.00476354
Gene.27542::CIGENEomyV6.6788.1::g.27542::m.27542	238.212	-1.16257	0.263499	-4.41205	1.02398e-05	0.00484357
Gene.153956::CIGENEomyV6.37959.1::g.153956::m.153956	112.192	-1.0861	0.246552	-4.40513	1.05718e-05	0.00486725
Gene.199255::CIGENEomyV6.48038.1::g.199255::m.199255	57.5627	-1.21378	0.276071	-4.39663	1.09946e-05	0.00486725
Gene.256253::CIGENEomyV6.61572.1::g.256253::m.256253	438.927	0.793428	0.18043	4.39742	1.09543e-05	0.00486725
Gene.26366::CIGENEomyV6.6385.1::g.26366::m.26366	278.658	-0.895401	0.203359	-4.40305	1.0674e-05	0.00486725
Gene.6602::CIGENEomyV6.2908.1::g.6602::m.6602	103.329	-1.05152	0.239121	-4.39745	1.09531e-05	0.00486725
Gene.47319::CIGENEomyV6.13978.1::g.47319::m.47319	25809.1	-0.826972	0.189848	-4.35597	1.32479e-05	0.0057905
Gene.53597::CIGENEomyV6.14178.1::g.53597::m.53597	63.2102	-1.17842	0.270802	-4.3516	1.35151e-05	0.00583344
Gene.341574::CIGENEomyV6.84893.1::g.341574::m.341574	855.162	-1.03339	0.237688	-4.34768	1.37584e-05	0.00586517
Gene.299119::CIGENEomyV6.73424.1::g.299119::m.299119	92.6452	-1.18521	0.273033	-4.3409	1.41897e-05	0.00597526
Gene.117738::CIGENEomyV6.29053.1::g.117738::m.117738	279.076	-0.92472	0.21324	-4.33653	1.44751e-05	0.00602197
Gene.358300::CIGENEomyV6.89183.1::g.358300::m.358300	315.334	-0.827712	0.191685	-4.31808	1.57394e-05	0.00647002
Gene.30248::CIGENEomyV6.10734.1::g.30248::m.30248	52.9197	-1.09498	0.254515	-4.30221	1.69106e-05	0.00677592
Gene.352270::CIGENEomyV6.87031.1::g.352270::m.352270	57.2188	-1.16072	0.269718	-4.30348	1.68138e-05	0.00677592
Gene.58217::CIGENEomyV6.12696.1::g.58217::m.58217	166.209	-0.812343	0.188913	-4.3001	1.70722e-05	0.00677592
Gene.103503::CIGENEomyV6.25397.2::g.103503::m.103503	136.833	-1.20023	0.279524	-4.29384	1.75611e-05	0.00689075
Gene.104344::CIGENEomyV6.25952.1::g.104344::m.104344	88.3823	-1.06168	0.24854	-4.27166	1.94024e-05	0.00752768
Gene.317411::CIGENEomyV6.77838.3::g.317411::m.317411	21.5407	-1.1756	0.275682	-4.26432	2.00512e-05	0.00769297
Gene.31816::CIGENEomyV6.10236.1::g.31816::m.31816	25.1359	-1.19177	0.279943	-4.25719	2.07015e-05	0.0078552
Gene.238055::CIGENEomyV6.58881.1::g.238055::m.238055	57.3422	-1.04227	0.245117	-4.25211	2.11762e-05	0.00786251
Gene.340725::CIGENEomyV6.85074.1::g.340725::m.340725	27.3229	-1.17267	0.275659	-4.25408	2.09909e-05	0.00786251
Gene.1029::CIGENEomyV6.2550.1::g.1029::m.1029	567.282	0.671378	0.158633	4.23228	2.31331e-05	0.00828173
Gene.143710::CIGENEomyV6.34699.1::g.143710::m.143710	145.449	-0.873124	0.206476	-4.2287	2.35045e-05	0.00828173
Gene.223662::CIGENEomyV6.56162.5::g.223662::m.223662	777.569	0.549817	0.129764	4.23707	2.2646e-05	0.00828173
Gene.318226::CIGENEomyV6.78801.1::g.318226::m.318226	142.563	-0.921546	0.217917	-4.22889	2.34843e-05	0.00828173
Gene.325090::CIGENEomyV6.78308.1::g.325090::m.325090	31.5108	-1.11411	0.263219	-4.23264	2.30964e-05	0.00828173
Gene.330978::CIGENEomyV6.80999.1::g.330978::m.330978	56.9338	1.15285	0.273004	4.22283	2.41258e-05	0.00841479
Gene.311119::CIGENEomyV6.75460.1::g.311119::m.311119	28.181	-1.17629	0.27887	-4.21806	2.46409e-05	0.00849973
Gene.322324::CIGENEomyV6.78038.1::g.322324::m.322324	115.595	-1.1023	0.261537	-4.21469	2.50117e-05	0.00849973
Gene.61672::CIGENEomyV6.18878.4::g.61672::m.61672	36.3299	-1.17903	0.2798	-4.21383	2.51078e-05	0.00849973
Gene.8366::CIGENEomyV6.2911.1::g.8366::m.8366	130.146	-1.14065	0.271026	-4.20865	2.56897e-05	0.00861229
Gene.247654::CIGENEomyV6.58861.1::g.247654::m.247654	34.1757	-1.14713	0.27299	-4.2021	2.64454e-05	0.00878037
Gene.2780::CIGENEomyV6.2526.1::g.2780::m.2780	78.4533	-0.89704	0.213918	-4.19338	2.74826e-05	0.00895994
Gene.29756::CIGENEomyV6.3716.1::g.29756::m.29756	216.06	0.648869	0.154743	4.1932	2.75052e-05	0.00895994
Gene.65073::CIGENEomyV6.18070.1::g.65073::m.65073	85.5509	-0.93688	0.224132	-4.18003	2.91469e-05	0.00940599
Gene.200736::CIGENEomyV6.48949.17::g.200736::m.200736	115.195	0.999105	0.239231	4.17631	2.96272e-05	0.00947249
Gene.24183::CIGENEomyV6.5505.1::g.24183::m.24183	684.393	-0.642358	0.153936	-4.17288	3.00775e-05	0.00952821
Gene.163315::CIGENEomyV6.40683.1::g.163315::m.163315	564.633	0.921729	0.221133	4.16821	3.07002e-05	0.00955025
Gene.271943::CIGENEomyV6.65637.1::g.271943::m.271943	81.9797	-1.01156	0.242656	-4.16869	3.0636e-05	0.00955025
Gene.10205::CIGENEomyV6.1886.1::g.10205::m.10205	202.48	0.674891	0.162172	4.16156	3.16076e-05	0.00973475
Gene.44279::CIGENEomyV6.9153.1::g.44279::m.44279	96.7448	0.919684	0.22109	4.15977	3.18571e-05	0.00973475
Gene.376805::CIGENEomyV6.103849.1::g.376805::m.376805	36.7039	1.14609	0.275739	4.15643	3.23253e-05	0.00979115
Gene.1975::CIGENEomyV6.545.1::g.1975::m.1975	36.9052	-0.988388	0.238073	-4.15162	3.30136e-05	0.0099127
Gene.357833::CIGENEomyV6.88845.2::g.357833::m.357833	16.2628	-1.15247	0.278329	-4.14069	3.4627e-05	0.0102194
Gene.44392::CIGENEomyV6.9900.1::g.44392::m.44392	253.684	-0.852185	0.205716	-4.14253	3.4349e-05	0.0102194
Gene.8006::CIGENEomyV6.2540.1::g.8006::m.8006	458.931	0.82993	0.200808	4.13296	3.58122e-05	0.0104796
Gene.294503::CIGENEomyV6.71542.1::g.294503::m.294503	69.2812	-0.851581	0.20649	-4.12408	3.72212e-05	0.0108004
Gene.95684::CIGENEomyV6.24916.1::g.95684::m.95684	173.706	0.97317	0.236098	4.12189	3.75769e-05	0.0108128
Gene.47150::CIGENEomyV6.9495.1::g.47150::m.47150	100.802	-1.09956	0.267977	-4.1032	4.07468e-05	0.011628
Gene.114594::CIGENEomyV6.27016.1::g.114594::m.114594	833.616	-1.1183	0.273225	-4.09295	4.25926e-05	0.0118803
Gene.277863::CIGENEomyV6.67055.6::g.277863::m.277863	124.735	-1.08851	0.265907	-4.09356	4.24797e-05	0.0118803
Gene.325000::CIGENEomyV6.79607.2::g.325000::m.325000	34.4246	-1.14012	0.278584	-4.09256	4.26632e-05	0.0118803
Gene.116495::CIGENEomyV6.27396.1::g.116495::m.116495	307.135	-0.652989	0.159843	-4.08519	4.40399e-05	0.012096
Gene.370737::CIGENEomyV6.99098.1::g.370737::m.370737	187.13	-1.05013	0.257091	-4.08468	4.41383e-05	0.012096
Gene.129120::CIGENEomyV6.31970.1::g.129120::m.129120	889.154	0.75152	0.184655	4.06987	4.70402e-05	0.0126898
Gene.194659::CIGENEomyV6.47112.1::g.194659::m.194659	18.173	1.08784	0.267179	4.07158	4.66959e-05	0.0126898
Gene.147324::CIGENEomyV6.34590.1::g.147324::m.147324	39.9493	-1.04968	0.258783	-4.05622	4.98738e-05	0.0132649
Gene.209969::CIGENEomyV6.50512.1::g.209969::m.209969	344.434	-0.96273	0.237464	-4.05421	5.03039e-05	0.0132649
Gene.2346::CIGENEomyV6.1402.12::g.2346::m.2346	3691.96	-0.751587	0.185389	-4.05411	5.03246e-05	0.0132649
Gene.194533::CIGENEomyV6.47111.1::g.194533::m.194533	9.10352	0.984038	0.243045	4.04878	5.14848e-05	0.0133667
Gene.40017::CIGENEomyV6.10609.1::g.40017::m.40017	94.1187	0.93191	0.23017	4.04878	5.14845e-05	0.0133667
Gene.120450::CIGENEomyV6.30020.1::g.120450::m.120450	37.8862	0.870352	0.215164	4.04507	5.23077e-05	0.0134261
Gene.160170::CIGENEomyV6.36771.1::g.160170::m.160170	303.083	-0.940727	0.232807	-4.0408	5.32688e-05	0.0134261
Gene.165411::CIGENEomyV6.42481.1::g.165411::m.165411	12.3039	-1.11759	0.276373	-4.04379	5.25947e-05	0.0134261
Gene.213148::CIGENEomyV6.51740.1::g.213148::m.213148	177.239	-0.879343	0.217566	-4.04173	5.30594e-05	0.0134261
Gene.218924::CIGENEomyV6.52460.1::g.218924::m.218924	84.4557	-0.917239	0.227464	-4.03246	5.5196e-05	0.013811
Gene.275816::CIGENEomyV6.66873.1::g.275816::m.275816	284.75	-0.961616	0.238699	-4.02858	5.61146e-05	0.0139398
Gene.44471::CIGENEomyV6.10047.1::g.44471::m.44471	204.142	0.712172	0.176856	4.02684	5.65308e-05	0.0139429
Gene.18556::CIGENEomyV6.4964.1::g.18556::m.18556	415.691	-0.504257	0.125524	-4.01723	5.88866e-05	0.0143194
Gene.282716::CIGENEomyV6.69311.1::g.282716::m.282716	40.6108	-1.0128	0.252064	-4.01805	5.8683e-05	0.0143194
Gene.292137::CIGENEomyV6.71298.1::g.292137::m.292137	83.6008	-1.11243	0.277519	-4.00847	6.11131e-05	0.0147569
Gene.29875::CIGENEomyV6.5284.1::g.29875::m.29875	164.643	-0.839251	0.209466	-4.00662	6.15944e-05	0.0147698
Gene.78634::CIGENEomyV6.21688.1::g.78634::m.78634	206.627	0.70821	0.177389	3.99241	6.54049e-05	0.0155754
Gene.327228::CIGENEomyV6.80863.1::g.327228::m.327228	61.0044	-0.960164	0.240977	-3.98446	6.76343e-05	0.015996
Gene.243444::CIGENEomyV6.60632.1::g.243444::m.243444	309.53	-0.946115	0.238298	-3.97031	7.1779e-05	0.0168607
Gene.368753::CIGENEomyV6.97641.1::g.368753::m.368753	77.4536	-1.0227	0.25781	-3.96687	7.2822e-05	0.0169902
Gene.111505::CIGENEomyV6.27986.1::g.111505::m.111505	212.716	0.68654	0.173205	3.96374	7.37847e-05	0.0170401
Gene.274694::CIGENEomyV6.67290.1::g.274694::m.274694	907.78	0.634812	0.160186	3.96297	7.40231e-05	0.0170401
Gene.67699::CIGENEomyV6.15591.1::g.67699::m.67699	33.6243	-1.0706	0.270585	-3.95661	7.60199e-05	0.0173839
Gene.152777::CIGENEomyV6.39174.1::g.152777::m.152777	46.2418	-1.02649	0.260139	-3.94593	7.94923e-05	0.0180481
Gene.257816::CIGENEomyV6.62500.1::g.257816::m.257816	40.9111	-1.09072	0.276627	-3.94293	8.04926e-05	0.0180481
Gene.302222::CIGENEomyV6.73682.1::g.302222::m.302222	172.159	-0.944396	0.239513	-3.94299	8.04725e-05	0.0180481
Gene.278419::CIGENEomyV6.67276.1::g.278419::m.278419	17.3262	1.07875	0.274526	3.9295	8.51233e-05	0.0189633
Gene.125249::CIGENEomyV6.32446.1::g.125249::m.125249	663.628	-0.826148	0.210363	-3.92725	8.5924e-05	0.0190189
Gene.107996::CIGENEomyV6.27445.1::g.107996::m.107996	160.651	-1.01074	0.257606	-3.92358	8.7242e-05	0.019184
Gene.165400::CIGENEomyV6.42324.1::g.165400::m.165400	58.7067	-1.06748	0.272315	-3.92003	8.8537e-05	0.019184
Gene.235066::CIGENEomyV6.55815.1::g.235066::m.235066	25.7793	-1.0412	0.265676	-3.91907	8.8892e-05	0.019184
Gene.341784::CIGENEomyV6.84727.1::g.341784::m.341784	104.054	-0.99844	0.254683	-3.92033	8.84285e-05	0.019184
Gene.375117::CIGENEomyV6.102452.1::g.375117::m.375117	10.1082	1.09312	0.279101	3.91656	8.98218e-05	0.0192643
Gene.213652::CIGENEomyV6.53093.2::g.213652::m.213652	72.0725	0.895342	0.228915	3.91124	9.18229e-05	0.0195719
Gene.33636::CIGENEomyV6.9580.1::g.33636::m.33636	224.145	-0.828064	0.211868	-3.90839	9.29148e-05	0.0196831
Gene.281752::CIGENEomyV6.70493.2::g.281752::m.281752	20.5659	-1.03351	0.265069	-3.89901	9.65878e-05	0.0203364
Gene.106246::CIGENEomyV6.25573.1::g.106246::m.106246	58.256	0.912706	0.234438	3.89317	9.89439e-05	0.0206755
Gene.123140::CIGENEomyV6.27305.1::g.123140::m.123140	96.4523	-0.919858	0.23641	-3.89095	9.98513e-05	0.0206755
Gene.180956::CIGENEomyV6.47103.2::g.180956::m.180956	179.601	-0.964072	0.247795	-3.89061	9.99945e-05	0.0206755
Gene.110893::CIGENEomyV6.30092.2::g.110893::m.110893	289	0.608104	0.156395	3.88827	0.000100963	0.0207515
Gene.128635::CIGENEomyV6.30383.1::g.128635::m.128635	391.732	0.690274	0.17789	3.88034	0.00010431	0.0213125
Gene.32386::CIGENEomyV6.9255.1::g.32386::m.32386	196.165	0.888336	0.229067	3.87806	0.000105293	0.0213868
Gene.305530::CIGENEomyV6.75633.1::g.305530::m.305530	1158.69	-0.755155	0.194903	-3.87452	0.000106835	0.0215732
Gene.327504::CIGENEomyV6.80946.1::g.327504::m.327504	57.4873	-0.997195	0.25759	-3.87124	0.000108282	0.0217382
Gene.310495::CIGENEomyV6.76279.1::g.310495::m.310495	200.57	-0.853925	0.220967	-3.86449	0.000111321	0.0222191
Gene.302168::CIGENEomyV6.73095.1::g.302168::m.302168	125.766	-1.07756	0.279013	-3.86203	0.000112447	0.022315
Gene.214574::CIGENEomyV6.53720.2::g.214574::m.214574	492.46	-1.00832	0.261189	-3.86051	0.000113151	0.0223263
Gene.159117::CIGENEomyV6.39035.1::g.159117::m.159117	118.031	-0.842282	0.218441	-3.85588	0.000115312	0.0223692
Gene.196033::CIGENEomyV6.45622.1::g.196033::m.196033	22.1888	-1.01526	0.263174	-3.85774	0.000114438	0.0223692
Gene.91624::CIGENEomyV6.20834.1::g.91624::m.91624	87.0417	-1.00251	0.259964	-3.85633	0.000115101	0.0223692
Gene.48047::CIGENEomyV6.12446.1::g.48047::m.48047	43.4264	-1.07299	0.278625	-3.851	0.000117637	0.0226928
Gene.152684::CIGENEomyV6.37188.1::g.152684::m.152684	174.51	-0.77692	0.202112	-3.844	0.000121044	0.0227165
Gene.242351::CIGENEomyV6.57456.1::g.242351::m.242351	19.2101	1.07132	0.27868	3.84425	0.000120924	0.0227165
Gene.282377::CIGENEomyV6.70069.1::g.282377::m.282377	311.03	-0.672473	0.174846	-3.84608	0.000120024	0.0227165
Gene.301388::CIGENEomyV6.74143.8::g.301388::m.301388	121.987	-0.791326	0.205644	-3.84804	0.000119068	0.0227165
Gene.312102::CIGENEomyV6.75000.2::g.312102::m.312102	1281.36	-0.756038	0.19668	-3.84399	0.000121049	0.0227165
Gene.15950::CIGENEomyV6.4487.2::g.15950::m.15950	1625.5	-0.550127	0.143214	-3.84129	0.000122391	0.0228419
Gene.228757::CIGENEomyV6.54878.1::g.228757::m.228757	344.993	0.761003	0.198179	3.83999	0.000123041	0.0228419
Gene.247951::CIGENEomyV6.58510.1::g.247951::m.247951	308.997	-0.683163	0.177981	-3.83841	0.000123833	0.0228661
Gene.1301::CIGENEomyV6.682.1::g.1301::m.1301	268.358	0.715186	0.186529	3.83417	0.000125989	0.0231404
Gene.18580::CIGENEomyV6.4509.1::g.18580::m.18580	72.9866	-0.98787	0.25802	-3.82866	0.000128843	0.0234155
Gene.281906::CIGENEomyV6.69328.1::g.281906::m.281906	30.2145	-1.02246	0.266985	-3.82966	0.000128321	0.0234155
Gene.210683::CIGENEomyV6.48532.1::g.210683::m.210683	196.475	0.703157	0.183808	3.8255	0.000130506	0.0234706
Gene.245963::CIGENEomyV6.59812.1::g.245963::m.245963	284.496	0.584143	0.152675	3.82604	0.00013022	0.0234706
Gene.202219::CIGENEomyV6.48503.2::g.202219::m.202219	436.136	-0.515278	0.134904	-3.81958	0.000133677	0.0236711
Gene.44096::CIGENEomyV6.8136.1::g.44096::m.44096	761.8	0.615784	0.161148	3.82122	0.000132791	0.0236711
Gene.85757::CIGENEomyV6.20883.2::g.85757::m.85757	129.85	-1.0442	0.273369	-3.81974	0.000133593	0.0236711
Gene.180679::CIGENEomyV6.42019.2::g.180679::m.180679	314.871	0.894716	0.23444	3.8164	0.000135415	0.0237355
Gene.28222::CIGENEomyV6.5849.2::g.28222::m.28222	521.962	-1.00404	0.263067	-3.81668	0.000135258	0.0237355
Gene.133301::CIGENEomyV6.31254.1::g.133301::m.133301	743.119	-0.406309	0.106529	-3.81407	0.000136697	0.0238391
Gene.213272::CIGENEomyV6.52191.1::g.213272::m.213272	47.1247	-1.06747	0.279973	-3.81277	0.00013742	0.0238448
Gene.358120::CIGENEomyV6.89034.1::g.358120::m.358120	8.31955	-1.01787	0.267364	-3.80704	0.000140643	0.0242819
Gene.70326::CIGENEomyV6.16578.1::g.70326::m.70326	661.865	-0.919569	0.241771	-3.80348	0.00014268	0.0245112
Gene.160342::CIGENEomyV6.37817.1::g.160342::m.160342	474.596	-0.999061	0.262786	-3.80181	0.000143642	0.0245542
Gene.222653::CIGENEomyV6.54792.1::g.222653::m.222653	922.752	-1.03831	0.273293	-3.79925	0.000145134	0.0246871
Gene.153667::CIGENEomyV6.39231.1::g.153667::m.153667	15.2289	-1.05984	0.279185	-3.79619	0.000146936	0.0247393
Gene.54440::CIGENEomyV6.13091.1::g.54440::m.54440	989.339	-0.837647	0.220719	-3.79509	0.00014759	0.0247393
Gene.84314::CIGENEomyV6.20578.1::g.84314::m.84314	35.6079	1.0215	0.269071	3.7964	0.000146815	0.0247393
Gene.113115::CIGENEomyV6.27240.1::g.113115::m.113115	25247.8	-0.599331	0.158187	-3.78874	0.000151413	0.0252574
Gene.343062::CIGENEomyV6.84861.1::g.343062::m.343062	124.865	-0.678135	0.179102	-3.78631	0.000152903	0.0253833
Gene.111463::CIGENEomyV6.27834.1::g.111463::m.111463	3684.95	0.884772	0.233963	3.78168	0.000155773	0.0257361
Gene.226911::CIGENEomyV6.56102.5::g.226911::m.226911	15.8414	1.03985	0.2754	3.77577	0.000159516	0.0262289
Gene.227108::CIGENEomyV6.55664.4::g.227108::m.227108	135.904	0.686745	0.182168	3.76985	0.000163348	0.0267318
Gene.291244::CIGENEomyV6.71082.1::g.291244::m.291244	1163.29	0.644621	0.171267	3.76384	0.000167325	0.0272535
Gene.59925::CIGENEomyV6.14282.1::g.59925::m.59925	950.045	-0.849674	0.226078	-3.75832	0.000171057	0.0277305
Gene.239196::CIGENEomyV6.58088.1::g.239196::m.239196	1346.19	-0.649808	0.17305	-3.75504	0.000173317	0.0279656
Gene.260646::CIGENEomyV6.62339.1::g.260646::m.260646	83.961	-0.911861	0.243077	-3.75133	0.000175896	0.0279736
Gene.27383::CIGENEomyV6.4847.2::g.27383::m.27383	182.108	0.86351	0.230168	3.75165	0.000175673	0.0279736
Gene.287968::CIGENEomyV6.70361.1::g.287968::m.287968	94.6269	-0.814264	0.216999	-3.75238	0.000175161	0.0279736
Gene.363268::CIGENEomyV6.93481.2::g.363268::m.363268	75.8558	-1.04992	0.279954	-3.75032	0.000176607	0.0279736
Gene.189596::CIGENEomyV6.46170.1::g.189596::m.189596	86.7281	-0.794283	0.212161	-3.74377	0.000181282	0.0281968
Gene.279555::CIGENEomyV6.67106.2::g.279555::m.279555	827.918	-0.634142	0.169374	-3.74404	0.000181083	0.0281968
Gene.43675::CIGENEomyV6.10082.2::g.43675::m.43675	429.673	0.452877	0.120894	3.74608	0.000179617	0.0281968
Gene.52116::CIGENEomyV6.14590.1::g.52116::m.52116	11019.7	0.85725	0.228882	3.74538	0.000180119	0.0281968
Gene.278539::CIGENEomyV6.67624.1::g.278539::m.278539	86.4402	-0.895332	0.239274	-3.74187	0.000182656	0.028283
Gene.218464::CIGENEomyV6.52511.1::g.218464::m.218464	321.585	-0.555551	0.148706	-3.73589	0.000187051	0.0288342
Gene.287691::CIGENEomyV6.68954.1::g.287691::m.287691	25.6619	-0.964894	0.258665	-3.73029	0.000191263	0.0292226
Gene.349731::CIGENEomyV6.86812.1::g.349731::m.349731	45.0145	-0.938645	0.251553	-3.7314	0.00019042	0.0292226
Gene.71805::CIGENEomyV6.17679.1::g.71805::m.71805	86.7625	-1.01333	0.271733	-3.72915	0.000192128	0.0292255
Gene.228860::CIGENEomyV6.55572.1::g.228860::m.228860	17854.5	0.9121	0.244814	3.72569	0.000194779	0.0294987
Gene.111804::CIGENEomyV6.27539.1::g.111804::m.111804	3479.82	0.577968	0.155342	3.72061	0.000198741	0.0298301
Gene.139960::CIGENEomyV6.34680.3::g.139960::m.139960	556.173	-0.767493	0.206339	-3.71957	0.000199558	0.0298301
Gene.72117::CIGENEomyV6.18553.1::g.72117::m.72117	110.392	1.01608	0.273151	3.71983	0.000199355	0.0298301
Gene.86002::CIGENEomyV6.22210.1::g.86002::m.86002	710.959	0.742346	0.199704	3.71722	0.000201425	0.0299794
Gene.239793::CIGENEomyV6.60305.2::g.239793::m.239793	403.293	0.613923	0.165378	3.71223	0.000205443	0.0303513
Gene.285678::CIGENEomyV6.70334.2::g.285678::m.285678	1389.5	-0.705032	0.189937	-3.71193	0.000205682	0.0303513
Gene.287394::CIGENEomyV6.68633.1::g.287394::m.287394	34.2645	0.962035	0.259425	3.70834	0.000208624	0.0305735
Gene.94451::CIGENEomyV6.23368.1::g.94451::m.94451	265.218	-0.800944	0.216008	-3.70793	0.000208959	0.0305735
Gene.159135::CIGENEomyV6.37935.1::g.159135::m.159135	330.934	0.855487	0.230854	3.70575	0.000210768	0.0307081
Gene.245076::CIGENEomyV6.59400.1::g.245076::m.245076	96.6029	-0.901919	0.243465	-3.70451	0.000211796	0.0307282
Gene.43543::CIGENEomyV6.7447.13::g.43543::m.43543	364.914	0.800377	0.216165	3.70262	0.000213381	0.0308287
Gene.135711::CIGENEomyV6.30382.1::g.135711::m.135711	26.4252	1.00726	0.272537	3.69586	0.000219145	0.0309898
Gene.176729::CIGENEomyV6.42438.1::g.176729::m.176729	107.478	0.85275	0.230727	3.69592	0.000219092	0.0309898
Gene.20210::CIGENEomyV6.3706.1::g.20210::m.20210	29.5614	0.838511	0.22686	3.69616	0.000218882	0.0309898
Gene.232550::CIGENEomyV6.55457.1::g.232550::m.232550	116.04	-0.924717	0.24997	-3.69932	0.000216178	0.0309898
Gene.233484::CIGENEomyV6.54946.1::g.233484::m.233484	66.1173	-0.88949	0.240728	-3.69501	0.000219882	0.0309898
Gene.277989::CIGENEomyV6.67861.1::g.277989::m.277989	377.942	0.780556	0.211143	3.69682	0.000218319	0.0309898
Gene.262789::CIGENEomyV6.63234.1::g.262789::m.262789	47.3427	-1.03051	0.278996	-3.69365	0.000221058	0.031029
Gene.169550::CIGENEomyV6.42436.3::g.169550::m.169550	51.6324	1.02144	0.276869	3.68926	0.000224909	0.0311892
Gene.248278::CIGENEomyV6.58521.1::g.248278::m.248278	17.1576	1.03175	0.279623	3.68977	0.000224453	0.0311892
Gene.41038::CIGENEomyV6.10861.3::g.41038::m.41038	12.2365	1.03141	0.279528	3.68982	0.000224411	0.0311892
Gene.114244::CIGENEomyV6.27112.3::g.114244::m.114244	338.816	-0.759996	0.206184	-3.68601	0.000227801	0.0314639
Gene.364946::CIGENEomyV6.94800.1::g.364946::m.364946	101.103	-0.910288	0.247482	-3.67821	0.00023488	0.0323124
Gene.194543::CIGENEomyV6.45478.1::g.194543::m.194543	138.271	-0.799817	0.21762	-3.67529	0.000237579	0.032554
Gene.215293::CIGENEomyV6.53219.1::g.215293::m.215293	43.2147	-1.02813	0.279825	-3.67419	0.000238607	0.0325656
Gene.323472::CIGENEomyV6.79117.1::g.323472::m.323472	412.39	0.391489	0.106619	3.67184	0.000240806	0.0327364
Gene.36548::CIGENEomyV6.7513.1::g.36548::m.36548	23.5887	-0.966563	0.263509	-3.66804	0.000244414	0.0330965
Gene.250286::CIGENEomyV6.60361.1::g.250286::m.250286	16.7017	-1.02428	0.279399	-3.66599	0.000246384	0.033233
Gene.134502::CIGENEomyV6.30534.1::g.134502::m.134502	313.219	-0.666189	0.181817	-3.66406	0.000248249	0.0333543
Gene.307339::CIGENEomyV6.75133.1::g.307339::m.307339	37.2073	-1.00733	0.275149	-3.66105	0.000251182	0.0336175
Gene.222465::CIGENEomyV6.54703.2::g.222465::m.222465	6.28149	-1.00808	0.275437	-3.65993	0.000252281	0.0336342
Gene.73759::CIGENEomyV6.18079.1::g.73759::m.73759	87.3891	-0.979396	0.267938	-3.65531	0.000256873	0.0341148
Gene.143154::CIGENEomyV6.33466.1::g.143154::m.143154	42.6303	-1.02217	0.279813	-3.65304	0.000259153	0.0341663
Gene.218100::CIGENEomyV6.51258.1::g.218100::m.218100	322.663	-0.693208	0.189766	-3.65295	0.00025924	0.0341663
Gene.181296::CIGENEomyV6.45124.1::g.181296::m.181296	442.498	-0.760189	0.208173	-3.65172	0.00026049	0.0342004
Gene.29123::CIGENEomyV6.5830.2::g.29123::m.29123	375.647	-0.784039	0.214924	-3.64799	0.000264303	0.0344392
Gene.36208::CIGENEomyV6.9986.4::g.36208::m.36208	1138.22	-0.811075	0.222283	-3.64884	0.000263428	0.0344392
Gene.24855::CIGENEomyV6.4033.1::g.24855::m.24855	40.3279	1.01791	0.279258	3.64504	0.000267348	0.034705
Gene.311558::CIGENEomyV6.75343.1::g.311558::m.311558	134.464	0.951237	0.261055	3.64381	0.000268628	0.0347405
Gene.128834::CIGENEomyV6.32725.1::g.128834::m.128834	150.935	-1.00703	0.276978	-3.63577	0.000277148	0.0355759
Gene.371087::CIGENEomyV6.99425.1::g.371087::m.371087	59.449	-0.917249	0.25224	-3.63641	0.000276464	0.0355759
Gene.123259::CIGENEomyV6.28837.1::g.123259::m.123259	144.168	-0.649779	0.179089	-3.62824	0.000285355	0.0363656
Gene.338066::CIGENEomyV6.82276.4::g.338066::m.338066	6709.29	-0.51856	0.142925	-3.6282	0.000285406	0.0363656
Gene.226692::CIGENEomyV6.55781.1::g.226692::m.226692	80.4763	-0.823807	0.227416	-3.62248	0.000291796	0.0370431
Gene.286673::CIGENEomyV6.69976.2::g.286673::m.286673	522.616	-0.712054	0.196629	-3.6213	0.000293122	0.0370751
Gene.147300::CIGENEomyV6.35717.1::g.147300::m.147300	29.8339	0.889147	0.245861	3.61646	0.000298658	0.0373647
Gene.247329::CIGENEomyV6.59629.1::g.247329::m.247329	286.334	0.523777	0.144811	3.61696	0.00029808	0.0373647
Gene.362085::CIGENEomyV6.92467.1::g.362085::m.362085	24.089	1.01095	0.279524	3.61668	0.00029841	0.0373647
Gene.193422::CIGENEomyV6.44775.1::g.193422::m.193422	34.4017	-1.0068	0.278595	-3.61383	0.000301706	0.0376098
Gene.322602::CIGENEomyV6.80050.1::g.322602::m.322602	373.832	-0.764767	0.211685	-3.61277	0.000302947	0.0376287
Gene.106653::CIGENEomyV6.24492.1::g.106653::m.106653	1806	-0.674229	0.186706	-3.61117	0.000304818	0.0377253
Gene.214173::CIGENEomyV6.53202.1::g.214173::m.214173	49.1531	-0.917449	0.254461	-3.60545	0.000311607	0.0380205
Gene.308735::CIGENEomyV6.75014.1::g.308735::m.308735	21.7902	-0.975741	0.270602	-3.60582	0.000311166	0.0380205
Gene.313182::CIGENEomyV6.78359.1::g.313182::m.313182	138.463	0.876838	0.243057	3.60754	0.00030912	0.0380205
Gene.83749::CIGENEomyV6.21646.1::g.83749::m.83749	74.2456	-0.816842	0.226554	-3.6055	0.000311554	0.0380205
Gene.139138::CIGENEomyV6.34648.1::g.139138::m.139138	239.2	0.608119	0.168817	3.60224	0.000315489	0.0382683
Gene.66114::CIGENEomyV6.17849.1::g.66114::m.66114	6766.8	0.51758	0.143695	3.60194	0.000315855	0.0382683
Gene.115326::CIGENEomyV6.28349.1::g.115326::m.115326	241.494	-0.747078	0.207891	-3.59361	0.000326133	0.039102
Gene.160543::CIGENEomyV6.38887.1::g.160543::m.160543	1883.3	-0.857822	0.238679	-3.59405	0.000325583	0.039102
Gene.30370::CIGENEomyV6.8285.1::g.30370::m.30370	85.257	-0.760772	0.211669	-3.59415	0.00032545	0.039102
Gene.277468::CIGENEomyV6.67504.1::g.277468::m.277468	306.869	-0.495783	0.138132	-3.58919	0.000331709	0.039633
Gene.330736::CIGENEomyV6.81659.1::g.330736::m.330736	33.2634	-0.986081	0.275052	-3.58507	0.000336989	0.040125
Gene.4209::CIGENEomyV6.3348.1::g.4209::m.4209	149.956	0.878972	0.245289	3.58342	0.000339128	0.0402409
Gene.154556::CIGENEomyV6.38099.1::g.154556::m.154556	3966.32	0.763378	0.213297	3.57894	0.000344989	0.0406614
Gene.81784::CIGENEomyV6.21141.1::g.81784::m.81784	448.149	0.458207	0.12803	3.57891	0.000345027	0.0406614
Gene.370757::CIGENEomyV6.99139.1::g.370757::m.370757	71.4923	-0.975355	0.272723	-3.57636	0.000348412	0.0408964
Gene.82556::CIGENEomyV6.22624.6::g.82556::m.82556	13.8656	1.00067	0.279858	3.57563	0.00034939	0.0408964
Gene.14073::CIGENEomyV6.1265.1::g.14073::m.14073	34.184	-0.943716	0.264033	-3.57423	0.000351264	0.0409768
Gene.281480::CIGENEomyV6.68386.1::g.281480::m.281480	110.998	0.826949	0.231736	3.5685	0.000359032	0.041742
Gene.91036::CIGENEomyV6.20419.2::g.91036::m.91036	956.559	-0.586756	0.164478	-3.56739	0.000360555	0.0417784
Gene.174215::CIGENEomyV6.41034.1::g.174215::m.174215	463.741	-0.552348	0.154922	-3.56532	0.000363408	0.0419681
Gene.134280::CIGENEomyV6.32182.1::g.134280::m.134280	15.9151	-0.952181	0.267275	-3.56256	0.000367261	0.0422718
Gene.224672::CIGENEomyV6.56614.1::g.224672::m.224672	280.567	-0.927686	0.260487	-3.56135	0.000368958	0.0423259
Gene.241911::CIGENEomyV6.57445.3::g.241911::m.241911	51.6611	-0.760895	0.213842	-3.55821	0.000373391	0.0426927
Gene.238245::CIGENEomyV6.60189.2::g.238245::m.238245	3423.14	-0.919071	0.258828	-3.55089	0.000383925	0.0437522
Gene.111497::CIGENEomyV6.29653.5::g.111497::m.111497	168.006	-0.664044	0.187291	-3.54552	0.000391844	0.0444124
Gene.168226::CIGENEomyV6.41785.4::g.168226::m.168226	595.931	-0.695423	0.196158	-3.54522	0.00039229	0.0444124
Gene.270132::CIGENEomyV6.66127.2::g.270132::m.270132	794.32	0.564589	0.159309	3.544	0.000394111	0.0444727
Gene.289067::CIGENEomyV6.69100.1::g.289067::m.289067	109.977	0.752785	0.212522	3.54215	0.000396884	0.0446398
Gene.106251::CIGENEomyV6.25222.1::g.106251::m.106251	466.905	-0.687105	0.194069	-3.54053	0.000399328	0.0446972
Gene.237352::CIGENEomyV6.57599.1::g.237352::m.237352	18.9656	0.962399	0.271988	3.53839	0.000402573	0.0446972
Gene.368317::CIGENEomyV6.97326.1::g.368317::m.368317	65.5913	-0.918628	0.25954	-3.53944	0.000400975	0.0446972
Gene.85576::CIGENEomyV6.21866.2::g.85576::m.85576	556.836	0.734453	0.207553	3.53863	0.000402206	0.0446972
Gene.220729::CIGENEomyV6.52736.1::g.220729::m.220729	20.3583	-0.832059	0.235606	-3.53156	0.000413114	0.0452852
Gene.302327::CIGENEomyV6.73433.1::g.302327::m.302327	56.4247	-0.988969	0.279905	-3.53323	0.000410521	0.0452852
Gene.70157::CIGENEomyV6.15731.1::g.70157::m.70157	530.979	-0.707493	0.200235	-3.53331	0.00041039	0.0452852
Gene.8746::CIGENEomyV6.2266.1::g.8746::m.8746	69.7783	-0.686827	0.194455	-3.53207	0.000412322	0.0452852
Gene.240154::CIGENEomyV6.60295.1::g.240154::m.240154	252.841	-0.728641	0.206437	-3.52961	0.00041618	0.0453335
Gene.30400::CIGENEomyV6.10163.1::g.30400::m.30400	32.5566	0.909854	0.257751	3.52997	0.000415612	0.0453335
Gene.160537::CIGENEomyV6.38039.1::g.160537::m.160537	17.4	0.98645	0.27989	3.52442	0.000424415	0.046085
Gene.137596::CIGENEomyV6.32655.1::g.137596::m.137596	132.655	0.757916	0.215279	3.52062	0.000430537	0.0464628
Gene.92709::CIGENEomyV6.22152.1::g.92709::m.92709	69.6832	-0.973354	0.276475	-3.52059	0.000430585	0.0464628
Gene.14814::CIGENEomyV6.3952.1::g.14814::m.14814	46.7351	-0.968012	0.275431	-3.51453	0.000440527	0.0472706
Gene.361164::CIGENEomyV6.91748.1::g.361164::m.361164	24.4714	-0.967372	0.275262	-3.51436	0.000440809	0.0472706
Gene.237045::CIGENEomyV6.58290.1::g.237045::m.237045	20.7065	0.980346	0.279323	3.50971	0.000448587	0.0476607
Gene.287671::CIGENEomyV6.70511.1::g.287671::m.287671	110.486	-0.961318	0.273828	-3.51067	0.000446987	0.0476607
Gene.303625::CIGENEomyV6.72794.1::g.303625::m.303625	36.4378	-0.963365	0.274447	-3.51021	0.000447756	0.0476607
Gene.258510::CIGENEomyV6.61023.6::g.258510::m.258510	6466.46	-0.864024	0.246327	-3.50763	0.000452121	0.0478888
Gene.369137::CIGENEomyV6.97901.2::g.369137::m.369137	79.7046	-0.981546	0.279946	-3.5062	0.000454554	0.0479993
Gene.126425::CIGENEomyV6.31914.1::g.126425::m.126425	1430.83	0.449663	0.128407	3.50185	0.000462036	0.0484098
Gene.195031::CIGENEomyV6.45084.1::g.195031::m.195031	62.3117	-0.966929	0.276211	-3.50069	0.00046405	0.0484098
Gene.315373::CIGENEomyV6.77726.1::g.315373::m.315373	28.2315	-0.866988	0.24757	-3.50199	0.000461803	0.0484098
Gene.339004::CIGENEomyV6.83183.3::g.339004::m.339004	181.96	-0.671978	0.191928	-3.5012	0.000463164	0.0484098
Gene.137962::CIGENEomyV6.35546.3::g.137962::m.137962	165.89	-0.781392	0.223585	-3.49483	0.000474368	0.049189
Gene.285536::CIGENEomyV6.70231.1::g.285536::m.285536	140.107	-0.94312	0.269826	-3.49529	0.000473554	0.049189
Gene.151053::CIGENEomyV6.37942.1::g.151053::m.151053	68.1345	-0.640688	0.183375	-3.49388	0.000476057	0.0492164
Gene.165799::CIGENEomyV6.41164.1::g.165799::m.165799	498.902	-0.535035	0.153514	-3.48525	0.000491675	0.0506792
Gene.25118::CIGENEomyV6.3562.3::g.25118::m.25118	71.6799	0.946838	0.271817	3.48337	0.000495145	0.0506921
Gene.320623::CIGENEomyV6.79423.1::g.320623::m.320623	279.684	0.674897	0.193824	3.48201	0.000497672	0.0506921
Gene.322993::CIGENEomyV6.79028.1::g.322993::m.322993	101.095	0.958184	0.275058	3.48357	0.000494771	0.0506921
Gene.57575::CIGENEomyV6.13851.3::g.57575::m.57575	38.6792	-0.974673	0.279887	-3.48238	0.000496982	0.0506921
Gene.303104::CIGENEomyV6.74095.1::g.303104::m.303104	7.57442	0.972333	0.279475	3.47914	0.000503024	0.0510866
Gene.4426::CIGENEomyV6.2718.11::g.4426::m.4426	2745.82	-0.811591	0.233337	-3.4782	0.000504796	0.0511162
Gene.324380::CIGENEomyV6.77288.1::g.324380::m.324380	344.611	-0.92648	0.266473	-3.47682	0.000507399	0.0512295
Gene.233225::CIGENEomyV6.54529.1::g.233225::m.233225	256.998	0.61072	0.175746	3.47501	0.000510826	0.0513839
Gene.320118::CIGENEomyV6.78143.3::g.320118::m.320118	490.586	0.443132	0.12754	3.47445	0.000511905	0.0513839
Gene.322152::CIGENEomyV6.79113.1::g.322152::m.322152	13.6263	-0.969717	0.27931	-3.47183	0.000516921	0.0516859
Gene.327169::CIGENEomyV6.80286.1::g.327169::m.327169	168.742	0.825751	0.237878	3.47132	0.000517907	0.0516859
Gene.118181::CIGENEomyV6.29208.5::g.118181::m.118181	200.44	-0.824278	0.237576	-3.46954	0.000521356	0.0518261
Gene.224958::CIGENEomyV6.56774.1::g.224958::m.224958	1397.18	0.696173	0.200724	3.4683	0.000523756	0.0518261
Gene.369684::CIGENEomyV6.98388.1::g.369684::m.369684	22.4826	-0.970337	0.279775	-3.46827	0.000523814	0.0518261
Gene.52586::CIGENEomyV6.14726.1::g.52586::m.52586	55.3298	0.813784	0.23478	3.46616	0.000527947	0.0520857
Gene.111434::CIGENEomyV6.28729.1::g.111434::m.111434	3653.15	0.527846	0.152446	3.46252	0.00053515	0.0524412
Gene.116706::CIGENEomyV6.29842.1::g.116706::m.116706	72.9995	0.900508	0.260167	3.46127	0.000537625	0.0524412
Gene.264589::CIGENEomyV6.64156.2::g.264589::m.264589	15.6445	0.96349	0.278274	3.46238	0.000535421	0.0524412
Gene.28462::CIGENEomyV6.4607.2::g.28462::m.28462	1009.55	-0.503719	0.1455	-3.46198	0.000536222	0.0524412
Gene.202823::CIGENEomyV6.47688.1::g.202823::m.202823	171.38	0.962984	0.278348	3.45964	0.000540897	0.0526118
Gene.162746::CIGENEomyV6.38526.1::g.162746::m.162746	73.965	0.887503	0.256715	3.45715	0.000545916	0.0529508
Gene.374050::CIGENEomyV6.101623.1::g.374050::m.374050	78.1672	-0.709069	0.205274	-3.45426	0.000551808	0.0533723
Gene.320525::CIGENEomyV6.78059.1::g.320525::m.320525	54.8856	-0.949189	0.275012	-3.45144	0.000557607	0.0537826
Gene.276831::CIGENEomyV6.67588.1::g.276831::m.276831	53.6674	0.914815	0.265183	3.44975	0.000561116	0.0538918
Gene.46894::CIGENEomyV6.8556.1::g.46894::m.46894	76.5362	-0.882122	0.255733	-3.44939	0.000561861	0.0538918
Gene.158644::CIGENEomyV6.37753.1::g.158644::m.158644	4.17117	0.906774	0.26311	3.44637	0.000568181	0.0543471
Gene.350882::CIGENEomyV6.87184.1::g.350882::m.350882	453.866	0.672293	0.195126	3.44543	0.000570148	0.0543845
Gene.312329::CIGENEomyV6.75513.1::g.312329::m.312329	455.926	-0.462858	0.134421	-3.44335	0.000574557	0.054504
Gene.90325::CIGENEomyV6.20402.1::g.90325::m.90325	22.5172	0.954426	0.277171	3.44345	0.000574332	0.054504
Gene.271306::CIGENEomyV6.65425.1::g.271306::m.271306	213.378	-0.740783	0.21545	-3.4383	0.000585379	0.0553784
Gene.147776::CIGENEomyV6.36066.1::g.147776::m.147776	615.166	-0.685807	0.19954	-3.43694	0.00058833	0.0555055
Gene.149558::CIGENEomyV6.35814.1::g.149558::m.149558	73.418	-0.737336	0.214705	-3.43418	0.000594343	0.0557961
Gene.98899::CIGENEomyV6.24034.2::g.98899::m.98899	32.5289	0.916502	0.266887	3.43405	0.000594641	0.0557961
Gene.677::CIGENEomyV6.1461.3::g.677::m.677	307.451	0.815385	0.23755	3.43248	0.000598086	0.0559672
Gene.15471::CIGENEomyV6.5822.1::g.15471::m.15471	1325.12	-0.672087	0.195857	-3.43153	0.000600191	0.0560124
Gene.232993::CIGENEomyV6.55171.1::g.232993::m.232993	40.7623	-0.936047	0.272897	-3.43004	0.000603494	0.0560179
Gene.253437::CIGENEomyV6.61526.1::g.253437::m.253437	60.1364	0.796041	0.232075	3.43011	0.000603342	0.0560179
Gene.108036::CIGENEomyV6.28902.1::g.108036::m.108036	98.4156	0.754896	0.220219	3.42794	0.000608186	0.0563021
Gene.302105::CIGENEomyV6.73105.1::g.302105::m.302105	133.074	-0.936726	0.27357	-3.42408	0.000616885	0.0569547
Gene.180979::CIGENEomyV6.43739.1::g.180979::m.180979	53.6332	-0.822908	0.240456	-3.42228	0.000620994	0.0571812
Gene.87899::CIGENEomyV6.21503.2::g.87899::m.87899	30.1137	-0.948189	0.277295	-3.41943	0.00062753	0.0576293
Gene.270724::CIGENEomyV6.65857.1::g.270724::m.270724	16.5212	0.954949	0.279718	3.41398	0.00064022	0.0586387
Gene.41401::CIGENEomyV6.9154.1::g.41401::m.41401	266.993	-0.906649	0.26572	-3.41205	0.000644754	0.0588978
Gene.211774::CIGENEomyV6.52632.1::g.211774::m.211774	272.304	-0.469128	0.137553	-3.41053	0.000648366	0.0590715
Gene.356284::CIGENEomyV6.86907.1::g.356284::m.356284	529.688	0.571079	0.167545	3.40851	0.000653178	0.0593533
Gene.152641::CIGENEomyV6.37945.1::g.152641::m.152641	109.803	0.819004	0.240653	3.40326	0.000665868	0.0603476
Gene.121324::CIGENEomyV6.28545.1::g.121324::m.121324	339.739	0.667792	0.196624	3.3963	0.000683043	0.0606734
Gene.14709::CIGENEomyV6.4459.1::g.14709::m.14709	106.82	-0.941832	0.277499	-3.394	0.000688792	0.0606734
Gene.149326::CIGENEomyV6.34769.4::g.149326::m.149326	747.385	0.61491	0.181126	3.39492	0.000686483	0.0606734
Gene.180249::CIGENEomyV6.40440.2::g.180249::m.180249	723.749	-0.573308	0.168812	-3.39613	0.000683461	0.0606734
Gene.210261::CIGENEomyV6.50084.1::g.210261::m.210261	71.5325	0.917991	0.270352	3.39554	0.000684928	0.0606734
Gene.239761::CIGENEomyV6.58377.1::g.239761::m.239761	218.079	-0.715573	0.210407	-3.40089	0.00067166	0.0606734
Gene.277521::CIGENEomyV6.68278.1::g.277521::m.277521	57.0121	0.806228	0.237508	3.39453	0.000687462	0.0606734
Gene.351553::CIGENEomyV6.87212.1::g.351553::m.351553	95.6647	0.827907	0.243809	3.39572	0.000684489	0.0606734
Gene.351673::CIGENEomyV6.86415.1::g.351673::m.351673	51.0051	0.950177	0.279869	3.39507	0.000686099	0.0606734
Gene.78638::CIGENEomyV6.21450.1::g.78638::m.78638	147.794	-0.922684	0.271733	-3.39555	0.000684909	0.0606734
Gene.98642::CIGENEomyV6.24717.1::g.98642::m.98642	599.318	0.63762	0.18766	3.39773	0.000679469	0.0606734
Gene.223267::CIGENEomyV6.55798.1::g.223267::m.223267	562.126	-0.607454	0.179125	-3.39122	0.00069581	0.0611357
Gene.294189::CIGENEomyV6.72570.1::g.294189::m.294189	3876.81	-0.455646	0.134463	-3.38865	0.000702388	0.061557
Gene.60541::CIGENEomyV6.14979.1::g.60541::m.60541	19.8783	-0.906199	0.267542	-3.38713	0.000706288	0.0617421
Gene.126966::CIGENEomyV6.32036.1::g.126966::m.126966	4.21525	-0.659471	0.194961	-3.38257	0.000718106	0.062459
Gene.222949::CIGENEomyV6.56940.1::g.222949::m.222949	87.1466	0.867509	0.256417	3.3832	0.000716467	0.062459
Gene.153038::CIGENEomyV6.38599.9::g.153038::m.153038	7670.38	-0.453988	0.134366	-3.37874	0.000728197	0.062633
Gene.180432::CIGENEomyV6.42916.1::g.180432::m.180432	2480.46	0.578986	0.17129	3.38014	0.000724476	0.062633
Gene.181320::CIGENEomyV6.44215.10::g.181320::m.181320	161.702	-0.727505	0.215298	-3.37906	0.000727332	0.062633
Gene.221581::CIGENEomyV6.54559.1::g.221581::m.221581	611.759	-0.770213	0.227964	-3.37866	0.000728388	0.062633
Gene.228758::CIGENEomyV6.55535.1::g.228758::m.228758	19.2585	0.945671	0.27992	3.37837	0.000729176	0.062633
Gene.249609::CIGENEomyV6.59823.1::g.249609::m.249609	633.652	-0.898999	0.266239	-3.37666	0.000733704	0.0628055
Gene.312189::CIGENEomyV6.75044.2::g.312189::m.312189	37.1264	-0.866742	0.256718	-3.37625	0.000734823	0.0628055
Gene.375790::CIGENEomyV6.103068.1::g.375790::m.375790	12.3735	0.943006	0.27945	3.3745	0.000739488	0.0630482
Gene.132279::CIGENEomyV6.33046.1::g.132279::m.132279	474.753	-0.571953	0.16961	-3.37216	0.000745822	0.0632002
Gene.166331::CIGENEomyV6.41503.1::g.166331::m.166331	1975.63	-0.524805	0.155707	-3.37046	0.000750422	0.0632002
Gene.267277::CIGENEomyV6.65999.3::g.267277::m.267277	917.911	-0.535548	0.158868	-3.37103	0.000748882	0.0632002
Gene.67561::CIGENEomyV6.17251.1::g.67561::m.67561	294.148	-0.569975	0.169108	-3.37047	0.000750394	0.0632002
Gene.88881::CIGENEomyV6.21420.4::g.88881::m.88881	119.49	0.652672	0.193579	3.3716	0.000747317	0.0632002
Gene.279927::CIGENEomyV6.68232.1::g.279927::m.279927	8.6738	-0.941383	0.279593	-3.36697	0.000759978	0.0638493
Gene.13784::CIGENEomyV6.1962.1::g.13784::m.13784	50.7991	-0.691818	0.205709	-3.36309	0.000770745	0.0644403
Gene.8575::CIGENEomyV6.3319.1::g.8575::m.8575	16.5722	0.901845	0.268147	3.36325	0.000770316	0.0644403
Gene.324382::CIGENEomyV6.77554.1::g.324382::m.324382	26.0266	0.940443	0.279756	3.36166	0.000774764	0.0644641
Gene.41786::CIGENEomyV6.10240.1::g.41786::m.41786	161.432	0.688109	0.204692	3.36169	0.000774676	0.0644641
Gene.23463::CIGENEomyV6.6448.1::g.23463::m.23463	2358.63	0.616129	0.183453	3.35851	0.000783639	0.0648898
Gene.331479::CIGENEomyV6.80438.1::g.331479::m.331479	683.748	0.611472	0.182064	3.35855	0.000783517	0.0648898
Gene.146534::CIGENEomyV6.33643.1::g.146534::m.146534	435.26	0.832525	0.248183	3.35449	0.000795126	0.0656835
Gene.196452::CIGENEomyV6.46117.1::g.196452::m.196452	67.6101	-0.815245	0.243142	-3.35296	0.000799511	0.0657313
Gene.321340::CIGENEomyV6.77017.1::g.321340::m.321340	15.616	-0.923786	0.275504	-3.35307	0.000799199	0.0657313
Gene.80104::CIGENEomyV6.20559.1::g.80104::m.80104	204.334	-0.700633	0.209124	-3.35032	0.00080719	0.066205
Gene.322904::CIGENEomyV6.79733.2::g.322904::m.322904	71.2837	0.75454	0.225451	3.3468	0.000817508	0.0668923
Gene.61792::CIGENEomyV6.16444.2::g.61792::m.61792	17.7022	-0.909257	0.271776	-3.34561	0.000821018	0.0670207
Gene.203149::CIGENEomyV6.50034.1::g.203149::m.203149	1594.13	-0.589727	0.176386	-3.3434	0.000827599	0.0672671
Gene.271086::CIGENEomyV6.64995.1::g.271086::m.271086	24.5747	0.933013	0.279125	3.34263	0.000829881	0.0672671
Gene.92849::CIGENEomyV6.20077.2::g.92849::m.92849	70.8444	-0.905287	0.27079	-3.34313	0.000828391	0.0672671
Gene.113401::CIGENEomyV6.28846.1::g.113401::m.113401	15.5156	-0.917889	0.27476	-3.3407	0.000835683	0.0675788
Gene.337760::CIGENEomyV6.81889.1::g.337760::m.337760	33.2898	0.912016	0.273122	3.33922	0.000840139	0.0677804
Gene.345664::CIGENEomyV6.84447.1::g.345664::m.345664	193.127	0.810701	0.242924	3.33726	0.00084609	0.0681014
Gene.121787::CIGENEomyV6.27960.1::g.121787::m.121787	405.503	0.347436	0.104191	3.33462	0.000854175	0.0684331
Gene.25848::CIGENEomyV6.5978.2::g.25848::m.25848	973.026	0.710941	0.213184	3.33487	0.000853407	0.0684331
Gene.273692::CIGENEomyV6.64918.1::g.273692::m.273692	2946.97	-0.41946	0.125975	-3.32971	0.000869357	0.0694882
Gene.84168::CIGENEomyV6.21161.1::g.84168::m.84168	3785.95	-0.539981	0.162396	-3.32509	0.000883902	0.0704876
Gene.255998::CIGENEomyV6.62796.1::g.255998::m.255998	10.4825	0.929709	0.279727	3.32363	0.000888545	0.0706946
Gene.13836::CIGENEomyV6.618.1::g.13836::m.13836	6456.82	-0.503711	0.151599	-3.32265	0.000891676	0.0707634
Gene.310760::CIGENEomyV6.74914.1::g.310760::m.310760	83.1331	-0.773295	0.232819	-3.32144	0.000895557	0.0707634
Gene.46747::CIGENEomyV6.10279.1::g.46747::m.46747	32.4251	0.926545	0.278929	3.3218	0.000894397	0.0707634
Gene.133145::CIGENEomyV6.31707.1::g.133145::m.133145	271.967	-0.467134	0.140946	-3.31428	0.000918805	0.0724345
Gene.270675::CIGENEomyV6.65083.1::g.270675::m.270675	817.565	-0.695538	0.209932	-3.31316	0.000922495	0.0725598
Gene.353483::CIGENEomyV6.86421.1::g.353483::m.353483	77.0586	-0.796089	0.240351	-3.31219	0.000925688	0.0726455
Gene.334468::CIGENEomyV6.82479.1::g.334468::m.334468	308.155	-0.607388	0.183533	-3.30942	0.000934911	0.0732029
Gene.325925::CIGENEomyV6.80970.1::g.325925::m.325925	1312.02	-0.658108	0.198975	-3.30748	0.000941389	0.0735433
Gene.225464::CIGENEomyV6.57218.1::g.225464::m.225464	65.4815	-0.86954	0.263007	-3.30614	0.000945907	0.0735779
Gene.285742::CIGENEomyV6.70711.1::g.285742::m.285742	432.53	0.797506	0.241224	3.30609	0.000946093	0.0735779
Gene.268369::CIGENEomyV6.65768.1::g.268369::m.268369	166.302	-0.651911	0.197227	-3.30538	0.000948484	0.0735981
Gene.340799::CIGENEomyV6.83926.2::g.340799::m.340799	19775.6	0.647436	0.195948	3.30412	0.000952739	0.0737625
Gene.64415::CIGENEomyV6.16948.1::g.64415::m.64415	284.675	-0.688856	0.20859	-3.30244	0.000958474	0.0739218
Gene.97896::CIGENEomyV6.24404.1::g.97896::m.97896	323.092	-0.762942	0.231036	-3.30226	0.000959078	0.0739218
Gene.106787::CIGENEomyV6.23807.1::g.106787::m.106787	596.339	-0.748617	0.227084	-3.29666	0.000978421	0.0745811
Gene.194929::CIGENEomyV6.45744.2::g.194929::m.194929	447.775	0.620251	0.188145	3.29666	0.000978419	0.0745811
Gene.296856::CIGENEomyV6.71412.1::g.296856::m.296856	851.098	-0.396035	0.120132	-3.29666	0.000978431	0.0745811
Gene.350177::CIGENEomyV6.85714.1::g.350177::m.350177	23.5867	-0.875952	0.265559	-3.29853	0.000971932	0.0745811
Gene.9003::CIGENEomyV6.272.3::g.9003::m.9003	137.837	0.555662	0.168502	3.29766	0.000974955	0.0745811
Gene.110184::CIGENEomyV6.29448.16::g.110184::m.110184	2166.64	-0.571702	0.173595	-3.29331	0.000990137	0.0746494
Gene.165116::CIGENEomyV6.40390.5::g.165116::m.165116	296.575	0.59185	0.179627	3.29489	0.000984609	0.0746494
Gene.195388::CIGENEomyV6.47089.1::g.195388::m.195388	48.157	0.891336	0.270639	3.29344	0.000989685	0.0746494
Gene.204279::CIGENEomyV6.48973.1::g.204279::m.204279	16.027	-0.906233	0.27506	-3.29468	0.000985337	0.0746494
Gene.4358::CIGENEomyV6.99.2::g.4358::m.4358	251.375	0.919182	0.27905	3.29396	0.000987857	0.0746494
Gene.304974::CIGENEomyV6.73933.2::g.304974::m.304974	64.638	-0.913501	0.277624	-3.29043	0.00100034	0.0752545
Gene.240037::CIGENEomyV6.58182.2::g.240037::m.240037	166.566	-0.674239	0.205014	-3.28875	0.00100633	0.0755403
Gene.115187::CIGENEomyV6.26547.2::g.115187::m.115187	63.4363	0.786299	0.239467	3.28354	0.00102513	0.0759993
Gene.15458::CIGENEomyV6.4471.2::g.15458::m.15458	20.1525	0.905161	0.275679	3.28339	0.00102565	0.0759993
Gene.298404::CIGENEomyV6.71225.1::g.298404::m.298404	8.35048	0.913748	0.278144	3.28516	0.00101925	0.0759993
Gene.343138::CIGENEomyV6.85296.1::g.343138::m.343138	587.609	0.692205	0.210807	3.2836	0.0010249	0.0759993
Gene.353926::CIGENEomyV6.87350.1::g.353926::m.353926	4.61397	-0.663753	0.202011	-3.28573	0.00101717	0.0759993
Gene.75054::CIGENEomyV6.17305.1::g.75054::m.75054	558.306	0.473402	0.144127	3.28463	0.00102117	0.0759993
Gene.186768::CIGENEomyV6.46183.1::g.186768::m.186768	175.336	0.763327	0.232567	3.28218	0.0010301	0.0760025
Gene.226652::CIGENEomyV6.54963.1::g.226652::m.226652	400.381	-0.672437	0.204869	-3.28229	0.00102969	0.0760025
Gene.153794::CIGENEomyV6.39299.1::g.153794::m.153794	141.941	-0.748788	0.228261	-3.28041	0.00103658	0.0761555
Gene.243723::CIGENEomyV6.58228.1::g.243723::m.243723	75.4754	0.597233	0.182032	3.28093	0.00103466	0.0761555
Gene.10092::CIGENEomyV6.980.1::g.10092::m.10092	174.184	0.893228	0.272531	3.27754	0.00104717	0.0762847
Gene.165991::CIGENEomyV6.40363.5::g.165991::m.165991	507.884	-0.687297	0.209656	-3.27822	0.00104466	0.0762847
Gene.183993::CIGENEomyV6.47265.1::g.183993::m.183993	66.1395	0.871627	0.265892	3.27813	0.00104499	0.0762847
Gene.291176::CIGENEomyV6.71493.1::g.291176::m.291176	1927.74	-0.845199	0.257865	-3.27769	0.00104662	0.0762847
Gene.150750::CIGENEomyV6.36616.1::g.150750::m.150750	1212.95	0.712304	0.217461	3.27555	0.00105456	0.0763855
Gene.32792::CIGENEomyV6.10085.1::g.32792::m.32792	13.864	0.913469	0.27902	3.27384	0.00106095	0.0763855
Gene.351670::CIGENEomyV6.85825.1::g.351670::m.351670	522.82	0.481576	0.147135	3.27302	0.00106404	0.0763855
Gene.361031::CIGENEomyV6.91663.1::g.361031::m.361031	15.1189	0.915124	0.279511	3.27402	0.00106029	0.0763855
Gene.57282::CIGENEomyV6.12942.2::g.57282::m.57282	190.639	0.739101	0.22578	3.27355	0.00106207	0.0763855
Gene.70535::CIGENEomyV6.17550.3::g.70535::m.70535	8.30954	-0.820968	0.250774	-3.27374	0.00106135	0.0763855
Gene.9785::CIGENEomyV6.705.2::g.9785::m.9785	111.837	0.736693	0.224852	3.27635	0.00105158	0.0763855
Gene.356818::CIGENEomyV6.88099.1::g.356818::m.356818	13.899	0.914403	0.279464	3.27199	0.00106793	0.0765051
Gene.343761::CIGENEomyV6.84617.1::g.343761::m.343761	125.918	-0.600977	0.183709	-3.27135	0.00107037	0.0765213
Gene.291530::CIGENEomyV6.72646.1::g.291530::m.291530	21.9361	-0.889527	0.271968	-3.2707	0.00107281	0.0765371
Gene.35470::CIGENEomyV6.9230.2::g.35470::m.35470	436.974	0.689871	0.211004	3.26947	0.00107749	0.0767128
Gene.60183::CIGENEomyV6.12941.1::g.60183::m.60183	259.733	0.696982	0.213254	3.26832	0.00108188	0.0768671
Gene.251571::CIGENEomyV6.61545.2::g.251571::m.251571	707.553	0.523916	0.160431	3.26569	0.001092	0.0772677
Gene.26675::CIGENEomyV6.5119.1::g.26675::m.26675	99.0629	-0.905261	0.277186	-3.2659	0.00109117	0.0772677
Gene.159707::CIGENEomyV6.37601.3::g.159707::m.159707	92.9929	0.859976	0.263518	3.26344	0.00110068	0.0777227
Gene.316657::CIGENEomyV6.78961.2::g.316657::m.316657	135.679	0.824705	0.252757	3.26283	0.00110305	0.0777314
Gene.24139::CIGENEomyV6.3616.3::g.24139::m.24139	257.83	-0.633217	0.194394	-3.2574	0.00112439	0.0789187
Gene.87720::CIGENEomyV6.19815.1::g.87720::m.87720	1155.94	0.526829	0.161734	3.25738	0.00112447	0.0789187
Gene.251506::CIGENEomyV6.62422.3::g.251506::m.251506	1076.67	0.523632	0.160801	3.25641	0.00112831	0.0790275
Gene.295060::CIGENEomyV6.71944.1::g.295060::m.295060	336.974	-0.727662	0.223562	-3.25485	0.00113452	0.0793014
Gene.172583::CIGENEomyV6.41867.2::g.172583::m.172583	435.006	-0.811164	0.249315	-3.25357	0.00113965	0.0794994
Gene.154802::CIGENEomyV6.38499.1::g.154802::m.154802	115.482	-0.881945	0.271218	-3.2518	0.00114678	0.0797498
Gene.21427::CIGENEomyV6.3581.1::g.21427::m.21427	200.311	-0.780564	0.240145	-3.25039	0.00115248	0.0797498
Gene.224275::CIGENEomyV6.55983.1::g.224275::m.224275	843.448	-0.612818	0.188529	-3.25053	0.0011519	0.0797498
Gene.71432::CIGENEomyV6.17495.12::g.71432::m.71432	95.6131	0.599132	0.184283	3.25115	0.0011494	0.0797498
Gene.195641::CIGENEomyV6.45071.1::g.195641::m.195641	54.0469	-0.809319	0.249323	-3.24607	0.00117011	0.0808077
Gene.112770::CIGENEomyV6.26676.2::g.112770::m.112770	9.25297	-0.899614	0.277437	-3.24259	0.0011845	0.0816385
Gene.244537::CIGENEomyV6.59944.1::g.244537::m.244537	692.29	-0.440986	0.136039	-3.24161	0.00118855	0.0817541
Gene.233846::CIGENEomyV6.56395.1::g.233846::m.233846	1052.69	-0.738322	0.227957	-3.23887	0.00120006	0.0822185
Gene.291038::CIGENEomyV6.72671.1::g.291038::m.291038	5.6294	0.854918	0.263939	3.23908	0.00119918	0.0822185
Gene.190437::CIGENEomyV6.47091.1::g.190437::m.190437	72.6464	-0.884404	0.273162	-3.23765	0.00120518	0.0824059
Gene.159133::CIGENEomyV6.37288.1::g.159133::m.159133	26.266	-0.839401	0.259398	-3.23596	0.00121236	0.0827326
Gene.289418::CIGENEomyV6.69553.1::g.289418::m.289418	62.5439	-0.852875	0.26364	-3.23499	0.00121645	0.0828484
Gene.186536::CIGENEomyV6.45980.2::g.186536::m.186536	601.086	-0.541864	0.167568	-3.2337	0.00122199	0.0830455
Gene.279061::CIGENEomyV6.66836.1::g.279061::m.279061	47.9363	-0.883606	0.273292	-3.23319	0.00122416	0.0830455
Gene.126666::CIGENEomyV6.32085.2::g.126666::m.126666	557.149	-0.665838	0.206079	-3.23099	0.00123363	0.0833604
Gene.26146::CIGENEomyV6.4586.1::g.26146::m.26146	10.849	-0.90023	0.278604	-3.23122	0.00123263	0.0833604
Gene.365961::CIGENEomyV6.95671.1::g.365961::m.365961	53.0513	-0.724021	0.224205	-3.22929	0.00124099	0.083694
Gene.114240::CIGENEomyV6.26581.1::g.114240::m.114240	6.70231	-0.890251	0.27608	-3.22462	0.00126141	0.0845757
Gene.128266::CIGENEomyV6.32755.1::g.128266::m.128266	176.362	0.871309	0.270159	3.22518	0.00125895	0.0845757
Gene.295863::CIGENEomyV6.71425.1::g.295863::m.295863	1050.02	0.617292	0.191406	3.22504	0.00125954	0.0845757
Gene.339517::CIGENEomyV6.82151.1::g.339517::m.339517	412.292	0.714272	0.221604	3.22319	0.00126769	0.0848322
Gene.253462::CIGENEomyV6.60902.1::g.253462::m.253462	98.6032	0.873027	0.271278	3.2182	0.00129	0.086017
Gene.261072::CIGENEomyV6.63228.1::g.261072::m.261072	16.2184	0.895862	0.278398	3.21792	0.00129126	0.086017
Gene.73086::CIGENEomyV6.17297.2::g.73086::m.73086	40.1662	-0.879103	0.27322	-3.21756	0.00129287	0.086017
Gene.105268::CIGENEomyV6.25002.1::g.105268::m.105268	314.869	-0.509534	0.158449	-3.21576	0.00130099	0.0863907
Gene.123586::CIGENEomyV6.31895.1::g.123586::m.123586	186.088	0.624458	0.194346	3.21312	0.00131299	0.0866833
Gene.181989::CIGENEomyV6.45117.1::g.181989::m.181989	56.5229	0.807419	0.251224	3.21394	0.00130925	0.0866833
Gene.29909::CIGENEomyV6.4688.1::g.29909::m.29909	159.473	0.695294	0.21645	3.21226	0.00131695	0.0866833
Gene.339528::CIGENEomyV6.82583.2::g.339528::m.339528	390.358	-0.610051	0.189921	-3.21214	0.00131752	0.0866833
Gene.369721::CIGENEomyV6.98416.1::g.369721::m.369721	19.483	-0.87097	0.271158	-3.21204	0.00131795	0.0866833
Gene.104846::CIGENEomyV6.26358.1::g.104846::m.104846	16.7121	0.870872	0.271304	3.20994	0.00132761	0.08692
Gene.14574::CIGENEomyV6.6466.12::g.14574::m.14574	1645.7	0.528345	0.164613	3.20962	0.0013291	0.08692
Gene.340682::CIGENEomyV6.84460.1::g.340682::m.340682	76.4225	0.756314	0.235604	3.21011	0.00132683	0.08692
Gene.161539::CIGENEomyV6.38691.1::g.161539::m.161539	77.0112	0.676506	0.210896	3.20778	0.00133766	0.0873146
Gene.28656::CIGENEomyV6.6391.1::g.28656::m.28656	956.194	0.845557	0.263684	3.20671	0.00134265	0.0874746
Gene.205004::CIGENEomyV6.50516.1::g.205004::m.205004	359.472	-0.652921	0.204056	-3.19972	0.00137563	0.0894247
Gene.66311::CIGENEomyV6.16884.1::g.66311::m.66311	17.6791	-0.804212	0.251373	-3.19927	0.00137776	0.0894247
Gene.78763::CIGENEomyV6.20842.1::g.78763::m.78763	10.0939	-0.887912	0.277666	-3.19777	0.00138493	0.0897219
Gene.41318::CIGENEomyV6.8659.3::g.41318::m.41318	219.773	0.715452	0.223789	3.19699	0.00138872	0.0897986
Gene.3986::CIGENEomyV6.1469.1::g.3986::m.3986	83.6997	-0.747095	0.23376	-3.19599	0.0013935	0.0899397
Gene.274414::CIGENEomyV6.66942.1::g.274414::m.274414	980.474	0.52527	0.164563	3.19191	0.00141333	0.0910493
Gene.131007::CIGENEomyV6.32753.1::g.131007::m.131007	80.3409	0.833997	0.262071	3.18233	0.00146093	0.0937223
Gene.166968::CIGENEomyV6.42946.3::g.166968::m.166968	2278.41	-0.687142	0.215951	-3.18193	0.00146297	0.0937223
Gene.177580::CIGENEomyV6.42407.1::g.177580::m.177580	134.389	0.760749	0.239021	3.18277	0.00145871	0.0937223
Gene.258897::CIGENEomyV6.62387.1::g.258897::m.258897	608.821	0.453339	0.142512	3.18105	0.00146743	0.093834
Gene.280041::CIGENEomyV6.67848.3::g.280041::m.280041	592.181	-0.617773	0.194284	-3.17974	0.00147408	0.0939113
Gene.9536::CIGENEomyV6.3335.1::g.9536::m.9536	4.57027	-0.848311	0.266747	-3.18021	0.00147168	0.0939113
Gene.66907::CIGENEomyV6.18719.3::g.66907::m.66907	167.049	-0.487627	0.1534	-3.17879	0.00147893	0.094047
Gene.291330::CIGENEomyV6.71002.1::g.291330::m.291330	23.8939	-0.883135	0.278162	-3.17489	0.00149892	0.0951428
Gene.325505::CIGENEomyV6.77118.1::g.325505::m.325505	154.283	0.764631	0.240979	3.17302	0.00150861	0.0954069
Gene.54262::CIGENEomyV6.14050.1::g.54262::m.54262	47.0553	-0.874415	0.275567	-3.17315	0.00150793	0.0954069
Gene.332129::CIGENEomyV6.80904.1::g.332129::m.332129	729.066	-0.533983	0.168522	-3.16863	0.0015316	0.0966838
Gene.18681::CIGENEomyV6.6614.3::g.18681::m.18681	42.0659	-0.762419	0.240665	-3.16796	0.00153512	0.0967293
Gene.175694::CIGENEomyV6.40791.1::g.175694::m.175694	62.4087	0.699206	0.22099	3.16397	0.00155631	0.0971606
Gene.17936::CIGENEomyV6.7310.1::g.17936::m.17936	38.3335	-0.883957	0.27947	-3.16297	0.00156166	0.0971606
Gene.249738::CIGENEomyV6.58964.1::g.249738::m.249738	144.938	0.752569	0.237856	3.16397	0.00155634	0.0971606
Gene.267983::CIGENEomyV6.65438.1::g.267983::m.267983	1375.09	0.5138	0.162309	3.16557	0.00154778	0.0971606
Gene.314774::CIGENEomyV6.76527.1::g.314774::m.314774	78.2869	0.793736	0.250937	3.16309	0.00156107	0.0971606
Gene.332571::CIGENEomyV6.82272.1::g.332571::m.332571	213.394	-0.771643	0.243949	-3.16314	0.00156079	0.0971606
Gene.47118::CIGENEomyV6.10282.1::g.47118::m.47118	616.457	-0.636321	0.20099	-3.16593	0.0015459	0.0971606
Gene.301824::CIGENEomyV6.73517.1::g.301824::m.301824	144.939	0.845293	0.267293	3.16242	0.00156464	0.0971707
Gene.326257::CIGENEomyV6.80996.1::g.326257::m.326257	554.868	0.721366	0.228252	3.1604	0.00157555	0.0974976
Gene.334535::CIGENEomyV6.81780.1::g.334535::m.334535	1484.16	0.506396	0.160216	3.16071	0.00157385	0.0974976
Gene.319791::CIGENEomyV6.77765.2::g.319791::m.319791	322.348	-0.790317	0.250205	-3.15867	0.00158488	0.0978998
Gene.350071::CIGENEomyV6.86410.1::g.350071::m.350071	61.6308	0.667267	0.211289	3.15808	0.00158813	0.0979252
Gene.287766::CIGENEomyV6.68474.1::g.287766::m.287766	53.7156	0.662346	0.209808	3.15691	0.0015945	0.098143
Gene.251951::CIGENEomyV6.61681.2::g.251951::m.251951	721.727	-0.700066	0.221935	-3.15437	0.00160846	0.0987191
Gene.289453::CIGENEomyV6.70348.2::g.289453::m.289453	142.008	-0.593056	0.188025	-3.15414	0.00160974	0.0987191
Gene.366680::CIGENEomyV6.96130.1::g.366680::m.366680	54.2464	-0.670232	0.212534	-3.15353	0.00161309	0.0987191
Gene.71800::CIGENEomyV6.18727.1::g.71800::m.71800	2152.6	0.570743	0.181008	3.15313	0.0016153	0.0987191
Gene.298294::CIGENEomyV6.71173.1::g.298294::m.298294	588.768	-0.802338	0.2547	-3.15013	0.00163197	0.0990069
Gene.361621::CIGENEomyV6.92101.1::g.361621::m.361621	97.9374	0.769661	0.24431	3.15034	0.00163081	0.0990069
Gene.376148::CIGENEomyV6.103395.2::g.376148::m.376148	12.1827	0.878189	0.278715	3.15085	0.00162797	0.0990069
Gene.52908::CIGENEomyV6.13958.3::g.52908::m.52908	452.536	-0.478172	0.151717	-3.15174	0.00162301	0.0990069
Gene.52988::CIGENEomyV6.14971.1::g.52988::m.52988	82.87	0.831159	0.263885	3.14971	0.00163434	0.0990069
Gene.166901::CIGENEomyV6.43092.1::g.166901::m.166901	5.12502	0.867089	0.275375	3.14876	0.00163966	0.0991552
Gene.128126::CIGENEomyV6.31997.1::g.128126::m.128126	4016.9	0.664524	0.211185	3.14664	0.00165157	0.0993533
Gene.334899::CIGENEomyV6.82248.1::g.334899::m.334899	172.576	0.528159	0.167822	3.14714	0.00164875	0.0993533
Gene.93329::CIGENEomyV6.22466.1::g.93329::m.93329	163.458	0.837738	0.266228	3.1467	0.00165124	0.0993533
Gene.258692::CIGENEomyV6.61772.1::g.258692::m.258692	154.366	0.721132	0.229359	3.14412	0.00166589	0.099932
Gene.316492::CIGENEomyV6.78724.6::g.316492::m.316492	2627.14	-0.603289	0.19189	-3.14393	0.00166698	0.099932
Gene.304783::CIGENEomyV6.73238.1::g.304783::m.304783	2929.55	-0.753786	0.239977	-3.14107	0.00168329	0.100735
Gene.271978::CIGENEomyV6.64144.1::g.271978::m.271978	62.0439	0.7137	0.227393	3.13862	0.00169746	0.101407
Gene.167838::CIGENEomyV6.43190.1::g.167838::m.167838	126.928	0.722268	0.230356	3.13544	0.00171594	0.102334
Gene.241092::CIGENEomyV6.59023.1::g.241092::m.241092	3956.87	-0.708609	0.226182	-3.13291	0.00173082	0.102865
Gene.257771::CIGENEomyV6.62210.1::g.257771::m.257771	39.819	-0.854701	0.272858	-3.13241	0.00173378	0.102865
Gene.361275::CIGENEomyV6.91861.1::g.361275::m.361275	31.1495	-0.8487	0.270922	-3.13264	0.00173244	0.102865
Gene.103117::CIGENEomyV6.23022.1::g.103117::m.103117	19.6796	0.876575	0.279944	3.13125	0.00174065	0.102922
Gene.71089::CIGENEomyV6.17232.1::g.71089::m.71089	1592.12	-0.597911	0.19095	-3.13124	0.00174071	0.102922
Gene.259747::CIGENEomyV6.63235.1::g.259747::m.259747	20.1732	-0.802526	0.256456	-3.1293	0.00175226	0.103428
Gene.68849::CIGENEomyV6.16803.2::g.68849::m.68849	186.056	-0.718973	0.230306	-3.12182	0.00179738	0.105911
Gene.174665::CIGENEomyV6.40706.1::g.174665::m.174665	329.846	0.585796	0.187716	3.12064	0.00180456	0.105972
Gene.301230::CIGENEomyV6.73652.1::g.301230::m.301230	134.221	0.70492	0.225889	3.12064	0.00180457	0.105972
Gene.121884::CIGENEomyV6.27792.1::g.121884::m.121884	680.285	0.804916	0.2581	3.11863	0.00181695	0.106519
Gene.103981::CIGENEomyV6.25076.2::g.103981::m.103981	448.094	0.802422	0.257377	3.11769	0.00182275	0.106677
Gene.152246::CIGENEomyV6.37087.3::g.152246::m.152246	892.248	-0.565053	0.181412	-3.11474	0.00184105	0.107384
Gene.256478::CIGENEomyV6.63171.2::g.256478::m.256478	3963.24	-0.393637	0.12636	-3.11521	0.00183813	0.107384
Gene.158970::CIGENEomyV6.39661.2::g.158970::m.158970	5533.51	-0.371223	0.119268	-3.11251	0.00185507	0.108019
Gene.100281::CIGENEomyV6.24949.1::g.100281::m.100281	194.181	-0.456848	0.146855	-3.11089	0.00186527	0.108431
Gene.163699::CIGENEomyV6.40387.1::g.163699::m.163699	783.467	0.490786	0.157882	3.10856	0.00187999	0.108563
Gene.252672::CIGENEomyV6.62121.1::g.252672::m.252672	247.255	0.515098	0.16566	3.10937	0.00187485	0.108563
Gene.286822::CIGENEomyV6.70343.1::g.286822::m.286822	726.498	0.465329	0.149693	3.10855	0.00188008	0.108563
Gene.80508::CIGENEomyV6.20142.1::g.80508::m.80508	144.435	0.691998	0.222611	3.10854	0.00188012	0.108563
Gene.259750::CIGENEomyV6.62235.1::g.259750::m.259750	560.691	0.788663	0.253816	3.10723	0.00188849	0.108864
Gene.134365::CIGENEomyV6.32837.1::g.134365::m.134365	16.2991	-0.867847	0.279478	-3.10524	0.00190123	0.109269
Gene.73852::CIGENEomyV6.18709.1::g.73852::m.73852	5.60195	-0.841643	0.271048	-3.10515	0.00190184	0.109269
Gene.373502::CIGENEomyV6.101144.1::g.373502::m.373502	22.456	0.794504	0.25607	3.10268	0.00191775	0.11
Gene.184388::CIGENEomyV6.45380.4::g.184388::m.184388	91.7083	0.767873	0.247695	3.10007	0.00193474	0.110242
Gene.212987::CIGENEomyV6.52166.1::g.212987::m.212987	2396.21	0.706561	0.227908	3.1002	0.00193388	0.110242
Gene.239031::CIGENEomyV6.58163.1::g.239031::m.239031	15.0898	-0.799954	0.258029	-3.10026	0.00193354	0.110242
Gene.275659::CIGENEomyV6.67127.1::g.275659::m.275659	1035.1	-0.625784	0.201785	-3.10124	0.00192713	0.110242
Gene.258800::CIGENEomyV6.61983.1::g.258800::m.258800	537.695	0.361352	0.116606	3.0989	0.0019424	0.110496
Gene.194006::CIGENEomyV6.45805.2::g.194006::m.194006	390.419	-0.396287	0.12796	-3.09697	0.00195513	0.110873
Gene.63821::CIGENEomyV6.17452.2::g.63821::m.63821	167.181	0.833032	0.268987	3.09692	0.00195545	0.110873
Gene.275475::CIGENEomyV6.66771.1::g.275475::m.275475	20.8724	0.79627	0.257243	3.0954	0.00196547	0.111077
Gene.63969::CIGENEomyV6.15346.1::g.63969::m.63969	18.9876	0.842613	0.272177	3.09583	0.00196265	0.111077
Gene.321320::CIGENEomyV6.78919.1::g.321320::m.321320	37.3874	0.849029	0.274423	3.09387	0.00197565	0.111469
Gene.103056::CIGENEomyV6.23082.3::g.103056::m.103056	16.6563	-0.865832	0.279951	-3.0928	0.00198276	0.111499
Gene.25157::CIGENEomyV6.4533.3::g.25157::m.25157	1171.46	-0.481924	0.155844	-3.09234	0.00198586	0.111499
Gene.341263::CIGENEomyV6.84761.1::g.341263::m.341263	480.198	0.766246	0.247755	3.09275	0.00198309	0.111499
Gene.48874::CIGENEomyV6.12504.1::g.48874::m.48874	75.0773	-0.602539	0.194898	-3.09156	0.00199109	0.111611
Gene.300690::CIGENEomyV6.73764.1::g.300690::m.300690	390.508	0.698172	0.225868	3.09105	0.00199447	0.111619
Gene.50012::CIGENEomyV6.13047.1::g.50012::m.50012	184.679	0.668975	0.21652	3.08967	0.00200381	0.111961
Gene.42638::CIGENEomyV6.8568.1::g.42638::m.42638	573.523	-0.689085	0.223116	-3.08846	0.00201199	0.112236
Gene.109344::CIGENEomyV6.27046.1::g.109344::m.109344	330.751	-0.857225	0.277936	-3.08425	0.00204066	0.112305
Gene.123246::CIGENEomyV6.28843.2::g.123246::m.123246	737.832	0.577497	0.187257	3.08398	0.0020425	0.112305
Gene.130207::CIGENEomyV6.32889.1::g.130207::m.130207	26.7891	0.857477	0.277875	3.08584	0.00202977	0.112305
Gene.189279::CIGENEomyV6.44985.1::g.189279::m.189279	21.1681	-0.848088	0.274884	-3.08526	0.00203374	0.112305
Gene.273210::CIGENEomyV6.64307.1::g.273210::m.273210	3778.75	-0.68354	0.22161	-3.08442	0.00203948	0.112305
Gene.277020::CIGENEomyV6.67469.1::g.277020::m.277020	398.365	-0.673713	0.218259	-3.08677	0.00202346	0.112305
Gene.301642::CIGENEomyV6.72866.1::g.301642::m.301642	275.779	0.675911	0.218951	3.08704	0.00202162	0.112305
Gene.304697::CIGENEomyV6.72873.2::g.304697::m.304697	38.0884	0.680121	0.22043	3.08544	0.00203254	0.112305
Gene.316693::CIGENEomyV6.76926.1::g.316693::m.316693	5.65099	0.827202	0.268076	3.0857	0.00203074	0.112305
Gene.136584::CIGENEomyV6.30577.1::g.136584::m.136584	77.2764	-0.754865	0.244921	-3.08207	0.00205566	0.112632
Gene.349704::CIGENEomyV6.86241.1::g.349704::m.349704	5.60458	0.839867	0.272534	3.0817	0.00205823	0.112632
Gene.77581::CIGENEomyV6.19063.1::g.77581::m.77581	1073.39	0.815771	0.264657	3.08237	0.00205356	0.112632
Gene.250975::CIGENEomyV6.61221.2::g.250975::m.250975	31.6048	-0.808703	0.26266	-3.0789	0.00207767	0.113516
Gene.345153::CIGENEomyV6.84783.3::g.345153::m.345153	678.475	0.4434	0.144041	3.07829	0.00208195	0.11357
Gene.333596::CIGENEomyV6.82210.1::g.333596::m.333596	138.877	0.756519	0.245882	3.07675	0.00209269	0.113976
Gene.31567::CIGENEomyV6.10769.1::g.31567::m.31567	41.97	-0.760103	0.247165	-3.07528	0.00210304	0.114359
Gene.103792::CIGENEomyV6.25336.2::g.103792::m.103792	16.8429	-0.858705	0.279424	-3.07312	0.00211834	0.11501
Gene.33296::CIGENEomyV6.8880.1::g.33296::m.33296	54.7568	0.714972	0.232747	3.07188	0.00212714	0.115306
Gene.233138::CIGENEomyV6.54937.1::g.233138::m.233138	13.9208	-0.859506	0.279918	-3.07056	0.00213657	0.115613
Gene.239395::CIGENEomyV6.59733.1::g.239395::m.239395	388.056	0.675618	0.22006	3.07015	0.00213948	0.115613
Gene.107459::CIGENEomyV6.23574.1::g.107459::m.107459	15.758	0.857464	0.27943	3.06862	0.00215051	0.115782
Gene.146427::CIGENEomyV6.35454.5::g.146427::m.146427	127.087	0.766959	0.250016	3.06764	0.00215758	0.115782
Gene.219377::CIGENEomyV6.52312.1::g.219377::m.219377	250.349	-0.558128	0.181921	-3.06797	0.00215515	0.115782
Gene.313544::CIGENEomyV6.77482.3::g.313544::m.313544	98.4751	0.650546	0.212117	3.06692	0.00216274	0.115782
Gene.41019::CIGENEomyV6.10410.1::g.41019::m.41019	117.735	-0.576319	0.187892	-3.06728	0.00216014	0.115782
Gene.72462::CIGENEomyV6.17808.1::g.72462::m.72462	2093.94	0.38389	0.125121	3.06815	0.0021539	0.115782
Gene.46660::CIGENEomyV6.10669.1::g.46660::m.46660	46.9908	0.703128	0.229377	3.06538	0.0021739	0.116199
Gene.153498::CIGENEomyV6.38962.1::g.153498::m.153498	66.8777	0.674279	0.220062	3.06404	0.00218372	0.116364
Gene.247258::CIGENEomyV6.58229.1::g.247258::m.247258	39.185	0.777368	0.253705	3.06406	0.00218354	0.116364
Gene.138693::CIGENEomyV6.34914.1::g.138693::m.138693	596.035	0.57237	0.186985	3.06105	0.00220565	0.117352
Gene.121384::CIGENEomyV6.29597.2::g.121384::m.121384	23.8885	-0.823959	0.269349	-3.05908	0.00222019	0.117885
Gene.152081::CIGENEomyV6.39131.1::g.152081::m.152081	672.545	0.738009	0.241313	3.05831	0.00222592	0.117885
Gene.52555::CIGENEomyV6.14870.1::g.52555::m.52555	529.845	-0.612369	0.200204	-3.05872	0.00222284	0.117885
Gene.33159::CIGENEomyV6.7639.1::g.33159::m.33159	2340.67	-0.810422	0.265045	-3.05768	0.00223059	0.117951
Gene.12720::CIGENEomyV6.2593.3::g.12720::m.12720	100.993	-0.602759	0.197225	-3.0562	0.00224162	0.118092
Gene.172232::CIGENEomyV6.41806.3::g.172232::m.172232	128.492	0.696089	0.227839	3.05518	0.00224922	0.118092
Gene.221348::CIGENEomyV6.53483.1::g.221348::m.221348	21.3514	-0.837422	0.274112	-3.05503	0.00225035	0.118092
Gene.292011::CIGENEomyV6.71291.1::g.292011::m.292011	40.6084	0.784476	0.256722	3.05574	0.00224504	0.118092
Gene.59141::CIGENEomyV6.14744.1::g.59141::m.59141	551.676	-0.445848	0.145894	-3.05596	0.00224339	0.118092
Gene.192836::CIGENEomyV6.45118.2::g.192836::m.192836	1838.1	-0.543965	0.178129	-3.05378	0.0022598	0.118256
Gene.305331::CIGENEomyV6.73717.1::g.305331::m.305331	28.3808	-0.837301	0.274191	-3.05371	0.00226032	0.118256
Gene.103995::CIGENEomyV6.23752.1::g.103995::m.103995	1068.01	-0.634633	0.207861	-3.05316	0.00226442	0.118291
Gene.311387::CIGENEomyV6.75180.1::g.311387::m.311387	79.9581	0.683915	0.224081	3.05209	0.00227256	0.118537
Gene.119184::CIGENEomyV6.27668.1::g.119184::m.119184	999.388	0.615979	0.202074	3.04829	0.0023015	0.118822
Gene.121348::CIGENEomyV6.27309.1::g.121348::m.121348	65.3596	0.763251	0.250341	3.04884	0.00229723	0.118822
Gene.122494::CIGENEomyV6.27538.1::g.122494::m.122494	92.4148	-0.630402	0.206843	-3.04773	0.00230581	0.118822
Gene.144916::CIGENEomyV6.34884.1::g.144916::m.144916	503.238	0.612829	0.200974	3.0493	0.00229377	0.118822
Gene.174755::CIGENEomyV6.39786.1::g.174755::m.174755	122.841	-0.814736	0.267056	-3.0508	0.00228229	0.118822
Gene.189287::CIGENEomyV6.46242.1::g.189287::m.189287	3275.19	0.549525	0.180358	3.04686	0.00231244	0.118822
Gene.341158::CIGENEomyV6.85698.1::g.341158::m.341158	59.5339	-0.812648	0.266645	-3.04767	0.00230621	0.118822
Gene.65922::CIGENEomyV6.16109.4::g.65922::m.65922	1623.2	-0.683324	0.224261	-3.047	0.00231138	0.118822
Gene.88652::CIGENEomyV6.20671.1::g.88652::m.88652	44.2148	-0.852671	0.279743	-3.04805	0.00230335	0.118822
Gene.9369::CIGENEomyV6.2291.1::g.9369::m.9369	22.9615	-0.725718	0.237995	-3.0493	0.00229379	0.118822
Gene.282821::CIGENEomyV6.68992.1::g.282821::m.282821	89.8661	-0.59156	0.194246	-3.04542	0.00232353	0.119201
Gene.63814::CIGENEomyV6.15931.1::g.63814::m.63814	828.21	-0.466552	0.153218	-3.04501	0.00232672	0.119201
Gene.141388::CIGENEomyV6.34524.1::g.141388::m.141388	266.576	0.521523	0.171352	3.04357	0.00233788	0.119345
Gene.278098::CIGENEomyV6.67596.1::g.278098::m.278098	275.945	0.533088	0.175158	3.04346	0.00233871	0.119345
Gene.316466::CIGENEomyV6.78284.1::g.316466::m.316466	11.9481	-0.758902	0.249367	-3.04331	0.00233989	0.119345
Gene.108112::CIGENEomyV6.28925.4::g.108112::m.108112	765.828	-0.485684	0.159743	-3.04041	0.00236254	0.120307
Gene.236193::CIGENEomyV6.60633.1::g.236193::m.236193	104.611	-0.705099	0.232055	-3.0385	0.0023776	0.120307
Gene.272976::CIGENEomyV6.65529.1::g.272976::m.272976	217.939	0.656937	0.216218	3.0383	0.00237915	0.120307
Gene.292539::CIGENEomyV6.71290.1::g.292539::m.292539	74.4584	0.665994	0.219091	3.0398	0.00236733	0.120307
Gene.3427::CIGENEomyV6.3146.1::g.3427::m.3427	684.203	-0.374413	0.123234	-3.03824	0.00237966	0.120307
Gene.57672::CIGENEomyV6.12018.2::g.57672::m.57672	962.382	-0.445158	0.146459	-3.03948	0.0023699	0.120307
Gene.100071::CIGENEomyV6.23028.3::g.100071::m.100071	676.821	-0.739702	0.243833	-3.03364	0.00241626	0.121093
Gene.116621::CIGENEomyV6.27759.1::g.116621::m.116621	143.029	0.565462	0.186382	3.03388	0.00241432	0.121093
Gene.138962::CIGENEomyV6.34401.1::g.138962::m.138962	51.3154	0.726213	0.239344	3.03418	0.00241188	0.121093
Gene.181041::CIGENEomyV6.44451.1::g.181041::m.181041	47.5657	0.805095	0.265357	3.03401	0.00241325	0.121093
Gene.223280::CIGENEomyV6.56297.1::g.223280::m.223280	364.302	-0.600026	0.197833	-3.03299	0.00242142	0.121093
Gene.262674::CIGENEomyV6.61248.1::g.262674::m.262674	30.959	0.763602	0.251662	3.03424	0.00241143	0.121093
Gene.324542::CIGENEomyV6.76454.1::g.324542::m.324542	645.991	-0.811717	0.267439	-3.03515	0.00240413	0.121093
Gene.359478::CIGENEomyV6.90321.1::g.359478::m.359478	476.692	-0.580403	0.191378	-3.03276	0.00242325	0.121093
Gene.334141::CIGENEomyV6.82407.1::g.334141::m.334141	352.661	0.698597	0.230402	3.03208	0.00242875	0.121192
Gene.333255::CIGENEomyV6.82684.1::g.333255::m.333255	784.711	-0.401224	0.132357	-3.03139	0.00243431	0.121294
Gene.120313::CIGENEomyV6.29073.1::g.120313::m.120313	80.8675	0.596963	0.197142	3.02808	0.0024611	0.12189
Gene.144601::CIGENEomyV6.34577.1::g.144601::m.144601	1527.79	-0.557841	0.184265	-3.02738	0.00246682	0.12189
Gene.18283::CIGENEomyV6.6288.1::g.18283::m.18283	294.186	-0.544824	0.179959	-3.02749	0.00246593	0.12189
Gene.230744::CIGENEomyV6.55056.1::g.230744::m.230744	385.344	-0.466369	0.153984	-3.02869	0.0024562	0.12189
Gene.247012::CIGENEomyV6.58187.1::g.247012::m.247012	134.136	-0.717238	0.236923	-3.0273	0.00246745	0.12189
Gene.33618::CIGENEomyV6.9062.1::g.33618::m.33618	16.6373	0.839005	0.27697	3.02923	0.00245176	0.12189
Gene.165::CIGENEomyV6.824.5::g.165::m.165	1196.82	-0.492634	0.16293	-3.02359	0.00249796	0.122447
Gene.314493::CIGENEomyV6.79561.1::g.314493::m.314493	111.616	0.740817	0.245038	3.02328	0.00250053	0.122447
Gene.318163::CIGENEomyV6.78540.4::g.318163::m.318163	23.8558	0.788176	0.26076	3.02261	0.00250604	0.122447
Gene.352394::CIGENEomyV6.86758.1::g.352394::m.352394	318.314	-0.603903	0.199651	-3.0248	0.002488	0.122447
Gene.372141::CIGENEomyV6.100237.1::g.372141::m.372141	127.523	0.825658	0.273078	3.02353	0.00249847	0.122447
Gene.42050::CIGENEomyV6.10970.5::g.42050::m.42050	100.23	0.567859	0.187811	3.02357	0.00249815	0.122447
Gene.84917::CIGENEomyV6.19803.1::g.84917::m.84917	5.66919	-0.764085	0.252592	-3.02497	0.00248656	0.122447
Gene.88226::CIGENEomyV6.22638.1::g.88226::m.88226	549.484	0.700701	0.23183	3.02248	0.0025071	0.122447
Gene.19400::CIGENEomyV6.4884.1::g.19400::m.19400	1121.16	0.71407	0.23666	3.01728	0.00255054	0.12396
Gene.228597::CIGENEomyV6.56261.2::g.228597::m.228597	10.5415	-0.825762	0.273655	-3.01753	0.00254844	0.12396
Gene.49352::CIGENEomyV6.12553.1::g.49352::m.49352	542.807	0.660503	0.2189	3.01738	0.0025497	0.12396
Gene.70050::CIGENEomyV6.18038.1::g.70050::m.70050	349.205	0.644434	0.213597	3.01705	0.00255244	0.12396
Gene.377012::CIGENEomyV6.103963.16::g.377012::m.377012	11.258	-0.834772	0.276878	-3.01494	0.00257028	0.124651
Gene.30440::CIGENEomyV6.9076.1::g.30440::m.30440	62.0241	-0.722374	0.239685	-3.01385	0.00257958	0.124927
Gene.237950::CIGENEomyV6.58513.1::g.237950::m.237950	696.536	-0.499607	0.165827	-3.01282	0.00258829	0.125173
Gene.303404::CIGENEomyV6.72835.1::g.303404::m.303404	109.723	0.568886	0.188884	3.01182	0.00259683	0.125411
Gene.126864::CIGENEomyV6.30685.5::g.126864::m.126864	36.1015	-0.838945	0.278674	-3.01049	0.00260827	0.125442
Gene.179003::CIGENEomyV6.39881.2::g.179003::m.179003	250.704	-0.842547	0.279871	-3.01048	0.00260837	0.125442
Gene.266141::CIGENEomyV6.65644.3::g.266141::m.266141	695.481	0.629612	0.209096	3.01112	0.0026029	0.125442
Gene.59552::CIGENEomyV6.13097.2::g.59552::m.59552	494.56	-0.513633	0.17068	-3.00933	0.00261826	0.125742
Gene.216150::CIGENEomyV6.53721.1::g.216150::m.216150	279.503	-0.475579	0.15809	-3.00828	0.00262729	0.126
Gene.238880::CIGENEomyV6.57584.1::g.238880::m.238880	142.204	-0.681582	0.226641	-3.00732	0.00263559	0.126223
Gene.18001::CIGENEomyV6.4065.1::g.18001::m.18001	61.4073	0.802956	0.267071	3.00652	0.00264254	0.126381
Gene.318811::CIGENEomyV6.77567.1::g.318811::m.318811	20.6914	0.829843	0.276069	3.00593	0.00264769	0.126452
Gene.183918::CIGENEomyV6.45114.1::g.183918::m.183918	28.2253	0.836083	0.278359	3.00362	0.00266792	0.126489
Gene.213280::CIGENEomyV6.52052.1::g.213280::m.213280	743.679	0.706229	0.235154	3.00327	0.00267098	0.126489
Gene.304520::CIGENEomyV6.72909.1::g.304520::m.304520	94.7118	0.650525	0.216455	3.00536	0.00265266	0.126489
Gene.305097::CIGENEomyV6.74155.1::g.305097::m.305097	17.064	-0.84008	0.27961	-3.00447	0.00266041	0.126489
Gene.312628::CIGENEomyV6.76084.1::g.312628::m.312628	113.142	0.761864	0.253617	3.00399	0.00266464	0.126489
Gene.325639::CIGENEomyV6.78781.1::g.325639::m.325639	906.031	-0.378448	0.126042	-3.00256	0.00267719	0.126489
Gene.364075::CIGENEomyV6.94133.1::g.364075::m.364075	149.247	-0.839621	0.279641	-3.0025	0.00267776	0.126489
Gene.70793::CIGENEomyV6.17465.1::g.70793::m.70793	634.439	0.768485	0.255745	3.00489	0.00265679	0.126489
Gene.323617::CIGENEomyV6.77506.1::g.323617::m.323617	889.32	0.551624	0.183779	3.00157	0.00268592	0.126656
Gene.42086::CIGENEomyV6.9999.1::g.42086::m.42086	336.018	0.707808	0.235837	3.00126	0.00268864	0.126656
Gene.249970::CIGENEomyV6.59228.3::g.249970::m.249970	255.202	0.769346	0.2564	3.00057	0.00269479	0.126773
Gene.155853::CIGENEomyV6.37007.1::g.155853::m.155853	62.9477	0.803035	0.267727	2.99945	0.00270465	0.127063
Gene.310399::CIGENEomyV6.75287.1::g.310399::m.310399	241.989	0.589141	0.19648	2.99848	0.00271333	0.127298
Gene.117590::CIGENEomyV6.29973.1::g.117590::m.117590	1909.55	-0.547602	0.182654	-2.99803	0.00271735	0.127313
Gene.348886::CIGENEomyV6.85993.1::g.348886::m.348886	1221.74	-0.675252	0.225266	-2.99758	0.00272131	0.127326
Gene.198029::CIGENEomyV6.48729.1::g.198029::m.198029	322.801	-0.515673	0.172116	-2.99608	0.00273476	0.127395
Gene.230931::CIGENEomyV6.55903.1::g.230931::m.230931	35.827	0.803595	0.268262	2.99556	0.00273941	0.127395
Gene.322665::CIGENEomyV6.79641.1::g.322665::m.322665	20.4643	0.817497	0.27287	2.99593	0.00273613	0.127395
Gene.328141::CIGENEomyV6.80251.1::g.328141::m.328141	12.5547	-0.838272	0.279857	-2.99536	0.00274123	0.127395
Gene.94258::CIGENEomyV6.24358.3::g.94258::m.94258	364.352	0.808495	0.269867	2.9959	0.00273633	0.127395
Gene.140225::CIGENEomyV6.34946.1::g.140225::m.140225	223.045	0.672538	0.224638	2.99388	0.00275454	0.127754
Gene.315371::CIGENEomyV6.78085.1::g.315371::m.315371	396.627	0.518954	0.17335	2.99368	0.00275635	0.127754
Gene.222847::CIGENEomyV6.56320.1::g.222847::m.222847	53.548	0.825817	0.275947	2.99266	0.00276553	0.128008
Gene.340888::CIGENEomyV6.85014.1::g.340888::m.340888	147.531	0.614436	0.205496	2.99001	0.00278967	0.12878
Gene.348850::CIGENEomyV6.85739.4::g.348850::m.348850	55.2454	0.722023	0.241461	2.99023	0.00278771	0.12878
Gene.351881::CIGENEomyV6.87024.1::g.351881::m.351881	21.4519	-0.798675	0.26719	-2.98917	0.00279741	0.128965
Gene.174592::CIGENEomyV6.41868.2::g.174592::m.174592	37.8643	0.65051	0.217737	2.9876	0.00281181	0.129113
Gene.219611::CIGENEomyV6.52997.2::g.219611::m.219611	201.368	0.614777	0.205805	2.98719	0.00281558	0.129113
Gene.352237::CIGENEomyV6.87235.1::g.352237::m.352237	1313.15	0.544002	0.182107	2.98727	0.00281484	0.129113
Gene.361904::CIGENEomyV6.92364.1::g.361904::m.361904	22.9535	-0.761967	0.255074	-2.98724	0.0028151	0.129113
Gene.148642::CIGENEomyV6.34275.1::g.148642::m.148642	24.9152	-0.756022	0.253177	-2.98613	0.00282529	0.129215
Gene.39434::CIGENEomyV6.8559.1::g.39434::m.39434	1891.27	0.687021	0.230069	2.98615	0.00282516	0.129215
Gene.184783::CIGENEomyV6.46132.1::g.184783::m.184783	2173.46	-0.549088	0.183973	-2.98461	0.00283941	0.12939
Gene.325648::CIGENEomyV6.79207.1::g.325648::m.325648	13.939	0.835393	0.279893	2.98469	0.00283866	0.12939
Gene.361157::CIGENEomyV6.91742.1::g.361157::m.361157	10.6588	0.83259	0.278971	2.98451	0.00284037	0.12939
Gene.244502::CIGENEomyV6.59896.1::g.244502::m.244502	90.3942	-0.739712	0.247942	-2.98341	0.0028506	0.129427
Gene.301292::CIGENEomyV6.73195.1::g.301292::m.301292	433.872	-0.770653	0.25833	-2.98321	0.00285241	0.129427
Gene.374316::CIGENEomyV6.101885.1::g.374316::m.374316	11.6657	-0.823047	0.27583	-2.98389	0.00284611	0.129427
Gene.143281::CIGENEomyV6.34515.4::g.143281::m.143281	240.491	0.627941	0.210526	2.98273	0.00285692	0.129461
Gene.229998::CIGENEomyV6.56706.1::g.229998::m.229998	143.587	-0.662994	0.222343	-2.98185	0.00286508	0.129661
Gene.14911::CIGENEomyV6.5664.1::g.14911::m.14911	618.275	-0.675012	0.226413	-2.98133	0.00286998	0.129713
Gene.327330::CIGENEomyV6.81338.1::g.327330::m.327330	38.0948	-0.829855	0.278444	-2.98033	0.00287936	0.129797
Gene.6600::CIGENEomyV6.3140.1::g.6600::m.6600	2326.56	0.505363	0.169553	2.98056	0.0028772	0.129797
Gene.15321::CIGENEomyV6.5195.1::g.15321::m.15321	119.91	0.654768	0.219919	2.97731	0.00290787	0.129941
Gene.321979::CIGENEomyV6.77202.1::g.321979::m.321979	904.625	0.360971	0.121192	2.97851	0.00289657	0.129941
Gene.346517::CIGENEomyV6.85046.2::g.346517::m.346517	3853.88	-0.480961	0.161454	-2.97893	0.00289252	0.129941
Gene.356740::CIGENEomyV6.88045.1::g.356740::m.356740	16.8259	-0.819999	0.27533	-2.97824	0.00289911	0.129941
Gene.375308::CIGENEomyV6.102591.1::g.375308::m.375308	55.4336	-0.730284	0.245259	-2.9776	0.00290515	0.129941
Gene.87473::CIGENEomyV6.22262.1::g.87473::m.87473	77.1889	-0.785697	0.263904	-2.9772	0.00290889	0.129941
Gene.91073::CIGENEomyV6.20431.1::g.91073::m.91073	2724.96	-0.477928	0.160451	-2.97865	0.00289518	0.129941
Gene.147188::CIGENEomyV6.33939.1::g.147188::m.147188	18058.2	0.549468	0.184668	2.97543	0.00292574	0.130524
Gene.188354::CIGENEomyV6.44167.1::g.188354::m.188354	48.7501	0.790752	0.265841	2.97453	0.00293442	0.130743
Gene.274186::CIGENEomyV6.66024.1::g.274186::m.274186	1067.35	0.520899	0.175145	2.9741	0.00293846	0.130754
Gene.244806::CIGENEomyV6.59342.1::g.244806::m.244806	89.6834	0.6196	0.208371	2.97354	0.00294387	0.130826
Gene.140881::CIGENEomyV6.34784.1::g.140881::m.140881	801.297	-0.726946	0.244811	-2.96942	0.00298366	0.132202
Gene.212391::CIGENEomyV6.52984.4::g.212391::m.212391	453.886	0.714987	0.240856	2.96853	0.00299229	0.132202
Gene.225992::CIGENEomyV6.56281.1::g.225992::m.225992	739.602	0.7777	0.261997	2.96836	0.00299397	0.132202
Gene.276480::CIGENEomyV6.67040.1::g.276480::m.276480	301.761	-0.744876	0.25081	-2.96988	0.00297912	0.132202
Gene.285021::CIGENEomyV6.69347.2::g.285021::m.285021	609.077	-0.553343	0.18638	-2.96889	0.00298875	0.132202
Gene.138228::CIGENEomyV6.35917.1::g.138228::m.138228	385.393	-0.480352	0.161876	-2.9674	0.00300327	0.132274
Gene.70509::CIGENEomyV6.18093.1::g.70509::m.70509	119.554	0.697178	0.234917	2.96776	0.00299976	0.132274
Gene.207879::CIGENEomyV6.49801.1::g.207879::m.207879	750.899	-0.601084	0.202668	-2.96585	0.00301847	0.132597
Gene.208495::CIGENEomyV6.47815.1::g.208495::m.208495	15.7598	0.818529	0.276044	2.96521	0.00302475	0.132597
Gene.328255::CIGENEomyV6.80859.2::g.328255::m.328255	53.6014	0.589241	0.198726	2.96509	0.00302595	0.132597
Gene.355199::CIGENEomyV6.86742.1::g.355199::m.355199	255.433	0.685753	0.231223	2.96576	0.00301933	0.132597
Gene.138410::CIGENEomyV6.34239.4::g.138410::m.138410	48.1818	-0.824993	0.278463	-2.96267	0.00304984	0.133137
Gene.275308::CIGENEomyV6.68284.2::g.275308::m.275308	350.426	0.631247	0.213062	2.96273	0.0030492	0.133137
Gene.71439::CIGENEomyV6.16499.4::g.71439::m.71439	110.431	0.773973	0.261196	2.96319	0.00304471	0.133137
Gene.248829::CIGENEomyV6.58886.1::g.248829::m.248829	51.0702	0.720173	0.243157	2.96177	0.00305881	0.133199
Gene.276542::CIGENEomyV6.67952.1::g.276542::m.276542	28.2524	-0.77959	0.26325	-2.9614	0.00306243	0.133199
Gene.32651::CIGENEomyV6.9387.3::g.32651::m.32651	425.081	-0.534571	0.180515	-2.96136	0.00306283	0.133199
Gene.108426::CIGENEomyV6.28541.1::g.108426::m.108426	522.884	-0.472026	0.159435	-2.96062	0.00307022	0.133226
Gene.286102::CIGENEomyV6.70446.2::g.286102::m.286102	684.812	0.775755	0.262033	2.96052	0.00307117	0.133226
Gene.125906::CIGENEomyV6.32910.4::g.125906::m.125906	115.457	0.656213	0.221825	2.95824	0.00309403	0.133808
Gene.350264::CIGENEomyV6.86438.1::g.350264::m.350264	471.911	-0.467084	0.157928	-2.95758	0.00310063	0.133808
Gene.40486::CIGENEomyV6.8070.1::g.40486::m.40486	12.4327	0.812653	0.274748	2.95781	0.00309834	0.133808
Gene.53453::CIGENEomyV6.12228.1::g.53453::m.53453	41.7216	-0.812454	0.274733	-2.95725	0.00310397	0.133808
Gene.75403::CIGENEomyV6.16438.1::g.75403::m.75403	1548.45	-0.43314	0.14644	-2.95779	0.00309851	0.133808
Gene.210793::CIGENEomyV6.49941.1::g.210793::m.210793	3251.32	-0.578107	0.195603	-2.95551	0.00312151	0.134062
Gene.246239::CIGENEomyV6.59653.1::g.246239::m.246239	41.9725	-0.701746	0.23742	-2.95571	0.00311946	0.134062
Gene.3579::CIGENEomyV6.1560.2::g.3579::m.3579	227.296	0.73465	0.248529	2.95599	0.00311669	0.134062
Gene.57659::CIGENEomyV6.14497.3::g.57659::m.57659	672.654	-0.562671	0.190418	-2.95493	0.0031274	0.134148
Gene.329936::CIGENEomyV6.80346.1::g.329936::m.329936	501.174	0.415996	0.140866	2.95312	0.00314577	0.134769
Gene.122834::CIGENEomyV6.26583.1::g.122834::m.122834	7.05951	0.700958	0.237565	2.9506	0.0031716	0.134871
Gene.225271::CIGENEomyV6.54492.1::g.225271::m.225271	8.47544	0.786308	0.266379	2.95184	0.00315885	0.134871
Gene.313301::CIGENEomyV6.79218.1::g.313301::m.313301	23.0429	0.823145	0.27897	2.95066	0.00317093	0.134871
Gene.363869::CIGENEomyV6.93962.1::g.363869::m.363869	141.184	-0.814344	0.275938	-2.95118	0.00316564	0.134871
Gene.71925::CIGENEomyV6.15974.2::g.71925::m.71925	1298.81	-0.603222	0.204374	-2.95156	0.00316175	0.134871
Gene.80980::CIGENEomyV6.22178.1::g.80980::m.80980	471.62	-0.510827	0.173105	-2.95096	0.00316788	0.134871
Gene.132177::CIGENEomyV6.31863.2::g.132177::m.132177	568.282	-0.467722	0.158612	-2.94885	0.00318956	0.13534
Gene.214712::CIGENEomyV6.53006.4::g.214712::m.214712	1188.88	-0.563971	0.191257	-2.94876	0.00319047	0.13534
Gene.156055::CIGENEomyV6.38358.1::g.156055::m.156055	5290.38	-0.45435	0.154102	-2.94836	0.00319462	0.13535
Gene.294520::CIGENEomyV6.71095.1::g.294520::m.294520	131.675	0.636126	0.215807	2.94766	0.00320192	0.135493
Gene.214685::CIGENEomyV6.51265.1::g.214685::m.214685	52.5591	-0.769769	0.261195	-2.94711	0.0032076	0.135567
Gene.205351::CIGENEomyV6.47641.1::g.205351::m.205351	8.79583	0.824251	0.279742	2.94647	0.00321427	0.135683
Gene.122830::CIGENEomyV6.28558.1::g.122830::m.122830	2679.82	0.417355	0.14169	2.94556	0.00322372	0.135808
Gene.257156::CIGENEomyV6.61181.1::g.257156::m.257156	26.6857	-0.807873	0.274326	-2.94494	0.0032302	0.135808
Gene.59278::CIGENEomyV6.12698.4::g.59278::m.59278	753.462	0.550472	0.186938	2.94467	0.00323295	0.135808
Gene.75395::CIGENEomyV6.18880.1::g.75395::m.75395	41.4999	-0.807842	0.274325	-2.94484	0.00323122	0.135808
Gene.351518::CIGENEomyV6.85785.1::g.351518::m.351518	1569.41	0.527267	0.179114	2.94375	0.00324257	0.136046
Gene.184101::CIGENEomyV6.46057.1::g.184101::m.184101	89.2383	0.683307	0.232158	2.94329	0.00324747	0.136087
Gene.178333::CIGENEomyV6.42287.1::g.178333::m.178333	135.759	-0.569858	0.193651	-2.94271	0.00325355	0.136176
Gene.32148::CIGENEomyV6.10162.1::g.32148::m.32148	42.227	0.67153	0.228276	2.94174	0.0032637	0.136434
Gene.75375::CIGENEomyV6.15681.3::g.75375::m.75375	50.76	-0.806728	0.274269	-2.94137	0.00326762	0.136434
Gene.154826::CIGENEomyV6.37906.1::g.154826::m.154826	5.61282	0.70592	0.240272	2.93801	0.00330326	0.137084
Gene.18501::CIGENEomyV6.3649.3::g.18501::m.18501	503.57	-0.517274	0.176084	-2.93766	0.00330702	0.137084
Gene.202504::CIGENEomyV6.50081.1::g.202504::m.202504	7.43961	0.81272	0.276538	2.93891	0.00329366	0.137084
Gene.280776::CIGENEomyV6.67344.2::g.280776::m.280776	403.78	0.443721	0.151015	2.93826	0.00330065	0.137084
Gene.41943::CIGENEomyV6.9000.1::g.41943::m.41943	296.167	-0.594627	0.202354	-2.93856	0.00329745	0.137084
Gene.72036::CIGENEomyV6.16549.5::g.72036::m.72036	1027.16	-0.469398	0.159759	-2.93816	0.00330164	0.137084
Gene.148607::CIGENEomyV6.33609.1::g.148607::m.148607	138.309	-0.652825	0.222472	-2.93442	0.00334174	0.137206
Gene.186499::CIGENEomyV6.45712.1::g.186499::m.186499	24.6784	-0.798763	0.272083	-2.93573	0.00332763	0.137206
Gene.200232::CIGENEomyV6.48350.1::g.200232::m.200232	213.404	0.63377	0.215923	2.93517	0.00333361	0.137206
Gene.302779::CIGENEomyV6.73984.1::g.302779::m.302779	1010.93	-0.323529	0.110218	-2.93536	0.00333165	0.137206
Gene.352166::CIGENEomyV6.86383.2::g.352166::m.352166	20.8554	-0.781893	0.266283	-2.93632	0.00332133	0.137206
Gene.47821::CIGENEomyV6.14478.1::g.47821::m.47821	4227.68	0.530056	0.180533	2.93606	0.00332411	0.137206
Gene.48041::CIGENEomyV6.12642.1::g.48041::m.48041	900.822	-0.545945	0.186039	-2.93457	0.00334009	0.137206
Gene.93429::CIGENEomyV6.21066.1::g.93429::m.93429	194.648	0.628372	0.214138	2.93443	0.0033416	0.137206
Gene.226314::CIGENEomyV6.56143.1::g.226314::m.226314	619.251	-0.445279	0.15181	-2.93314	0.00335557	0.137419
Gene.228583::CIGENEomyV6.56188.1::g.228583::m.228583	227.324	-0.811899	0.276836	-2.93277	0.00335949	0.137419
Gene.244325::CIGENEomyV6.58871.1::g.244325::m.244325	43.2445	0.67224	0.229212	2.93283	0.00335883	0.137419
Gene.297275::CIGENEomyV6.71224.1::g.297275::m.297275	824.04	0.673836	0.229785	2.93246	0.00336285	0.137419
Gene.246685::CIGENEomyV6.60052.1::g.246685::m.246685	947.488	-0.352489	0.120226	-2.93187	0.00336924	0.137517
Gene.217704::CIGENEomyV6.53340.1::g.217704::m.217704	17.5747	-0.793249	0.270689	-2.93049	0.00338433	0.137645
Gene.354857::CIGENEomyV6.86904.1::g.354857::m.354857	1274.25	0.455129	0.155279	2.93105	0.00337822	0.137645
Gene.84507::CIGENEomyV6.21683.1::g.84507::m.84507	834.648	0.53181	0.18147	2.93057	0.00338342	0.137645
Gene.353408::CIGENEomyV6.86802.1::g.353408::m.353408	883.644	-0.40115	0.136937	-2.92946	0.00339557	0.13794
Gene.27530::CIGENEomyV6.4449.1::g.27530::m.27530	31.7658	-0.808453	0.276018	-2.92899	0.00340069	0.137986
Gene.202199::CIGENEomyV6.48105.2::g.202199::m.202199	3731.54	-0.45734	0.156221	-2.92752	0.00341682	0.138341
Gene.286797::CIGENEomyV6.69924.3::g.286797::m.286797	1646.85	0.621296	0.21223	2.92746	0.00341746	0.138341
Gene.205481::CIGENEomyV6.49652.1::g.205481::m.205481	2267.66	0.287429	0.0982391	2.92581	0.00343566	0.13859
Gene.277187::CIGENEomyV6.66989.1::g.277187::m.277187	360.762	0.784964	0.268274	2.92598	0.0034337	0.13859
Gene.349622::CIGENEomyV6.86770.1::g.349622::m.349622	260.759	0.625338	0.213707	2.92614	0.00343196	0.13859
Gene.36667::CIGENEomyV6.8187.1::g.36667::m.36667	7.87844	0.776289	0.265375	2.92526	0.00344172	0.138673
Gene.183633::CIGENEomyV6.46415.1::g.183633::m.183633	33.0534	-0.79631	0.272265	-2.92476	0.00344726	0.138734
Gene.251245::CIGENEomyV6.63227.1::g.251245::m.251245	22.8156	0.818666	0.279961	2.92422	0.00345326	0.138814
Gene.284071::CIGENEomyV6.69099.1::g.284071::m.284071	18.3956	0.766845	0.262403	2.9224	0.00347348	0.139464
Gene.227110::CIGENEomyV6.54407.1::g.227110::m.227110	753.716	0.467283	0.159968	2.9211	0.00348799	0.139771
Gene.291912::CIGENEomyV6.71822.1::g.291912::m.291912	14.8166	0.810838	0.27759	2.92099	0.00348921	0.139771
Gene.118630::CIGENEomyV6.26988.1::g.118630::m.118630	423.317	-0.488434	0.167245	-2.92047	0.00349501	0.139841
Gene.314005::CIGENEomyV6.78852.3::g.314005::m.314005	6.23128	-0.798598	0.273488	-2.92004	0.00349982	0.139871
Gene.273408::CIGENEomyV6.64996.1::g.273408::m.273408	16.6608	0.793816	0.27194	2.91909	0.00351058	0.140029
Gene.363105::CIGENEomyV6.93314.4::g.363105::m.363105	43.2983	0.753439	0.258118	2.91897	0.00351188	0.140029
Gene.120405::CIGENEomyV6.29773.1::g.120405::m.120405	1564.85	0.348646	0.119533	2.91672	0.0035373	0.14088
Gene.276895::CIGENEomyV6.67343.1::g.276895::m.276895	23.376	-0.788905	0.270539	-2.91605	0.00354495	0.141022
Gene.257667::CIGENEomyV6.61266.1::g.257667::m.257667	3734.44	0.441145	0.151318	2.91535	0.00355285	0.141174
Gene.336034::CIGENEomyV6.82595.1::g.336034::m.336034	14.9369	-0.802575	0.275426	-2.91395	0.00356892	0.141649
Gene.152123::CIGENEomyV6.38824.1::g.152123::m.152123	1684.58	0.389081	0.133659	2.911	0.00360278	0.142829
Gene.203411::CIGENEomyV6.49785.1::g.203411::m.203411	25.4588	0.775645	0.266772	2.90752	0.00364311	0.143563
Gene.21729::CIGENEomyV6.3906.1::g.21729::m.21729	4.65414	0.740103	0.25451	2.90795	0.00363801	0.143563
Gene.218981::CIGENEomyV6.52427.1::g.218981::m.218981	220.117	0.644881	0.221818	2.90725	0.00364623	0.143563
Gene.323926::CIGENEomyV6.79535.1::g.323926::m.323926	10.6718	0.81156	0.279039	2.90841	0.00363276	0.143563
Gene.373238::CIGENEomyV6.100918.1::g.373238::m.373238	376.676	0.594311	0.204322	2.9087	0.00362929	0.143563
Gene.73731::CIGENEomyV6.17085.1::g.73731::m.73731	146.408	-0.768407	0.264273	-2.90763	0.00364181	0.143563
Gene.13081::CIGENEomyV6.2262.1::g.13081::m.13081	88.5619	0.736633	0.253525	2.90557	0.00366585	0.143843
Gene.16543::CIGENEomyV6.6563.1::g.16543::m.16543	310.302	-0.408853	0.140711	-2.90561	0.00366532	0.143843
Gene.324611::CIGENEomyV6.79696.1::g.324611::m.324611	85.3933	-0.59015	0.203108	-2.9056	0.00366549	0.143843
Gene.284815::CIGENEomyV6.70404.1::g.284815::m.284815	14689	0.338033	0.116357	2.90515	0.00367075	0.143872
Gene.205426::CIGENEomyV6.50729.1::g.205426::m.205426	7.23917	0.805486	0.277397	2.90373	0.00368744	0.144281
Gene.282270::CIGENEomyV6.70815.1::g.282270::m.282270	39.9518	0.740019	0.254867	2.90355	0.00368956	0.144281
Gene.297140::CIGENEomyV6.72172.1::g.297140::m.297140	191.864	-0.640955	0.220798	-2.9029	0.0036972	0.144417
Gene.360484::CIGENEomyV6.91257.1::g.360484::m.360484	91.6922	-0.808525	0.278606	-2.90204	0.0037074	0.144652
Gene.113807::CIGENEomyV6.27838.1::g.113807::m.113807	1035.55	0.648017	0.223359	2.90123	0.00371705	0.144864
Gene.289007::CIGENEomyV6.69443.3::g.289007::m.289007	73.0327	0.576637	0.198861	2.8997	0.00373523	0.145409
Gene.148882::CIGENEomyV6.33478.2::g.148882::m.148882	782.063	0.513273	0.177054	2.89896	0.00374404	0.145578
Gene.279423::CIGENEomyV6.66841.2::g.279423::m.279423	380.412	0.626273	0.216058	2.89863	0.003748	0.145578
Gene.196423::CIGENEomyV6.46901.2::g.196423::m.196423	6.10752	0.755761	0.260805	2.8978	0.0037579	0.145798
Gene.224328::CIGENEomyV6.54736.2::g.224328::m.224328	4.91051	-0.781359	0.269979	-2.89414	0.00380195	0.147341
Gene.58447::CIGENEomyV6.13980.3::g.58447::m.58447	8.05838	0.786966	0.272034	2.8929	0.00381705	0.147761
Gene.10826::CIGENEomyV6.402.1::g.10826::m.10826	24.9473	-0.808953	0.279804	-2.89114	0.00383845	0.147885
Gene.144794::CIGENEomyV6.35856.20::g.144794::m.144794	56.108	-0.598065	0.206886	-2.8908	0.00384263	0.147885
Gene.240990::CIGENEomyV6.59401.1::g.240990::m.240990	31.4374	-0.800548	0.276826	-2.89188	0.00382947	0.147885
Gene.242898::CIGENEomyV6.57971.1::g.242898::m.242898	1885.67	-0.587478	0.203294	-2.88979	0.00385493	0.147885
Gene.286514::CIGENEomyV6.69498.1::g.286514::m.286514	383.029	-0.362418	0.125338	-2.89152	0.00383378	0.147885
Gene.294342::CIGENEomyV6.72279.1::g.294342::m.294342	17.9449	0.767598	0.265653	2.88948	0.00385881	0.147885
Gene.30926::CIGENEomyV6.8451.2::g.30926::m.30926	15.5026	-0.794942	0.27494	-2.89133	0.00383618	0.147885
Gene.43838::CIGENEomyV6.10153.1::g.43838::m.43838	153.554	0.753133	0.260633	2.88963	0.00385699	0.147885
Gene.98289::CIGENEomyV6.23352.4::g.98289::m.98289	46.9676	-0.790551	0.273507	-2.89043	0.00384719	0.147885
Gene.254298::CIGENEomyV6.62340.1::g.254298::m.254298	1209.13	0.38046	0.131717	2.88848	0.00387115	0.148104
Gene.370487::CIGENEomyV6.98901.1::g.370487::m.370487	15.8579	-0.776342	0.268787	-2.88832	0.00387309	0.148104
Gene.11900::CIGENEomyV6.1649.1::g.11900::m.11900	245.557	-0.790732	0.273932	-2.8866	0.00389429	0.148635
Gene.211194::CIGENEomyV6.53727.3::g.211194::m.211194	263.864	0.789255	0.273527	2.88548	0.00390822	0.148635
Gene.297342::CIGENEomyV6.72058.6::g.297342::m.297342	111.875	0.522752	0.18114	2.88591	0.00390287	0.148635
Gene.341556::CIGENEomyV6.84481.1::g.341556::m.341556	13.4625	-0.806558	0.279498	-2.88574	0.00390498	0.148635
Gene.68083::CIGENEomyV6.18186.2::g.68083::m.68083	9.81193	-0.807185	0.279743	-2.88545	0.00390849	0.148635
Gene.228041::CIGENEomyV6.57307.1::g.228041::m.228041	243.949	-0.447855	0.15524	-2.88492	0.00391517	0.148691
Gene.228067::CIGENEomyV6.55718.3::g.228067::m.228067	77.6623	0.587533	0.203722	2.88399	0.00392675	0.148691
Gene.51130::CIGENEomyV6.14480.1::g.51130::m.51130	14990.2	0.711768	0.246803	2.88395	0.00392719	0.148691
Gene.65214::CIGENEomyV6.17436.1::g.65214::m.65214	76.2881	-0.605635	0.209953	-2.88462	0.0039189	0.148691
Gene.263944::CIGENEomyV6.65500.1::g.263944::m.263944	12.7429	-0.806448	0.279691	-2.88336	0.00393463	0.148809
Gene.149732::CIGENEomyV6.33855.2::g.149732::m.149732	292.398	0.501919	0.174101	2.88291	0.00394018	0.148856
Gene.195219::CIGENEomyV6.47046.3::g.195219::m.195219	41.0183	0.698172	0.242212	2.88249	0.00394549	0.148894
Gene.135022::CIGENEomyV6.33274.3::g.135022::m.135022	68.936	-0.730193	0.253358	-2.88206	0.00395085	0.148933
Gene.207668::CIGENEomyV6.49994.1::g.207668::m.207668	15.44	0.806167	0.279797	2.88126	0.00396094	0.149151
Gene.123338::CIGENEomyV6.27901.1::g.123338::m.123338	165.32	0.616257	0.213914	2.88086	0.00396594	0.149176
Gene.372293::CIGENEomyV6.100321.1::g.372293::m.372293	5.51236	-0.766531	0.26611	-2.88051	0.00397036	0.14918
Gene.324340::CIGENEomyV6.78882.1::g.324340::m.324340	394.304	0.401695	0.139525	2.87902	0.00398908	0.149721
Gene.105798::CIGENEomyV6.26326.1::g.105798::m.105798	7.35023	0.796242	0.276674	2.87791	0.00400316	0.149932
Gene.248340::CIGENEomyV6.58387.1::g.248340::m.248340	555.89	-0.427662	0.148602	-2.87789	0.00400341	0.149932
Gene.172598::CIGENEomyV6.41141.1::g.172598::m.172598	148.458	-0.652172	0.226777	-2.87583	0.00402963	0.150425
Gene.317160::CIGENEomyV6.79820.1::g.317160::m.317160	60.6858	0.668539	0.232435	2.87624	0.00402443	0.150425
Gene.42840::CIGENEomyV6.9220.1::g.42840::m.42840	3188.89	-0.601255	0.209049	-2.87614	0.0040257	0.150425
Gene.340652::CIGENEomyV6.85083.1::g.340652::m.340652	135.099	-0.521842	0.181498	-2.8752	0.00403772	0.150564
Gene.377322::CIGENEomyV6.104137.2::g.377322::m.377322	4.93355	-0.705536	0.245521	-2.87363	0.00405782	0.15115
Gene.326361::CIGENEomyV6.80448.1::g.326361::m.326361	114.487	-0.642968	0.223776	-2.87326	0.00406254	0.151155
Gene.371966::CIGENEomyV6.100123.1::g.371966::m.371966	47.4201	0.593989	0.206753	2.87294	0.00406668	0.151155
Gene.76231::CIGENEomyV6.18015.1::g.76231::m.76231	75.7178	-0.711804	0.247835	-2.87209	0.0040777	0.151401
Gene.144370::CIGENEomyV6.34118.1::g.144370::m.144370	346.957	-0.437878	0.152535	-2.87067	0.004096	0.151441
Gene.177326::CIGENEomyV6.42169.1::g.177326::m.177326	5263.66	-0.737549	0.256924	-2.87069	0.00409573	0.151441
Gene.220621::CIGENEomyV6.53328.1::g.220621::m.220621	451.874	-0.602555	0.209941	-2.87012	0.00410319	0.151441
Gene.233952::CIGENEomyV6.55863.1::g.233952::m.233952	33.6279	0.784301	0.273274	2.87002	0.00410449	0.151441
Gene.240610::CIGENEomyV6.60253.1::g.240610::m.240610	388.161	-0.652267	0.227273	-2.86997	0.00410509	0.151441
Gene.326718::CIGENEomyV6.80849.2::g.326718::m.326718	204.632	0.558603	0.194586	2.87072	0.00409536	0.151441
Gene.124431::CIGENEomyV6.31196.2::g.124431::m.124431	1239.37	-0.537243	0.187267	-2.86887	0.00411943	0.151484
Gene.333521::CIGENEomyV6.81900.3::g.333521::m.333521	144.437	0.650462	0.226713	2.8691	0.00411639	0.151484
Gene.92124::CIGENEomyV6.21036.1::g.92124::m.92124	509.853	-0.535049	0.186476	-2.86926	0.00411429	0.151484
Gene.103053::CIGENEomyV6.25439.1::g.103053::m.103053	26.0516	0.749054	0.261177	2.86799	0.0041309	0.151583
Gene.347138::CIGENEomyV6.84936.1::g.347138::m.347138	72.7015	0.642622	0.224062	2.86806	0.00412996	0.151583
Gene.123908::CIGENEomyV6.30929.1::g.123908::m.123908	825.454	-0.480589	0.167613	-2.86725	0.00414058	0.151691
Gene.169819::CIGENEomyV6.42869.1::g.169819::m.169819	39.8645	-0.760229	0.265157	-2.86709	0.00414261	0.151691
Gene.72370::CIGENEomyV6.17557.1::g.72370::m.72370	309.544	0.677645	0.236382	2.86674	0.00414725	0.1517
Gene.139279::CIGENEomyV6.33545.1::g.139279::m.139279	42.5457	0.798829	0.278759	2.86566	0.00416136	0.151894
Gene.239658::CIGENEomyV6.58939.1::g.239658::m.239658	36.7819	-0.740036	0.258232	-2.86578	0.0041598	0.151894
Gene.20843::CIGENEomyV6.6936.1::g.20843::m.20843	59.4432	0.664738	0.232043	2.86471	0.00417387	0.151956
Gene.232587::CIGENEomyV6.56361.2::g.232587::m.232587	2048.32	0.640527	0.223622	2.86433	0.00417898	0.151956
Gene.353082::CIGENEomyV6.87307.1::g.353082::m.353082	75.8856	0.693302	0.242108	2.8636	0.00418852	0.151956
Gene.38372::CIGENEomyV6.10112.3::g.38372::m.38372	592.628	0.660533	0.230631	2.86403	0.00418293	0.151956
Gene.40036::CIGENEomyV6.9542.1::g.40036::m.40036	366.209	0.510115	0.178142	2.86353	0.00418946	0.151956
Gene.7474::CIGENEomyV6.1745.2::g.7474::m.7474	284.127	0.530966	0.185417	2.86364	0.00418807	0.151956
Gene.113472::CIGENEomyV6.28875.1::g.113472::m.113472	170.431	0.612285	0.214076	2.86013	0.00423473	0.152318
Gene.251565::CIGENEomyV6.63038.1::g.251565::m.251565	279.951	-0.484853	0.169488	-2.8607	0.00422706	0.152318
Gene.254871::CIGENEomyV6.61176.1::g.254871::m.254871	1613.48	-0.463477	0.162047	-2.86014	0.00423456	0.152318
Gene.290483::CIGENEomyV6.70016.1::g.290483::m.290483	104.602	-0.680771	0.237933	-2.86118	0.00422062	0.152318
Gene.301598::CIGENEomyV6.74000.1::g.301598::m.301598	32.9722	0.69772	0.24389	2.8608	0.0042257	0.152318
Gene.359798::CIGENEomyV6.90576.1::g.359798::m.359798	9.60095	0.794689	0.277691	2.86178	0.00421271	0.152318
Gene.375719::CIGENEomyV6.103005.1::g.375719::m.375719	69.5744	-0.797829	0.278772	-2.86194	0.00421056	0.152318
Gene.8224::CIGENEomyV6.3079.1::g.8224::m.8224	1255.63	-0.409863	0.143267	-2.86084	0.0042252	0.152318
Gene.207659::CIGENEomyV6.48895.1::g.207659::m.207659	1377	-0.495357	0.173291	-2.85853	0.00425608	0.152755
Gene.256591::CIGENEomyV6.63083.1::g.256591::m.256591	52.1874	0.728389	0.25484	2.85823	0.00426015	0.152755
Gene.330814::CIGENEomyV6.81585.4::g.330814::m.330814	16.3552	0.782253	0.273635	2.85874	0.00425324	0.152755
Gene.352802::CIGENEomyV6.86619.1::g.352802::m.352802	8513.03	-0.508443	0.177921	-2.85768	0.00426747	0.152859
Gene.10598::CIGENEomyV6.2688.1::g.10598::m.10598	178.476	0.698865	0.244667	2.8564	0.00428479	0.153032
Gene.14509::CIGENEomyV6.4088.1::g.14509::m.14509	1287.59	-0.60057	0.210283	-2.85601	0.00429004	0.153032
Gene.299490::CIGENEomyV6.73650.1::g.299490::m.299490	27.9122	0.780602	0.273235	2.85689	0.0042781	0.153032
Gene.312283::CIGENEomyV6.75757.3::g.312283::m.312283	116.185	0.505949	0.177143	2.85615	0.00428806	0.153032
Gene.174335::CIGENEomyV6.40105.1::g.174335::m.174335	87.1822	-0.557812	0.195455	-2.85392	0.00431833	0.153775
Gene.74455::CIGENEomyV6.16770.1::g.74455::m.74455	737.732	0.350961	0.122979	2.85381	0.00431978	0.153775
Gene.263717::CIGENEomyV6.65794.1::g.263717::m.263717	8.38103	0.782731	0.274698	2.84943	0.0043798	0.155751
Gene.332486::CIGENEomyV6.83018.1::g.332486::m.332486	45.3267	0.736789	0.258809	2.84685	0.00441544	0.156857
Gene.155062::CIGENEomyV6.38799.1::g.155062::m.155062	232.722	-0.476575	0.167539	-2.84457	0.0044472	0.157291
Gene.188803::CIGENEomyV6.44275.1::g.188803::m.188803	164.889	-0.572319	0.201237	-2.84401	0.004455	0.157291
Gene.232605::CIGENEomyV6.54926.2::g.232605::m.232605	1909.52	-0.685837	0.241142	-2.84412	0.0044534	0.157291
Gene.240914::CIGENEomyV6.59636.1::g.240914::m.240914	175.629	0.777564	0.273311	2.84497	0.00444151	0.157291
Gene.248472::CIGENEomyV6.59577.1::g.248472::m.248472	419.002	0.497373	0.174818	2.84509	0.0044399	0.157291
Gene.326285::CIGENEomyV6.81278.1::g.326285::m.326285	117.033	0.642276	0.225714	2.84553	0.00443375	0.157291
Gene.63722::CIGENEomyV6.18044.1::g.63722::m.63722	717.928	0.386541	0.135958	2.84308	0.00446798	0.157589
Gene.173120::CIGENEomyV6.42367.2::g.173120::m.173120	186.254	-0.694072	0.244196	-2.84227	0.00447931	0.157667
Gene.343848::CIGENEomyV6.85266.1::g.343848::m.343848	29.2159	-0.786092	0.276572	-2.84227	0.00447934	0.157667
Gene.329407::CIGENEomyV6.81635.3::g.329407::m.329407	809.491	-0.495042	0.174224	-2.84142	0.00449135	0.157704
Gene.35182::CIGENEomyV6.10241.1::g.35182::m.35182	215.892	0.605532	0.213092	2.84164	0.0044882	0.157704
Gene.74723::CIGENEomyV6.16475.1::g.74723::m.74723	1055.33	-0.403288	0.141942	-2.84122	0.00449408	0.157704
Gene.336054::CIGENEomyV6.82317.1::g.336054::m.336054	561.926	-0.593225	0.208918	-2.83951	0.0045183	0.158072
Gene.86312::CIGENEomyV6.22203.1::g.86312::m.86312	69.7558	0.614278	0.216332	2.83952	0.00451811	0.158072
Gene.93626::CIGENEomyV6.24150.1::g.93626::m.93626	1803.39	-0.350072	0.123266	-2.83997	0.00451183	0.158072
Gene.21713::CIGENEomyV6.4269.1::g.21713::m.21713	23.6457	-0.791685	0.278889	-2.83871	0.00452967	0.158256
Gene.217756::CIGENEomyV6.53327.1::g.217756::m.217756	216.157	0.589114	0.207568	2.83817	0.00453731	0.158256
Gene.310777::CIGENEomyV6.75341.2::g.310777::m.310777	1311.34	-0.375369	0.132247	-2.8384	0.00453399	0.158256
Gene.328993::CIGENEomyV6.80884.1::g.328993::m.328993	262.674	-0.755142	0.266217	-2.83656	0.00456019	0.158894
Gene.25704::CIGENEomyV6.3731.1::g.25704::m.25704	6.28912	-0.739103	0.26061	-2.83605	0.00456747	0.158987
Gene.367276::CIGENEomyV6.96452.1::g.367276::m.367276	34.1876	0.786096	0.277325	2.83457	0.00458875	0.159567
Gene.294472::CIGENEomyV6.71360.1::g.294472::m.294472	25.2431	-0.786835	0.27773	-2.83309	0.00461004	0.160145
Gene.151434::CIGENEomyV6.36853.1::g.151434::m.151434	170.42	0.598307	0.211301	2.83154	0.00463245	0.160762
Gene.147886::CIGENEomyV6.34270.1::g.147886::m.147886	1056.95	0.45212	0.159711	2.83087	0.00464221	0.160939
Gene.159619::CIGENEomyV6.39128.1::g.159619::m.159619	6.89854	-0.558438	0.197373	-2.82935	0.0046642	0.161303
Gene.335199::CIGENEomyV6.82229.5::g.335199::m.335199	455.58	-0.592948	0.209583	-2.82918	0.00466672	0.161303
Gene.346070::CIGENEomyV6.84657.1::g.346070::m.346070	53.3062	-0.792179	0.279967	-2.82954	0.00466143	0.161303
Gene.128314::CIGENEomyV6.31949.2::g.128314::m.128314	120.473	-0.695043	0.245699	-2.82884	0.00467167	0.161313
Gene.5599::CIGENEomyV6.2397.3::g.5599::m.5599	195.215	0.742545	0.262559	2.82811	0.00468243	0.161523
Gene.326608::CIGENEomyV6.80864.1::g.326608::m.326608	933.075	-0.405407	0.143378	-2.82755	0.00469062	0.161644
Gene.339816::CIGENEomyV6.82273.1::g.339816::m.339816	815.937	0.465442	0.164629	2.82722	0.00469537	0.161646
Gene.270081::CIGENEomyV6.65535.1::g.270081::m.270081	443.356	-0.453476	0.160435	-2.82654	0.00470541	0.161669
Gene.40401::CIGENEomyV6.9444.2::g.40401::m.40401	208.818	0.538118	0.190378	2.82658	0.0047048	0.161669
Gene.14060::CIGENEomyV6.3345.3::g.14060::m.14060	2186.42	0.579166	0.204938	2.82606	0.00471247	0.16171
Gene.152644::CIGENEomyV6.37359.1::g.152644::m.152644	7.92987	-0.628274	0.222351	-2.8256	0.00471925	0.16171
Gene.268847::CIGENEomyV6.64679.2::g.268847::m.268847	25.4078	0.660376	0.23372	2.8255	0.00472065	0.16171
Gene.106728::CIGENEomyV6.24894.1::g.106728::m.106728	280.013	0.672539	0.238156	2.82394	0.00474367	0.162231
Gene.339138::CIGENEomyV6.82867.1::g.339138::m.339138	474.282	-0.458712	0.162443	-2.82384	0.00474524	0.162231
Gene.4193::CIGENEomyV6.3137.1::g.4193::m.4193	315.161	-0.579886	0.205384	-2.82343	0.00475134	0.162279
Gene.115636::CIGENEomyV6.27728.1::g.115636::m.115636	1217.46	-0.515911	0.182791	-2.82241	0.00476639	0.162632
Gene.120208::CIGENEomyV6.26446.1::g.120208::m.120208	6.41018	0.766432	0.271671	2.82118	0.00478479	0.162777
Gene.158410::CIGENEomyV6.39032.1::g.158410::m.158410	28.9583	-0.775539	0.274875	-2.82142	0.00478109	0.162777
Gene.215903::CIGENEomyV6.53691.1::g.215903::m.215903	16.5427	0.780186	0.276528	2.82136	0.00478201	0.162777
Gene.295735::CIGENEomyV6.72222.1::g.295735::m.295735	28.9947	0.789517	0.279972	2.81999	0.00480257	0.163061
Gene.48870::CIGENEomyV6.12378.1::g.48870::m.48870	191.004	-0.594721	0.210891	-2.82003	0.00480185	0.163061
Gene.65434::CIGENEomyV6.18227.1::g.65434::m.65434	828.814	0.517442	0.183589	2.81848	0.00482522	0.163558
Gene.66336::CIGENEomyV6.18873.1::g.66336::m.66336	10.4429	-0.705597	0.250356	-2.81838	0.0048267	0.163558
Gene.259659::CIGENEomyV6.61619.1::g.259659::m.259659	138.301	0.464068	0.164706	2.81755	0.00483921	0.163821
Gene.112029::CIGENEomyV6.27851.2::g.112029::m.112029	154.786	0.5732	0.203585	2.81553	0.00486961	0.164387
Gene.16048::CIGENEomyV6.6158.1::g.16048::m.16048	6.19275	-0.629701	0.223618	-2.81596	0.00486314	0.164387
Gene.192015::CIGENEomyV6.44660.1::g.192015::m.192015	527.963	0.471298	0.167413	2.81518	0.00487495	0.164387
Gene.361052::CIGENEomyV6.91679.2::g.361052::m.361052	37.9724	-0.739005	0.262491	-2.81535	0.00487237	0.164387
Gene.217723::CIGENEomyV6.51509.1::g.217723::m.217723	35.356	-0.660493	0.234854	-2.81236	0.00491799	0.164393
Gene.269918::CIGENEomyV6.66537.2::g.269918::m.269918	15.2208	-0.762595	0.270982	-2.81419	0.00489005	0.164393
Gene.273157::CIGENEomyV6.65453.1::g.273157::m.273157	58.3598	0.725	0.257729	2.81303	0.00490766	0.164393
Gene.2868::CIGENEomyV6.457.1::g.2868::m.2868	724.093	-0.295166	0.104886	-2.81415	0.0048906	0.164393
Gene.315309::CIGENEomyV6.78404.2::g.315309::m.315309	830.063	0.408601	0.145245	2.81318	0.00490541	0.164393
Gene.55844::CIGENEomyV6.12120.1::g.55844::m.55844	506.236	-0.777473	0.276377	-2.81309	0.00490683	0.164393
Gene.62164::CIGENEomyV6.17431.1::g.62164::m.62164	49.2394	-0.605265	0.215131	-2.81347	0.00490095	0.164393
Gene.74900::CIGENEomyV6.17086.1::g.74900::m.74900	533.647	-0.426689	0.151712	-2.8125	0.00491573	0.164393
Gene.97127::CIGENEomyV6.26128.1::g.97127::m.97127	18.0556	0.783777	0.278643	2.81284	0.00491061	0.164393
Gene.106313::CIGENEomyV6.24337.2::g.106313::m.106313	79.1482	0.520313	0.185132	2.8105	0.00494644	0.164987
Gene.119073::CIGENEomyV6.27653.1::g.119073::m.119073	98.6298	0.720325	0.256324	2.81022	0.00495082	0.164987
Gene.233826::CIGENEomyV6.54247.2::g.233826::m.233826	16.0629	-0.779849	0.277472	-2.81055	0.00494575	0.164987
Gene.363165::CIGENEomyV6.93384.3::g.363165::m.363165	30.4469	-0.701864	0.249778	-2.80995	0.00495485	0.164987
Gene.106655::CIGENEomyV6.26323.1::g.106655::m.106655	92.0167	-0.651939	0.232054	-2.80943	0.00496287	0.165016
Gene.189062::CIGENEomyV6.44111.1::g.189062::m.189062	35.5922	0.758564	0.270021	2.80928	0.00496529	0.165016
Gene.121919::CIGENEomyV6.30024.2::g.121919::m.121919	357.575	-0.767959	0.273446	-2.80845	0.00497807	0.165173
Gene.243396::CIGENEomyV6.60577.2::g.243396::m.243396	9.53752	-0.773172	0.275312	-2.80835	0.0049796	0.165173
Gene.102812::CIGENEomyV6.22948.1::g.102812::m.102812	34.658	0.67386	0.240063	2.80702	0.00500026	0.165666
Gene.165508::CIGENEomyV6.41875.1::g.165508::m.165508	69.2134	-0.654782	0.233286	-2.80677	0.00500406	0.165666
Gene.121960::CIGENEomyV6.27654.1::g.121960::m.121960	1115.25	0.361518	0.128907	2.80449	0.00503967	0.166367
Gene.207836::CIGENEomyV6.48643.2::g.207836::m.207836	322.857	-0.592327	0.211174	-2.80492	0.00503296	0.166367
Gene.335093::CIGENEomyV6.82058.1::g.335093::m.335093	102.464	0.605019	0.215729	2.80454	0.00503886	0.166367
Gene.253942::CIGENEomyV6.62025.1::g.253942::m.253942	390.477	-0.576904	0.205803	-2.80319	0.00506	0.166879
Gene.160127::CIGENEomyV6.36937.1::g.160127::m.160127	507.305	-0.643691	0.229699	-2.80232	0.00507367	0.16717
Gene.172071::CIGENEomyV6.41402.1::g.172071::m.172071	1979.43	0.541315	0.193267	2.80087	0.00509645	0.167239
Gene.191656::CIGENEomyV6.46078.1::g.191656::m.191656	22.9542	-0.718864	0.256584	-2.80167	0.00508394	0.167239
Gene.21653::CIGENEomyV6.7216.1::g.21653::m.21653	4.27809	0.687879	0.245557	2.8013	0.00508974	0.167239
Gene.243585::CIGENEomyV6.60153.1::g.243585::m.243585	1068.78	-0.444305	0.158616	-2.80114	0.00509217	0.167239
Gene.76500::CIGENEomyV6.16782.1::g.76500::m.76500	1141.98	0.623182	0.222513	2.80065	0.0051	0.167239
Gene.141724::CIGENEomyV6.34593.1::g.141724::m.141724	828.235	-0.513331	0.183356	-2.79964	0.00511603	0.167328
Gene.234872::CIGENEomyV6.54609.1::g.234872::m.234872	168.674	-0.449594	0.160593	-2.79958	0.00511692	0.167328
Gene.246248::CIGENEomyV6.58501.1::g.246248::m.246248	58.1827	0.7639	0.272864	2.79956	0.00511726	0.167328
Gene.161753::CIGENEomyV6.38851.1::g.161753::m.161753	464.899	-0.353636	0.126338	-2.79913	0.00512412	0.167347
Gene.166870::CIGENEomyV6.40141.8::g.166870::m.166870	5933.1	-0.521084	0.186185	-2.79875	0.00513011	0.167347
Gene.270126::CIGENEomyV6.65436.2::g.270126::m.270126	74.5968	0.692106	0.247304	2.79861	0.00513237	0.167347
Gene.167601::CIGENEomyV6.42079.1::g.167601::m.167601	479.026	0.691678	0.247178	2.7983	0.00513731	0.16735
Gene.118243::CIGENEomyV6.28600.3::g.118243::m.118243	28.8732	0.695986	0.248899	2.79626	0.0051698	0.167826
Gene.196016::CIGENEomyV6.47092.2::g.196016::m.196016	26.4872	0.780081	0.278945	2.79654	0.00516537	0.167826
Gene.216299::CIGENEomyV6.51525.1::g.216299::m.216299	356.538	0.655093	0.234328	2.79563	0.0051799	0.167826
Gene.260067::CIGENEomyV6.62845.6::g.260067::m.260067	93.794	0.560286	0.200457	2.79505	0.00518919	0.167826
Gene.301029::CIGENEomyV6.73051.1::g.301029::m.301029	377.489	0.566499	0.202651	2.79544	0.00518298	0.167826
Gene.3164::CIGENEomyV6.3091.1::g.3164::m.3164	361.93	0.6129	0.219259	2.79532	0.00518483	0.167826
Gene.67961::CIGENEomyV6.18589.1::g.67961::m.67961	18.3095	-0.772987	0.276387	-2.79675	0.00516192	0.167826
Gene.8111::CIGENEomyV6.732.2::g.8111::m.8111	1646.68	-0.365842	0.130894	-2.79495	0.00519079	0.167826
Gene.113345::CIGENEomyV6.26789.1::g.113345::m.113345	90.0774	0.704599	0.252196	2.79385	0.00520838	0.167984
Gene.55408::CIGENEomyV6.14859.1::g.55408::m.55408	13.2774	0.781922	0.279849	2.79409	0.00520461	0.167984
Gene.97685::CIGENEomyV6.24602.1::g.97685::m.97685	537.381	0.429545	0.153753	2.79374	0.00521026	0.167984
Gene.155876::CIGENEomyV6.36485.2::g.155876::m.155876	774.134	-0.420265	0.150482	-2.79279	0.0052256	0.168075
Gene.32265::CIGENEomyV6.11521.1::g.32265::m.32265	10.8003	-0.780905	0.279573	-2.79321	0.00521876	0.168075
Gene.351516::CIGENEomyV6.87299.1::g.351516::m.351516	122.777	-0.698027	0.249951	-2.79266	0.00522771	0.168075
Gene.139120::CIGENEomyV6.35372.1::g.139120::m.139120	290.011	0.553633	0.198427	2.79011	0.00526895	0.168405
Gene.185191::CIGENEomyV6.45699.1::g.185191::m.185191	368.652	-0.570743	0.204572	-2.78994	0.00527176	0.168405
Gene.23286::CIGENEomyV6.5083.3::g.23286::m.23286	165.028	-0.559446	0.200408	-2.79153	0.00524589	0.168405
Gene.258768::CIGENEomyV6.61528.1::g.258768::m.258768	396.121	-0.497211	0.178175	-2.79058	0.00526133	0.168405
Gene.310530::CIGENEomyV6.75418.1::g.310530::m.310530	16.8175	-0.673203	0.241258	-2.79039	0.00526447	0.168405
Gene.318400::CIGENEomyV6.77299.1::g.318400::m.318400	2304.64	0.407856	0.146182	2.79006	0.00526976	0.168405
Gene.352372::CIGENEomyV6.87274.1::g.352372::m.352372	212.027	-0.494718	0.177362	-2.78932	0.00528186	0.168405
Gene.56233::CIGENEomyV6.14958.2::g.56233::m.56233	163.049	-0.539172	0.193271	-2.78972	0.00527543	0.168405
Gene.65139::CIGENEomyV6.16856.3::g.65139::m.65139	512.581	-0.414643	0.148652	-2.78935	0.00528142	0.168405
Gene.104359::CIGENEomyV6.23828.1::g.104359::m.104359	539.89	-0.622152	0.223081	-2.78891	0.00528862	0.168465
Gene.114471::CIGENEomyV6.27720.1::g.114471::m.114471	73.9959	0.77949	0.279813	2.78576	0.00534029	0.169067
Gene.141888::CIGENEomyV6.35966.1::g.141888::m.141888	3753.98	-0.625531	0.224739	-2.78337	0.00537981	0.169067
Gene.145578::CIGENEomyV6.34902.1::g.145578::m.145578	48.3977	0.706538	0.253804	2.7838	0.00537265	0.169067
Gene.147793::CIGENEomyV6.35467.1::g.147793::m.147793	112.062	-0.519525	0.186509	-2.78551	0.00534429	0.169067
Gene.192211::CIGENEomyV6.44767.1::g.192211::m.192211	98.059	0.576657	0.207166	2.78355	0.00537676	0.169067
Gene.22886::CIGENEomyV6.4848.1::g.22886::m.22886	397	0.511445	0.183633	2.78515	0.00535022	0.169067
Gene.248809::CIGENEomyV6.58274.1::g.248809::m.248809	1704.3	-0.549468	0.197202	-2.78632	0.00533103	0.169067
Gene.25638::CIGENEomyV6.4600.1::g.25638::m.25638	106.367	-0.574019	0.206165	-2.78427	0.00536479	0.169067
Gene.258650::CIGENEomyV6.62354.1::g.258650::m.258650	2260.09	-0.287815	0.103422	-2.78292	0.00538718	0.169067
Gene.263773::CIGENEomyV6.64852.1::g.263773::m.263773	140.761	-0.567618	0.20398	-2.78271	0.00539074	0.169067
Gene.289294::CIGENEomyV6.69887.2::g.289294::m.289294	2517.55	-0.364464	0.130972	-2.78277	0.00538963	0.169067
Gene.302206::CIGENEomyV6.74072.1::g.302206::m.302206	31.0991	-0.756439	0.271644	-2.78467	0.0053582	0.169067
Gene.315391::CIGENEomyV6.78560.2::g.315391::m.315391	879.933	0.494882	0.177667	2.78544	0.00534547	0.169067
Gene.363789::CIGENEomyV6.93891.1::g.363789::m.363789	100.415	-0.780117	0.279994	-2.78619	0.00533312	0.169067
Gene.371804::CIGENEomyV6.100003.18::g.371804::m.371804	44.1041	0.695297	0.249751	2.78397	0.00536986	0.169067
Gene.38715::CIGENEomyV6.11377.1::g.38715::m.38715	385.843	-0.393964	0.141498	-2.78423	0.00536546	0.169067
Gene.44052::CIGENEomyV6.8652.1::g.44052::m.44052	312.944	0.558922	0.200817	2.78323	0.00538199	0.169067
Gene.9277::CIGENEomyV6.1229.2::g.9277::m.9277	1961.15	0.655063	0.235498	2.78161	0.00540896	0.169484
Gene.154794::CIGENEomyV6.36378.1::g.154794::m.154794	4.99987	-0.716515	0.257663	-2.78082	0.0054221	0.169713
Gene.16254::CIGENEomyV6.4762.1::g.16254::m.16254	20.451	0.747363	0.268779	2.78059	0.00542609	0.169713
Gene.193221::CIGENEomyV6.45050.14::g.193221::m.193221	1630.04	-0.498369	0.1794	-2.77797	0.00546996	0.170675
Gene.223374::CIGENEomyV6.55898.1::g.223374::m.223374	419.521	-0.368896	0.132798	-2.77787	0.00547169	0.170675
Gene.46192::CIGENEomyV6.7909.1::g.46192::m.46192	9.64382	-0.77255	0.278073	-2.77823	0.00546566	0.170675
Gene.291510::CIGENEomyV6.72456.1::g.291510::m.291510	282.01	-0.547078	0.197066	-2.77611	0.00550135	0.171446
Gene.241799::CIGENEomyV6.58016.1::g.241799::m.241799	1598.94	0.314969	0.113482	2.7755	0.00551172	0.171478
Gene.301646::CIGENEomyV6.73185.1::g.301646::m.301646	2362.52	0.39971	0.144016	2.77546	0.00551233	0.171478
Gene.141317::CIGENEomyV6.34643.1::g.141317::m.141317	17.8792	0.744323	0.268376	2.77343	0.00554688	0.171672
Gene.241631::CIGENEomyV6.58793.2::g.241631::m.241631	326.854	0.743909	0.268275	2.77293	0.00555539	0.171672
Gene.245470::CIGENEomyV6.60424.5::g.245470::m.245470	46.8376	0.708953	0.255545	2.77428	0.00553236	0.171672
Gene.272115::CIGENEomyV6.63993.1::g.272115::m.272115	24.7324	0.773796	0.279127	2.7722	0.00556781	0.171672
Gene.28918::CIGENEomyV6.6814.1::g.28918::m.28918	691.377	0.51189	0.184544	2.77381	0.00554048	0.171672
Gene.307867::CIGENEomyV6.75101.1::g.307867::m.307867	135.428	0.449925	0.162237	2.77326	0.00554971	0.171672
Gene.324374::CIGENEomyV6.79740.1::g.324374::m.324374	105.317	-0.587868	0.211942	-2.77372	0.00554199	0.171672
Gene.352688::CIGENEomyV6.86140.1::g.352688::m.352688	13.2374	-0.776267	0.27993	-2.77308	0.00555287	0.171672
Gene.57613::CIGENEomyV6.14817.1::g.57613::m.57613	55.0798	0.630279	0.227347	2.77232	0.00556584	0.171672
Gene.93884::CIGENEomyV6.26076.2::g.93884::m.93884	18.9801	0.749929	0.27052	2.77218	0.00556827	0.171672
Gene.99651::CIGENEomyV6.24520.1::g.99651::m.99651	2615.53	-0.38326	0.138269	-2.77184	0.00557405	0.171697
Gene.233504::CIGENEomyV6.54501.6::g.233504::m.233504	359.427	-0.402958	0.145447	-2.77048	0.00559736	0.172261
Gene.231001::CIGENEomyV6.55906.2::g.231001::m.231001	389.315	-0.387884	0.140077	-2.76907	0.00562159	0.172604
Gene.348854::CIGENEomyV6.85917.1::g.348854::m.348854	21.3783	0.721842	0.26069	2.76896	0.00562349	0.172604
Gene.8606::CIGENEomyV6.651.1::g.8606::m.8606	200.576	-0.463544	0.167394	-2.76919	0.00561965	0.172604
Gene.116396::CIGENEomyV6.30038.10::g.116396::m.116396	38.3959	-0.65231	0.235698	-2.76756	0.00564769	0.172874
Gene.134748::CIGENEomyV6.31466.1::g.134748::m.134748	1666.09	-0.454434	0.164224	-2.76717	0.0056546	0.172874
Gene.173613::CIGENEomyV6.42216.1::g.173613::m.173613	70.1615	-0.774717	0.279997	-2.76687	0.00565967	0.172874
Gene.187860::CIGENEomyV6.44240.1::g.187860::m.187860	168.703	0.610368	0.220611	2.76672	0.00566233	0.172874
Gene.207791::CIGENEomyV6.49632.1::g.207791::m.207791	337.209	0.507465	0.183367	2.76749	0.00564906	0.172874
Gene.339698::CIGENEomyV6.83090.1::g.339698::m.339698	51.0416	0.608263	0.219755	2.76791	0.00564164	0.172874
Gene.160336::CIGENEomyV6.38150.1::g.160336::m.160336	57.2358	0.594108	0.214984	2.7635	0.00571859	0.173823
Gene.239547::CIGENEomyV6.59913.1::g.239547::m.239547	78.355	-0.595916	0.215562	-2.76447	0.00570146	0.173823
Gene.375181::CIGENEomyV6.102504.1::g.375181::m.375181	140.685	-0.617206	0.223331	-2.76364	0.00571607	0.173823
Gene.761::CIGENEomyV6.3492.3::g.761::m.761	18.7023	0.770034	0.27858	2.76414	0.00570735	0.173823
Gene.97623::CIGENEomyV6.24369.1::g.97623::m.97623	194.301	-0.773215	0.279781	-2.76364	0.00571606	0.173823
Gene.8206::CIGENEomyV6.2889.1::g.8206::m.8206	39.73	0.605551	0.219196	2.7626	0.0057343	0.173994
Gene.93102::CIGENEomyV6.21166.1::g.93102::m.93102	1224.59	-0.394642	0.142843	-2.76277	0.00573123	0.173994
Gene.310612::CIGENEomyV6.74485.1::g.310612::m.310612	795.407	-0.430874	0.156017	-2.76172	0.00574985	0.174313
Gene.117154::CIGENEomyV6.29044.2::g.117154::m.117154	873.444	0.607104	0.219869	2.7612	0.0057589	0.174434
Gene.271247::CIGENEomyV6.64849.1::g.271247::m.271247	373.553	0.416556	0.150911	2.76027	0.00577538	0.174598
Gene.303300::CIGENEomyV6.72806.1::g.303300::m.303300	52.0718	0.650133	0.235552	2.76004	0.00577949	0.174598
Gene.58541::CIGENEomyV6.12262.1::g.58541::m.58541	65.2587	0.590104	0.213794	2.76015	0.00577744	0.174598
Gene.113644::CIGENEomyV6.27440.2::g.113644::m.113644	125.573	-0.443349	0.160903	-2.75538	0.00586233	0.174958
Gene.117869::CIGENEomyV6.27306.1::g.117869::m.117869	29.7561	-0.762458	0.276549	-2.75705	0.00583257	0.174958
Gene.145329::CIGENEomyV6.34136.1::g.145329::m.145329	23.6601	-0.689266	0.250053	-2.75649	0.00584263	0.174958
Gene.245638::CIGENEomyV6.59100.1::g.245638::m.245638	106.792	0.649747	0.23573	2.75632	0.00584556	0.174958
Gene.319587::CIGENEomyV6.79766.1::g.319587::m.319587	22.9036	0.730239	0.265015	2.75547	0.00586085	0.174958
Gene.333460::CIGENEomyV6.82131.2::g.333460::m.333460	57.6723	-0.7711	0.279831	-2.75559	0.00585867	0.174958
Gene.333672::CIGENEomyV6.82785.1::g.333672::m.333672	656.701	0.485387	0.176005	2.7578	0.0058192	0.174958
Gene.335412::CIGENEomyV6.82550.1::g.335412::m.335412	2424.85	-0.387542	0.140527	-2.75777	0.00581977	0.174958
Gene.342802::CIGENEomyV6.84380.4::g.342802::m.342802	104.086	-0.595552	0.216012	-2.75703	0.00583283	0.174958
Gene.360::CIGENEomyV6.1735.1::g.360::m.360	273.676	-0.456022	0.165339	-2.75811	0.00581363	0.174958
Gene.36663::CIGENEomyV6.10161.1::g.36663::m.36663	342.955	-0.43196	0.15663	-2.75784	0.00581841	0.174958
Gene.36814::CIGENEomyV6.8179.1::g.36814::m.36814	12.9325	-0.723458	0.262304	-2.75809	0.00581399	0.174958
Gene.45669::CIGENEomyV6.8774.1::g.45669::m.45669	384.614	0.410696	0.149029	2.75581	0.00585472	0.174958
Gene.51092::CIGENEomyV6.13943.1::g.51092::m.51092	25.4568	-0.768921	0.278846	-2.75752	0.00582422	0.174958
Gene.141375::CIGENEomyV6.35619.1::g.141375::m.141375	35.737	0.697156	0.253183	2.75357	0.00589498	0.175604
Gene.28009::CIGENEomyV6.5403.1::g.28009::m.28009	1058.06	-0.335348	0.121781	-2.75369	0.00589281	0.175604
Gene.373980::CIGENEomyV6.101586.1::g.373980::m.373980	15.5457	0.759113	0.275707	2.75333	0.00589924	0.175604
Gene.362111::CIGENEomyV6.92494.1::g.362111::m.362111	14.8219	0.770067	0.279725	2.75295	0.00590613	0.175658
Gene.32612::CIGENEomyV6.8107.1::g.32612::m.32612	21.2139	-0.721379	0.262097	-2.75233	0.00591724	0.175837
Gene.176709::CIGENEomyV6.41704.1::g.176709::m.176709	723.795	0.317338	0.115347	2.75116	0.00593855	0.176318
Gene.272740::CIGENEomyV6.64561.1::g.272740::m.272740	551.945	-0.537171	0.195295	-2.75057	0.00594923	0.176472
Gene.57797::CIGENEomyV6.14334.3::g.57797::m.57797	964.302	-0.584679	0.212587	-2.75031	0.00595396	0.176472
Gene.157182::CIGENEomyV6.37198.1::g.157182::m.157182	7.62199	-0.618263	0.224836	-2.74984	0.00596251	0.176515
Gene.332636::CIGENEomyV6.82226.1::g.332636::m.332636	23.1627	-0.739828	0.269061	-2.74966	0.00596562	0.176515
Gene.9245::CIGENEomyV6.1025.1::g.9245::m.9245	79.0777	-0.675959	0.245862	-2.74934	0.00597148	0.176537
Gene.118587::CIGENEomyV6.28017.1::g.118587::m.118587	5529.77	-0.55412	0.201647	-2.74797	0.00599649	0.176767
Gene.156387::CIGENEomyV6.37829.1::g.156387::m.156387	154.571	-0.431925	0.157183	-2.74792	0.00599754	0.176767
Gene.207174::CIGENEomyV6.50416.1::g.207174::m.207174	13079.9	-0.374828	0.13641	-2.7478	0.00599974	0.176767
Gene.368906::CIGENEomyV6.97736.1::g.368906::m.368906	4.71983	-0.696042	0.253254	-2.74839	0.0059888	0.176767
Gene.106815::CIGENEomyV6.25765.2::g.106815::m.106815	67.742	0.757306	0.275777	2.74608	0.00603121	0.17709
Gene.226252::CIGENEomyV6.54443.34::g.226252::m.226252	769.982	0.73433	0.267347	2.74673	0.00601932	0.17709
Gene.301355::CIGENEomyV6.73478.1::g.301355::m.301355	586.615	0.515808	0.187806	2.7465	0.00602358	0.17709
Gene.36736::CIGENEomyV6.9610.2::g.36736::m.36736	1307.09	-0.433631	0.157899	-2.74625	0.00602801	0.17709
Gene.99677::CIGENEomyV6.25066.2::g.99677::m.99677	26.7655	0.768518	0.279914	2.74555	0.00604096	0.177225
Gene.207426::CIGENEomyV6.49902.2::g.207426::m.207426	1018.56	-0.372485	0.135707	-2.74477	0.00605534	0.177446
Gene.239777::CIGENEomyV6.60875.4::g.239777::m.239777	54.5283	-0.612553	0.223186	-2.74458	0.00605876	0.177446
Gene.185182::CIGENEomyV6.46447.1::g.185182::m.185182	1282.11	-0.331571	0.120875	-2.74309	0.00608639	0.177653
Gene.26239::CIGENEomyV6.3932.1::g.26239::m.26239	49.4345	0.688758	0.251056	2.74344	0.00607987	0.177653
Gene.322249::CIGENEomyV6.77840.1::g.322249::m.322249	789.008	-0.464839	0.169424	-2.74364	0.00607627	0.177653
Gene.32633::CIGENEomyV6.8721.2::g.32633::m.32633	144.595	0.629615	0.229527	2.74309	0.00608634	0.177653
Gene.171542::CIGENEomyV6.43195.2::g.171542::m.171542	438.011	0.420229	0.153294	2.74132	0.0061193	0.177712
Gene.215001::CIGENEomyV6.53194.1::g.215001::m.215001	89.0936	-0.761258	0.277632	-2.74196	0.00610734	0.177712
Gene.286712::CIGENEomyV6.69418.1::g.286712::m.286712	441.323	-0.436997	0.159352	-2.74234	0.00610031	0.177712
Gene.376091::CIGENEomyV6.103361.1::g.376091::m.376091	76.4341	0.679327	0.247699	2.74255	0.00609644	0.177712
Gene.52807::CIGENEomyV6.12569.1::g.52807::m.52807	1722.45	-0.502437	0.183283	-2.74132	0.0061192	0.177712
Gene.77883::CIGENEomyV6.16968.2::g.77883::m.77883	1093.54	-0.423558	0.154486	-2.74172	0.00611178	0.177712
Gene.90475::CIGENEomyV6.20618.1::g.90475::m.90475	63.6508	0.646717	0.236026	2.74002	0.00614358	0.178267
Gene.236437::CIGENEomyV6.59407.1::g.236437::m.236437	221.39	-0.385592	0.140779	-2.73899	0.00616287	0.178527
Gene.239443::CIGENEomyV6.59929.1::g.239443::m.239443	206.157	-0.577005	0.210644	-2.73924	0.00615811	0.178527
Gene.330316::CIGENEomyV6.80658.2::g.330316::m.330316	35.6701	0.7204	0.263047	2.73867	0.00616877	0.178548
Gene.176292::CIGENEomyV6.40747.5::g.176292::m.176292	443.9	-0.423283	0.154667	-2.73674	0.0062051	0.179449
Gene.245317::CIGENEomyV6.57550.1::g.245317::m.245317	88.4404	-0.751253	0.274658	-2.73523	0.00623369	0.179674
Gene.254685::CIGENEomyV6.63226.1::g.254685::m.254685	1206.32	-0.238287	0.087117	-2.73525	0.00623323	0.179674
Gene.358::CIGENEomyV6.579.1::g.358::m.358	1030.27	-0.474351	0.173415	-2.73534	0.00623151	0.179674
Gene.375535::CIGENEomyV6.102847.1::g.375535::m.375535	9.05907	-0.765263	0.279745	-2.73558	0.00622709	0.179674
Gene.123804::CIGENEomyV6.32400.1::g.123804::m.123804	159.322	0.514096	0.188033	2.73407	0.00625571	0.180158
Gene.249691::CIGENEomyV6.59716.1::g.249691::m.249691	179.126	0.581689	0.212777	2.73379	0.00626096	0.180159
Gene.203660::CIGENEomyV6.50293.2::g.203660::m.203660	91.3723	0.662695	0.24256	2.73208	0.00629351	0.180644
Gene.324589::CIGENEomyV6.79571.1::g.324589::m.324589	149.52	0.606009	0.2218	2.73223	0.00629071	0.180644
Gene.49095::CIGENEomyV6.13306.5::g.49095::m.49095	682.748	-0.641903	0.234921	-2.73242	0.00628718	0.180644
Gene.231417::CIGENEomyV6.56778.2::g.231417::m.231417	177.376	0.669613	0.245146	2.73148	0.00630499	0.180673
Gene.280071::CIGENEomyV6.66730.2::g.280071::m.280071	430.44	-0.481823	0.176389	-2.73158	0.00630305	0.180673
Gene.194164::CIGENEomyV6.45808.1::g.194164::m.194164	813.713	0.407972	0.149559	2.72784	0.00637511	0.180725
Gene.269196::CIGENEomyV6.66418.6::g.269196::m.269196	31.2271	-0.756114	0.277121	-2.72846	0.00636303	0.180725
Gene.274980::CIGENEomyV6.66880.2::g.274980::m.274980	33.8995	0.656063	0.240553	2.72731	0.00638529	0.180725
Gene.29165::CIGENEomyV6.5842.1::g.29165::m.29165	24.1757	-0.752715	0.275969	-2.72754	0.00638092	0.180725
Gene.305993::CIGENEomyV6.75219.1::g.305993::m.305993	580.34	0.441814	0.161921	2.72858	0.00636082	0.180725
Gene.315557::CIGENEomyV6.78705.1::g.315557::m.315557	216.648	-0.503487	0.184377	-2.73075	0.00631898	0.180725
Gene.322695::CIGENEomyV6.78997.8::g.322695::m.322695	18.139	0.7259	0.266013	2.72882	0.00635616	0.180725
Gene.354307::CIGENEomyV6.87008.1::g.354307::m.354307	545.842	0.690115	0.252688	2.7311	0.00631239	0.180725
Gene.357217::CIGENEomyV6.88344.3::g.357217::m.357217	153.356	0.764175	0.279984	2.72936	0.00634582	0.180725
Gene.368218::CIGENEomyV6.97234.1::g.368218::m.368218	21.3224	0.757618	0.277757	2.72763	0.00637914	0.180725
Gene.37525::CIGENEomyV6.7823.1::g.37525::m.37525	4.25137	-0.638476	0.233985	-2.72871	0.00635826	0.180725
Gene.51065::CIGENEomyV6.13140.3::g.51065::m.51065	700.379	-0.359405	0.13172	-2.72855	0.00636139	0.180725
Gene.5566::CIGENEomyV6.482.1::g.5566::m.5566	327.875	-0.578081	0.211795	-2.72944	0.00634415	0.180725
Gene.64507::CIGENEomyV6.16219.1::g.64507::m.64507	115.563	0.559871	0.205066	2.7302	0.00632964	0.180725
Gene.86788::CIGENEomyV6.20569.1::g.86788::m.86788	725.452	-0.526608	0.193011	-2.72839	0.0063645	0.180725
Gene.164090::CIGENEomyV6.42697.1::g.164090::m.164090	40.0793	0.761907	0.279476	2.7262	0.00640685	0.180969
Gene.176191::CIGENEomyV6.40030.1::g.176191::m.176191	55.7698	0.673673	0.247137	2.72591	0.00641244	0.180969
Gene.271848::CIGENEomyV6.66148.5::g.271848::m.271848	137.704	0.546289	0.200402	2.72597	0.00641121	0.180969
Gene.70285::CIGENEomyV6.16753.2::g.70285::m.70285	1512.78	0.250675	0.0919645	2.72579	0.00641487	0.180969
Gene.187755::CIGENEomyV6.43689.1::g.187755::m.187755	86.4223	-0.638456	0.23426	-2.72542	0.00642205	0.181023
Gene.316289::CIGENEomyV6.77344.1::g.316289::m.316289	51.4295	-0.63262	0.232429	-2.72178	0.00649314	0.182878
Gene.224902::CIGENEomyV6.55782.1::g.224902::m.224902	1622.37	-0.531355	0.195319	-2.72045	0.00651924	0.183286
Gene.244775::CIGENEomyV6.60575.1::g.244775::m.244775	363.907	0.330687	0.121563	2.72029	0.00652257	0.183286
Gene.74017::CIGENEomyV6.16778.1::g.74017::m.74017	9.58049	0.760721	0.279653	2.72024	0.00652354	0.183286
Gene.1627::CIGENEomyV6.1831.1::g.1627::m.1627	264.828	-0.659389	0.242433	-2.71989	0.00653044	0.18333
Gene.239081::CIGENEomyV6.59266.1::g.239081::m.239081	224.26	-0.567132	0.208627	-2.7184	0.00655984	0.183808
Gene.288246::CIGENEomyV6.69636.1::g.288246::m.288246	182.474	0.696755	0.256353	2.71796	0.00656864	0.183808
Gene.366759::CIGENEomyV6.96131.4::g.366759::m.366759	13.4131	-0.746053	0.274545	-2.71742	0.0065794	0.183808
Gene.373436::CIGENEomyV6.101089.1::g.373436::m.373436	214.008	-0.516743	0.190134	-2.71778	0.00657213	0.183808
Gene.40337::CIGENEomyV6.11399.1::g.40337::m.40337	53.9413	-0.666077	0.245006	-2.71862	0.00655555	0.183808
Gene.98403::CIGENEomyV6.24839.1::g.98403::m.98403	344.177	0.693169	0.255078	2.71748	0.00657813	0.183808
Gene.112869::CIGENEomyV6.28626.4::g.112869::m.112869	225.063	0.521085	0.191926	2.71503	0.00662693	0.184986
Gene.169488::CIGENEomyV6.41991.1::g.169488::m.169488	2805	-0.522106	0.192403	-2.71362	0.00665533	0.185601
Gene.177003::CIGENEomyV6.42713.7::g.177003::m.177003	403.965	0.660999	0.243652	2.71289	0.00667002	0.185601
Gene.206945::CIGENEomyV6.49312.1::g.206945::m.206945	11.8507	-0.759415	0.279931	-2.71286	0.00667047	0.185601
Gene.60377::CIGENEomyV6.14686.2::g.60377::m.60377	46.127	-0.677153	0.249568	-2.7133	0.00666177	0.185601
Gene.290803::CIGENEomyV6.72340.1::g.290803::m.290803	18.673	0.73413	0.270697	2.712	0.00668788	0.185936
Gene.99401::CIGENEomyV6.24355.1::g.99401::m.99401	301.938	0.592764	0.218595	2.7117	0.00669388	0.185953
Gene.132777::CIGENEomyV6.32685.1::g.132777::m.132777	29.3427	0.646492	0.23857	2.70986	0.00673107	0.186536
Gene.333616::CIGENEomyV6.83394.2::g.333616::m.333616	424.713	0.660274	0.243626	2.7102	0.00672431	0.186536
Gene.86545::CIGENEomyV6.19726.1::g.86545::m.86545	812.527	-0.399758	0.147512	-2.71001	0.0067281	0.186536
Gene.30619::CIGENEomyV6.10660.1::g.30619::m.30619	4.84818	-0.558159	0.206005	-2.70944	0.00673972	0.186626
Gene.119252::CIGENEomyV6.26949.1::g.119252::m.119252	358.778	-0.567492	0.209487	-2.70896	0.00674946	0.186746
Gene.203807::CIGENEomyV6.49914.1::g.203807::m.203807	2454.64	-0.404791	0.149462	-2.70832	0.00676251	0.186807
Gene.224473::CIGENEomyV6.55720.1::g.224473::m.224473	352.092	0.507712	0.18746	2.70837	0.00676146	0.186807
Gene.192165::CIGENEomyV6.44957.1::g.192165::m.192165	165.352	-0.594225	0.219435	-2.70798	0.00676949	0.186851
Gene.65009::CIGENEomyV6.17391.1::g.65009::m.65009	137.82	-0.660871	0.244097	-2.70741	0.00678097	0.187018
Gene.116470::CIGENEomyV6.28404.1::g.116470::m.116470	438.127	-0.420451	0.155332	-2.70679	0.00679382	0.187223
Gene.68579::CIGENEomyV6.18213.1::g.68579::m.68579	68.587	0.602947	0.222802	2.70621	0.0068057	0.187401
Gene.101475::CIGENEomyV6.23739.2::g.101475::m.101475	66.6661	0.716699	0.264989	2.70464	0.00683788	0.187426
Gene.143784::CIGENEomyV6.33965.3::g.143784::m.143784	1926.1	-0.449967	0.166398	-2.70417	0.00684755	0.187426
Gene.193373::CIGENEomyV6.44351.6::g.193373::m.193373	45.6961	0.75745	0.279991	2.70527	0.00682491	0.187426
Gene.196137::CIGENEomyV6.46445.1::g.196137::m.196137	4990.74	-0.576796	0.213271	-2.70453	0.0068402	0.187426
Gene.19768::CIGENEomyV6.5479.1::g.19768::m.19768	62.3704	-0.561984	0.207783	-2.70466	0.00683737	0.187426
Gene.270730::CIGENEomyV6.64205.4::g.270730::m.270730	219.501	0.689836	0.255137	2.70379	0.00685544	0.187426
Gene.338955::CIGENEomyV6.81768.1::g.338955::m.338955	60.7722	0.660682	0.244197	2.70553	0.00681963	0.187426
Gene.35883::CIGENEomyV6.10364.32::g.35883::m.35883	13.6333	0.7562	0.279669	2.70392	0.00685278	0.187426
Gene.80236::CIGENEomyV6.21321.1::g.80236::m.80236	22.3394	-0.725003	0.267953	-2.70571	0.00681582	0.187426
Gene.52005::CIGENEomyV6.14116.1::g.52005::m.52005	54.1326	0.722068	0.267088	2.70348	0.00686181	0.187451
Gene.301407::CIGENEomyV6.73942.1::g.301407::m.301407	95.6802	0.718897	0.26604	2.70222	0.00688788	0.188015
Gene.183448::CIGENEomyV6.46322.2::g.183448::m.183448	867.528	0.693719	0.256791	2.7015	0.00690283	0.188264
Gene.97632::CIGENEomyV6.25153.1::g.97632::m.97632	157.414	0.448495	0.166032	2.70125	0.00690791	0.188264
Gene.344345::CIGENEomyV6.85132.3::g.344345::m.344345	53.5776	-0.752227	0.278628	-2.69975	0.00693913	0.188817
Gene.34990::CIGENEomyV6.10674.1::g.34990::m.34990	28.8835	0.748965	0.277402	2.69992	0.00693553	0.188817
Gene.126551::CIGENEomyV6.31619.1::g.126551::m.126551	7025.88	0.620334	0.229977	2.69738	0.00698876	0.18886
Gene.1881::CIGENEomyV6.722.1::g.1881::m.1881	183.248	0.561274	0.208101	2.69712	0.00699428	0.18886
Gene.18830::CIGENEomyV6.4625.1::g.18830::m.18830	56.5962	-0.73873	0.273928	-2.6968	0.00700088	0.18886
Gene.235702::CIGENEomyV6.55553.1::g.235702::m.235702	107.294	-0.612199	0.226824	-2.69901	0.00695461	0.18886
Gene.25514::CIGENEomyV6.6793.3::g.25514::m.25514	3028.83	0.38568	0.142905	2.69885	0.00695798	0.18886
Gene.280627::CIGENEomyV6.67004.1::g.280627::m.280627	323.742	0.443487	0.164367	2.69815	0.00697266	0.18886
Gene.290196::CIGENEomyV6.68864.1::g.290196::m.290196	124.215	-0.480467	0.178059	-2.69835	0.00696831	0.18886
Gene.312376::CIGENEomyV6.76304.2::g.312376::m.312376	57.7354	0.683532	0.253372	2.69774	0.00698113	0.18886
Gene.362190::CIGENEomyV6.92581.1::g.362190::m.362190	369.636	-0.575863	0.213449	-2.69789	0.00697807	0.18886
Gene.39404::CIGENEomyV6.8814.1::g.39404::m.39404	248.478	0.679813	0.2519	2.69874	0.00696029	0.18886
Gene.91288::CIGENEomyV6.21203.1::g.91288::m.91288	1832.88	-0.42206	0.156498	-2.6969	0.00699879	0.18886
Gene.277809::CIGENEomyV6.67456.1::g.277809::m.277809	67.6259	0.719428	0.266825	2.69625	0.00701245	0.189024
Gene.126257::CIGENEomyV6.30378.1::g.126257::m.126257	262.265	-0.455161	0.168865	-2.69541	0.00703013	0.189215
Gene.327462::CIGENEomyV6.81059.1::g.327462::m.327462	1481.04	-0.38923	0.144406	-2.6954	0.00703048	0.189215
Gene.188613::CIGENEomyV6.44540.17::g.188613::m.188613	13.1905	0.752232	0.27915	2.69472	0.00704474	0.189239
Gene.194218::CIGENEomyV6.45741.1::g.194218::m.194218	1478.01	-0.610916	0.226718	-2.69461	0.00704711	0.189239
Gene.233084::CIGENEomyV6.54534.2::g.233084::m.233084	155.073	0.71017	0.263555	2.69458	0.00704782	0.189239
Gene.315236::CIGENEomyV6.78376.1::g.315236::m.315236	3386.25	-0.42793	0.158828	-2.6943	0.00705367	0.189249
Gene.193192::CIGENEomyV6.44716.1::g.193192::m.193192	2396.59	-0.561929	0.208629	-2.69344	0.00707189	0.189296
Gene.277834::CIGENEomyV6.67707.1::g.277834::m.277834	869.356	0.622062	0.230924	2.6938	0.00706435	0.189296
Gene.369072::CIGENEomyV6.97835.1::g.369072::m.369072	214.707	-0.627847	0.233098	-2.69349	0.00707086	0.189296
Gene.373349::CIGENEomyV6.101021.1::g.373349::m.373349	120.108	-0.661426	0.245599	-2.69311	0.00707885	0.189336
Gene.111200::CIGENEomyV6.27847.1::g.111200::m.111200	392.329	-0.378619	0.140655	-2.69184	0.00710592	0.189475
Gene.173627::CIGENEomyV6.41048.1::g.173627::m.173627	457.161	0.573127	0.212954	2.69132	0.00711699	0.189475
Gene.209873::CIGENEomyV6.49344.1::g.209873::m.209873	99.4119	0.640599	0.238009	2.69149	0.00711334	0.189475
Gene.2804::CIGENEomyV6.2802.1::g.2804::m.2804	25.0364	-0.638141	0.237031	-2.69223	0.00709762	0.189475
Gene.302170::CIGENEomyV6.72940.1::g.302170::m.302170	169.961	0.749645	0.278421	2.69249	0.00709212	0.189475
Gene.70202::CIGENEomyV6.16827.1::g.70202::m.70202	997.67	-0.68726	0.255333	-2.69163	0.00711044	0.189475
Gene.185007::CIGENEomyV6.45340.1::g.185007::m.185007	5.91787	0.721326	0.268104	2.69047	0.00713517	0.189759
Gene.290059::CIGENEomyV6.68632.1::g.290059::m.290059	131.928	0.71869	0.267141	2.69031	0.00713861	0.189759
Gene.296738::CIGENEomyV6.71028.1::g.296738::m.296738	169.522	0.471364	0.175269	2.68937	0.00715871	0.190146
Gene.285499::CIGENEomyV6.70313.3::g.285499::m.285499	4.57207	-0.53911	0.200561	-2.68801	0.00718787	0.190774
Gene.180190::CIGENEomyV6.43297.1::g.180190::m.180190	24.5759	0.692253	0.257618	2.68714	0.00720676	0.191129
Gene.153692::CIGENEomyV6.36752.1::g.153692::m.153692	600.52	0.573139	0.213341	2.6865	0.00722056	0.191348
Gene.346045::CIGENEomyV6.85156.1::g.346045::m.346045	323.314	-0.497583	0.185237	-2.6862	0.00722694	0.19137
Gene.154164::CIGENEomyV6.38646.1::g.154164::m.154164	159.394	-0.547877	0.204087	-2.68453	0.00726314	0.191579
Gene.205276::CIGENEomyV6.50470.1::g.205276::m.205276	739.623	-0.351506	0.13101	-2.68306	0.00729525	0.191579
Gene.207395::CIGENEomyV6.49107.2::g.207395::m.207395	79.1756	0.725511	0.270432	2.68279	0.00730114	0.191579
Gene.210973::CIGENEomyV6.53288.1::g.210973::m.210973	651.16	0.343737	0.128094	2.68346	0.00728637	0.191579
Gene.21784::CIGENEomyV6.6602.4::g.21784::m.21784	1516.92	-0.504917	0.188207	-2.68277	0.00730143	0.191579
Gene.232408::CIGENEomyV6.56812.1::g.232408::m.232408	163.765	0.488252	0.181926	2.6838	0.00727914	0.191579
Gene.289223::CIGENEomyV6.69536.1::g.289223::m.289223	823.942	0.464411	0.172949	2.68526	0.00724743	0.191579
Gene.299627::CIGENEomyV6.73482.1::g.299627::m.299627	3437.45	-0.486717	0.181387	-2.68331	0.00728969	0.191579
Gene.359064::CIGENEomyV6.89978.1::g.359064::m.359064	71.847	0.724819	0.269941	2.6851	0.0072508	0.191579
Gene.70462::CIGENEomyV6.16898.1::g.70462::m.70462	49.1331	-0.745947	0.277867	-2.68454	0.00726288	0.191579
Gene.86989::CIGENEomyV6.20652.2::g.86989::m.86989	3107.41	0.504809	0.188085	2.68394	0.00727591	0.191579
Gene.98697::CIGENEomyV6.25651.1::g.98697::m.98697	43.724	0.696909	0.259719	2.68332	0.00728953	0.191579
Gene.166068::CIGENEomyV6.40669.1::g.166068::m.166068	1090.58	0.279384	0.104162	2.6822	0.00731387	0.191585
Gene.179504::CIGENEomyV6.42074.2::g.179504::m.179504	103.818	0.667444	0.248891	2.68167	0.00732559	0.191585
Gene.18447::CIGENEomyV6.5416.8::g.18447::m.18447	5685.17	-0.425652	0.158737	-2.68148	0.00732971	0.191585
Gene.242779::CIGENEomyV6.57897.1::g.242779::m.242779	35.3697	-0.737535	0.274976	-2.68218	0.00731437	0.191585
Gene.310681::CIGENEomyV6.74851.2::g.310681::m.310681	670.062	0.495903	0.184953	2.68124	0.00733495	0.191585
Gene.374327::CIGENEomyV6.101893.1::g.374327::m.374327	39.9108	-0.743802	0.277332	-2.68199	0.00731858	0.191585
Gene.127810::CIGENEomyV6.31443.1::g.127810::m.127810	131.137	0.5357	0.199852	2.68049	0.0073515	0.191732
Gene.191915::CIGENEomyV6.44970.2::g.191915::m.191915	22.6046	-0.732307	0.273372	-2.67879	0.00738888	0.191732
Gene.211041::CIGENEomyV6.52959.1::g.211041::m.211041	1835.79	0.478664	0.178709	2.67846	0.00739608	0.191732
Gene.235389::CIGENEomyV6.56137.1::g.235389::m.235389	25.7801	-0.75033	0.279951	-2.68022	0.00735741	0.191732
Gene.249027::CIGENEomyV6.57882.3::g.249027::m.249027	424.244	-0.529578	0.197621	-2.67977	0.00736737	0.191732
Gene.249832::CIGENEomyV6.58354.2::g.249832::m.249832	182.87	0.550606	0.205477	2.67964	0.00737009	0.191732
Gene.316335::CIGENEomyV6.78441.2::g.316335::m.316335	143.984	-0.737175	0.275124	-2.67943	0.00737481	0.191732
Gene.36540::CIGENEomyV6.9031.1::g.36540::m.36540	15.2386	-0.739803	0.276133	-2.67916	0.00738082	0.191732
Gene.79369::CIGENEomyV6.22246.2::g.79369::m.79369	20.181	-0.746544	0.278631	-2.67933	0.00737691	0.191732
Gene.99147::CIGENEomyV6.23146.1::g.99147::m.99147	376.789	-0.418797	0.156345	-2.67867	0.00739162	0.191732
Gene.125117::CIGENEomyV6.32622.1::g.125117::m.125117	26.2133	0.719539	0.268859	2.67627	0.00744466	0.192757
Gene.168142::CIGENEomyV6.42304.2::g.168142::m.168142	24.9789	-0.490101	0.183135	-2.67617	0.00744681	0.192757
Gene.18880::CIGENEomyV6.6212.1::g.18880::m.18880	609.299	0.320899	0.119931	2.67569	0.0074576	0.192892
Gene.12996::CIGENEomyV6.2091.1::g.12996::m.12996	504.887	0.464226	0.173618	2.67384	0.00749887	0.192903
Gene.14645::CIGENEomyV6.6624.1::g.14645::m.14645	611.303	0.564603	0.211077	2.67486	0.00747599	0.192903
Gene.223871::CIGENEomyV6.54496.1::g.223871::m.223871	29.1349	0.723238	0.27043	2.6744	0.00748632	0.192903
Gene.236284::CIGENEomyV6.59040.3::g.236284::m.236284	84.2043	-0.700661	0.26206	-2.67367	0.00750271	0.192903
Gene.242588::CIGENEomyV6.59198.1::g.242588::m.242588	24.8589	-0.735723	0.275166	-2.67374	0.007501	0.192903
Gene.246637::CIGENEomyV6.57672.1::g.246637::m.246637	35.2185	-0.725314	0.271198	-2.67449	0.00748438	0.192903
Gene.272046::CIGENEomyV6.65002.1::g.272046::m.272046	64.1353	0.686628	0.256702	2.6748	0.00747737	0.192903
Gene.321695::CIGENEomyV6.79588.1::g.321695::m.321695	69.7055	-0.73788	0.275878	-2.67466	0.00748051	0.192903
Gene.228908::CIGENEomyV6.54535.1::g.228908::m.228908	379.114	0.56566	0.211592	2.67335	0.00750971	0.192939
Gene.106621::CIGENEomyV6.24392.1::g.106621::m.106621	3345.18	-0.276829	0.103666	-2.67038	0.0075765	0.19315
Gene.10987::CIGENEomyV6.2503.1::g.10987::m.10987	39.8622	-0.679978	0.254472	-2.67211	0.00753759	0.19315
Gene.14267::CIGENEomyV6.4695.1::g.14267::m.14267	235.12	0.635469	0.237919	2.67095	0.00756375	0.19315
Gene.153187::CIGENEomyV6.37972.1::g.153187::m.153187	16.8053	0.737723	0.276204	2.67094	0.00756399	0.19315
Gene.173771::CIGENEomyV6.41484.5::g.173771::m.173771	760.381	-0.485498	0.181851	-2.66976	0.00759062	0.19315
Gene.208524::CIGENEomyV6.50848.1::g.208524::m.208524	105.555	-0.604981	0.226523	-2.67073	0.00756871	0.19315
Gene.270271::CIGENEomyV6.63826.2::g.270271::m.270271	19.282	0.743969	0.278553	2.67083	0.00756637	0.19315
Gene.274739::CIGENEomyV6.67392.2::g.274739::m.274739	535.056	0.392711	0.146947	2.67247	0.00752942	0.19315
Gene.338265::CIGENEomyV6.82274.1::g.338265::m.338265	231.491	-0.585101	0.218964	-2.67214	0.00753702	0.19315
Gene.338311::CIGENEomyV6.82088.1::g.338311::m.338311	263.902	-0.560212	0.209808	-2.67011	0.0075826	0.19315
Gene.369239::CIGENEomyV6.97983.1::g.369239::m.369239	17.8278	0.693394	0.259643	2.67057	0.00757232	0.19315
Gene.373974::CIGENEomyV6.101582.1::g.373974::m.373974	12.9606	0.669635	0.250805	2.66995	0.00758633	0.19315
Gene.84669::CIGENEomyV6.20956.1::g.84669::m.84669	8.24572	0.74544	0.279033	2.67151	0.007551	0.19315
Gene.192343::CIGENEomyV6.44165.1::g.192343::m.192343	64.3916	-0.602308	0.225686	-2.66879	0.00761254	0.19328
Gene.84485::CIGENEomyV6.20276.1::g.84485::m.84485	261.989	0.367496	0.137696	2.66888	0.0076104	0.19328
Gene.94534::CIGENEomyV6.25758.1::g.94534::m.94534	102.147	0.648068	0.242793	2.66923	0.00760263	0.19328
Gene.308236::CIGENEomyV6.75461.1::g.308236::m.308236	280.044	-0.636543	0.238549	-2.66839	0.00762155	0.193367
Gene.308303::CIGENEomyV6.75612.1::g.308303::m.308303	62.7084	0.649913	0.243666	2.66723	0.00764794	0.193894
Gene.10654::CIGENEomyV6.2957.1::g.10654::m.10654	700.863	0.321955	0.120733	2.66667	0.00766079	0.19398
Gene.202771::CIGENEomyV6.49849.3::g.202771::m.202771	149.089	0.555099	0.208168	2.66659	0.00766259	0.19398
Gene.122979::CIGENEomyV6.29277.1::g.122979::m.122979	1281.95	-0.311041	0.116669	-2.66601	0.00767575	0.193982
Gene.320530::CIGENEomyV6.78398.1::g.320530::m.320530	180.311	0.54861	0.205792	2.66585	0.00767951	0.193982
Gene.87359::CIGENEomyV6.20170.1::g.87359::m.87359	109.005	-0.632677	0.237322	-2.6659	0.00767832	0.193982
Gene.191971::CIGENEomyV6.46805.1::g.191971::m.191971	399.9	-0.614716	0.23066	-2.66503	0.00769816	0.194169
Gene.316132::CIGENEomyV6.79557.2::g.316132::m.316132	334.638	0.523015	0.196242	2.66515	0.00769539	0.194169
Gene.262202::CIGENEomyV6.62234.4::g.262202::m.262202	1977.08	0.629507	0.236309	2.66391	0.00772373	0.194672
Gene.161219::CIGENEomyV6.37606.1::g.161219::m.161219	42.3485	0.716046	0.268871	2.66316	0.00774107	0.194967
Gene.123808::CIGENEomyV6.31861.1::g.123808::m.123808	601.918	0.470363	0.176716	2.66169	0.00777491	0.195079
Gene.150231::CIGENEomyV6.34271.1::g.150231::m.150231	445.282	0.389048	0.146269	2.65981	0.00781856	0.195079
Gene.220306::CIGENEomyV6.52857.1::g.220306::m.220306	287.272	-0.358783	0.134819	-2.66122	0.0077859	0.195079
Gene.251108::CIGENEomyV6.62454.1::g.251108::m.251108	13.1991	-0.734361	0.275997	-2.66075	0.00779658	0.195079
Gene.267030::CIGENEomyV6.65909.1::g.267030::m.267030	150.829	0.451717	0.169711	2.66168	0.0077752	0.195079
Gene.28231::CIGENEomyV6.7211.1::g.28231::m.28231	41.2959	0.731362	0.27497	2.65979	0.00781898	0.195079
Gene.331912::CIGENEomyV6.80843.1::g.331912::m.331912	2421.26	-0.443882	0.166763	-2.66175	0.0077735	0.195079
Gene.361296::CIGENEomyV6.91885.2::g.361296::m.361296	3061.17	-0.735246	0.276331	-2.66074	0.00779689	0.195079
Gene.377841::CIGENEomyV6.104489.1::g.377841::m.377841	44.2059	0.674452	0.253324	2.66241	0.00775841	0.195079
Gene.44880::CIGENEomyV6.10089.1::g.44880::m.44880	537.028	0.677553	0.254686	2.66035	0.00780603	0.195079
Gene.65866::CIGENEomyV6.16687.1::g.65866::m.65866	52.9546	-0.732063	0.275208	-2.66004	0.00781315	0.195079
Gene.91837::CIGENEomyV6.20304.1::g.91837::m.91837	26.4633	0.66063	0.248185	2.66185	0.00777132	0.195079
Gene.96500::CIGENEomyV6.26203.1::g.96500::m.96500	47.9149	-0.705862	0.265287	-2.66074	0.0077968	0.195079
Gene.154994::CIGENEomyV6.37324.1::g.154994::m.154994	559.316	-0.699168	0.262924	-2.6592	0.00783275	0.195153
Gene.73394::CIGENEomyV6.18220.5::g.73394::m.73394	343.267	-0.525833	0.197743	-2.65917	0.00783326	0.195153
Gene.25632::CIGENEomyV6.3943.2::g.25632::m.25632	10.4314	-0.63017	0.237042	-2.65847	0.00784953	0.195418
Gene.274821::CIGENEomyV6.67146.1::g.274821::m.274821	50.7887	0.676691	0.254575	2.65812	0.00785781	0.195483
Gene.232646::CIGENEomyV6.55847.1::g.232646::m.232646	27.9593	-0.694205	0.26119	-2.65785	0.00786398	0.195487
Gene.293767::CIGENEomyV6.71318.1::g.293767::m.293767	177.211	0.717794	0.270088	2.65763	0.00786929	0.195487
Gene.122903::CIGENEomyV6.29066.1::g.122903::m.122903	29.9223	-0.725501	0.273043	-2.65709	0.00788182	0.195504
Gene.14922::CIGENEomyV6.6568.1::g.14922::m.14922	120.337	0.580125	0.218352	2.65684	0.00788773	0.195504
Gene.22066::CIGENEomyV6.3656.1::g.22066::m.22066	242.38	-0.516401	0.194341	-2.65719	0.00787948	0.195504
Gene.363276::CIGENEomyV6.93492.2::g.363276::m.363276	75.2019	-0.694667	0.261508	-2.65639	0.00789829	0.195504
Gene.365365::CIGENEomyV6.95238.1::g.365365::m.365365	14.5877	-0.734925	0.276647	-2.65654	0.00789463	0.195504
Gene.120516::CIGENEomyV6.27337.1::g.120516::m.120516	64.6007	-0.58189	0.219239	-2.65414	0.00795105	0.195602
Gene.149529::CIGENEomyV6.34253.1::g.149529::m.149529	49.5384	0.609494	0.229613	2.65444	0.00794409	0.195602
Gene.236659::CIGENEomyV6.58170.2::g.236659::m.236659	479.818	-0.448786	0.169077	-2.65433	0.00794656	0.195602
Gene.268612::CIGENEomyV6.65561.1::g.268612::m.268612	27.3374	0.73747	0.277817	2.65452	0.00794216	0.195602
Gene.27002::CIGENEomyV6.5395.2::g.27002::m.27002	317.944	-0.453622	0.170906	-2.65422	0.00794913	0.195602
Gene.327459::CIGENEomyV6.81283.2::g.327459::m.327459	4.15962	0.622647	0.234603	2.65405	0.00795325	0.195602
Gene.46672::CIGENEomyV6.9351.1::g.46672::m.46672	584.981	-0.424611	0.159962	-2.65444	0.00794396	0.195602
Gene.4712::CIGENEomyV6.469.1::g.4712::m.4712	1352.06	-0.534063	0.20116	-2.65492	0.00793267	0.195602
Gene.55130::CIGENEomyV6.13348.3::g.55130::m.55130	2010.87	-0.565366	0.212978	-2.65458	0.00794083	0.195602
Gene.129838::CIGENEomyV6.32534.1::g.129838::m.129838	113.45	0.737826	0.278101	2.65308	0.00797604	0.196023
Gene.375341::CIGENEomyV6.102614.1::g.375341::m.375341	111.315	-0.44326	0.167231	-2.65059	0.00803503	0.197192
Gene.62217::CIGENEomyV6.16173.12::g.62217::m.62217	136.61	0.443279	0.167235	2.65063	0.00803423	0.197192
Gene.284382::CIGENEomyV6.69304.1::g.284382::m.284382	83.0065	0.645426	0.243593	2.64961	0.00805858	0.19763
Gene.228999::CIGENEomyV6.57016.2::g.228999::m.228999	1304.13	-0.720444	0.272061	-2.64809	0.00809468	0.197991
Gene.232237::CIGENEomyV6.55522.1::g.232237::m.232237	756.228	0.541299	0.204397	2.64827	0.00809045	0.197991
Gene.49252::CIGENEomyV6.12220.2::g.49252::m.49252	178.671	-0.661828	0.249932	-2.64803	0.00809624	0.197991
Gene.96127::CIGENEomyV6.26357.3::g.96127::m.96127	14.0268	0.731747	0.276299	2.64839	0.00808773	0.197991
Gene.100139::CIGENEomyV6.25560.4::g.100139::m.100139	42.4861	0.63969	0.241611	2.6476	0.00810645	0.1981
Gene.312344::CIGENEomyV6.74615.1::g.312344::m.312344	1047.45	-0.55351	0.209083	-2.64732	0.00811318	0.198124
Gene.28489::CIGENEomyV6.6388.1::g.28489::m.28489	2152.93	-0.483139	0.182535	-2.64683	0.00812498	0.198273
Gene.166731::CIGENEomyV6.42282.1::g.166731::m.166731	510.378	0.548082	0.207108	2.64636	0.00813621	0.198406
Gene.153562::CIGENEomyV6.36702.1::g.153562::m.153562	1174.08	-0.322327	0.121827	-2.64577	0.00815052	0.198475
Gene.279176::CIGENEomyV6.67479.1::g.279176::m.279176	26.7192	-0.740125	0.279719	-2.64595	0.00814609	0.198475
Gene.10199::CIGENEomyV6.1806.1::g.10199::m.10199	300.835	0.628293	0.237536	2.64504	0.00816802	0.198481
Gene.288417::CIGENEomyV6.70412.2::g.288417::m.288417	445.252	-0.543278	0.205369	-2.64538	0.00816002	0.198481
Gene.341212::CIGENEomyV6.84795.1::g.341212::m.341212	857.612	-0.330751	0.125037	-2.64522	0.00816367	0.198481
Gene.334673::CIGENEomyV6.83446.1::g.334673::m.334673	42.4352	0.733203	0.277272	2.64434	0.00818492	0.198752
Gene.226353::CIGENEomyV6.55704.4::g.226353::m.226353	1185.29	0.423116	0.160048	2.64369	0.00820082	0.198789
Gene.232760::CIGENEomyV6.55600.1::g.232760::m.232760	2896.01	-0.491487	0.185951	-2.64309	0.00821523	0.198789
Gene.256583::CIGENEomyV6.61498.1::g.256583::m.256583	41.3856	-0.740077	0.279994	-2.64319	0.00821287	0.198789
Gene.80765::CIGENEomyV6.20437.1::g.80765::m.80765	9.51568	-0.730065	0.276209	-2.64316	0.00821364	0.198789
Gene.88706::CIGENEomyV6.20048.1::g.88706::m.88706	638.716	0.487235	0.184279	2.64401	0.00819307	0.198789
Gene.196737::CIGENEomyV6.44939.1::g.196737::m.196737	383.827	-0.485643	0.183768	-2.6427	0.00822479	0.198881
Gene.119679::CIGENEomyV6.28673.5::g.119679::m.119679	7.46003	-0.66161	0.250448	-2.6417	0.008249	0.199327
Gene.21202::CIGENEomyV6.4570.1::g.21202::m.21202	1048.44	-0.430634	0.163031	-2.64143	0.0082558	0.199352
Gene.100176::CIGENEomyV6.23829.4::g.100176::m.100176	123.652	-0.700883	0.265487	-2.63999	0.00829079	0.199499
Gene.107895::CIGENEomyV6.23506.5::g.107895::m.107895	424.401	-0.396086	0.150032	-2.64002	0.00829023	0.199499
Gene.171739::CIGENEomyV6.42989.1::g.171739::m.171739	192.362	0.467156	0.176949	2.64007	0.00828894	0.199499
Gene.190468::CIGENEomyV6.46497.1::g.190468::m.190468	9.87708	-0.738688	0.279735	-2.64067	0.00827413	0.199499
Gene.269010::CIGENEomyV6.64965.1::g.269010::m.269010	45.0115	0.691472	0.261889	2.64032	0.00828275	0.199499
Gene.113913::CIGENEomyV6.27540.1::g.113913::m.113913	241.301	0.468685	0.177649	2.63827	0.00833304	0.199542
Gene.126879::CIGENEomyV6.33328.1::g.126879::m.126879	46.5198	0.665823	0.252241	2.63964	0.00829953	0.199542
Gene.16284::CIGENEomyV6.4382.1::g.16284::m.16284	3006.47	-0.691041	0.261928	-2.63829	0.00833254	0.199542
Gene.196192::CIGENEomyV6.46727.1::g.196192::m.196192	170.704	0.687361	0.260443	2.63919	0.00831036	0.199542
Gene.270512::CIGENEomyV6.65685.2::g.270512::m.270512	227.269	0.607287	0.230132	2.63887	0.00831828	0.199542
Gene.292081::CIGENEomyV6.71877.1::g.292081::m.292081	17.598	0.732285	0.277537	2.63852	0.00832693	0.199542
Gene.315230::CIGENEomyV6.77734.4::g.315230::m.315230	207.445	0.506258	0.191847	2.63887	0.00831824	0.199542
Gene.43698::CIGENEomyV6.7863.1::g.43698::m.43698	20.8425	-0.715564	0.271274	-2.63779	0.00834482	0.199686
Gene.192848::CIGENEomyV6.46551.3::g.192848::m.192848	110.234	0.702897	0.2666	2.63652	0.00837609	0.200295
Gene.58353::CIGENEomyV6.15188.1::g.58353::m.58353	10.8689	-0.735484	0.279017	-2.63598	0.00838939	0.200336
Gene.94229::CIGENEomyV6.25294.2::g.94229::m.94229	52.2833	0.560782	0.212723	2.63621	0.00838378	0.200336
Gene.226920::CIGENEomyV6.54923.1::g.226920::m.226920	296.92	-0.735531	0.279078	-2.63558	0.00839937	0.200436
Gene.124167::CIGENEomyV6.32978.2::g.124167::m.124167	28.8341	0.678267	0.25741	2.63497	0.00841445	0.200657
Gene.68300::CIGENEomyV6.17711.1::g.68300::m.68300	120.989	0.726201	0.275657	2.63443	0.00842776	0.200835
Gene.18740::CIGENEomyV6.5071.6::g.18740::m.18740	687.429	-0.355876	0.135216	-2.6319	0.0084909	0.202077
Gene.280502::CIGENEomyV6.67084.3::g.280502::m.280502	317.222	-0.583114	0.221578	-2.63164	0.00849744	0.202077
Gene.52643::CIGENEomyV6.14142.1::g.52643::m.52643	1044.89	0.514199	0.19539	2.63166	0.00849696	0.202077
Gene.147795::CIGENEomyV6.34233.1::g.147795::m.147795	1957.69	-0.438094	0.166488	-2.63139	0.00850363	0.202086
Gene.16252::CIGENEomyV6.5468.1::g.16252::m.16252	640.638	0.434294	0.165068	2.631	0.00851328	0.202176
Gene.155010::CIGENEomyV6.38722.1::g.155010::m.155010	280.475	-0.646066	0.24559	-2.63067	0.00852161	0.202234
Gene.166599::CIGENEomyV6.40422.1::g.166599::m.166599	15.4139	0.702291	0.267079	2.62953	0.00855032	0.202374
Gene.170116::CIGENEomyV6.40647.1::g.170116::m.170116	154.365	0.48716	0.185221	2.63016	0.00853455	0.202374
Gene.183610::CIGENEomyV6.43832.1::g.183610::m.183610	398.39	-0.720785	0.274085	-2.62979	0.0085438	0.202374
Gene.192216::CIGENEomyV6.45123.1::g.192216::m.192216	163.447	0.44162	0.167948	2.6295	0.00855093	0.202374
Gene.274362::CIGENEomyV6.65817.1::g.274362::m.274362	1035.27	0.390659	0.148599	2.62895	0.00856492	0.202428
Gene.279238::CIGENEomyV6.67007.1::g.279238::m.279238	443.294	-0.545368	0.207432	-2.62914	0.00856015	0.202428
Gene.281185::CIGENEomyV6.67236.1::g.281185::m.281185	285.299	0.485462	0.184719	2.62812	0.00858587	0.202784
Gene.207091::CIGENEomyV6.50036.4::g.207091::m.207091	140.885	0.563706	0.214549	2.6274	0.00860395	0.202923
Gene.337070::CIGENEomyV6.82192.1::g.337070::m.337070	523.166	-0.465159	0.177026	-2.62763	0.00859826	0.202923
Gene.92434::CIGENEomyV6.21145.1::g.92434::m.92434	135.421	-0.662842	0.252301	-2.62719	0.00860941	0.202923
Gene.299424::CIGENEomyV6.73536.1::g.299424::m.299424	4511.31	-0.408773	0.155649	-2.62624	0.00863343	0.203351
Gene.185169::CIGENEomyV6.44743.1::g.185169::m.185169	188.023	0.573463	0.218414	2.62557	0.00865035	0.20361
Gene.257542::CIGENEomyV6.63801.2::g.257542::m.257542	648.624	-0.663956	0.252991	-2.62442	0.00867964	0.204161
Gene.13114::CIGENEomyV6.2777.1::g.13114::m.13114	372.898	-0.572845	0.21831	-2.624	0.00869031	0.204183
Gene.155539::CIGENEomyV6.38572.1::g.155539::m.155539	32.672	-0.670292	0.255544	-2.62301	0.00871575	0.204183
Gene.30923::CIGENEomyV6.9003.1::g.30923::m.30923	11.6411	-0.69694	0.265678	-2.62325	0.00870955	0.204183
Gene.317334::CIGENEomyV6.77099.8::g.317334::m.317334	957.558	0.502002	0.191326	2.6238	0.00869546	0.204183
Gene.351109::CIGENEomyV6.87630.1::g.351109::m.351109	8.5663	0.724647	0.276223	2.62341	0.00870534	0.204183
Gene.82667::CIGENEomyV6.20433.3::g.82667::m.82667	588.502	-0.360992	0.137626	-2.62299	0.00871607	0.204183
Gene.199956::CIGENEomyV6.48275.1::g.199956::m.199956	13.3499	0.733883	0.279887	2.62207	0.00873984	0.204309
Gene.234914::CIGENEomyV6.56788.4::g.234914::m.234914	1117.97	-0.274406	0.104679	-2.6214	0.00875696	0.204309
Gene.309399::CIGENEomyV6.74987.9::g.309399::m.309399	23.5006	-0.730338	0.278515	-2.62226	0.008735	0.204309
Gene.377209::CIGENEomyV6.104087.1::g.377209::m.377209	169	0.591734	0.225637	2.6225	0.00872863	0.204309
Gene.55532::CIGENEomyV6.13098.3::g.55532::m.55532	15.9021	0.733029	0.279619	2.62153	0.00875354	0.204309
Gene.87618::CIGENEomyV6.20840.1::g.87618::m.87618	1401.82	-0.352898	0.134603	-2.62177	0.0087474	0.204309
Gene.48089::CIGENEomyV6.12878.1::g.48089::m.48089	584.224	0.345557	0.131834	2.62116	0.008763	0.204312
Gene.225729::CIGENEomyV6.54191.2::g.225729::m.225729	119.634	-0.552712	0.210932	-2.62034	0.00878433	0.204627
Gene.52311::CIGENEomyV6.12624.1::g.52311::m.52311	1381.71	-0.621339	0.237136	-2.62018	0.00878836	0.204627
Gene.10062::CIGENEomyV6.1046.1::g.10062::m.10062	28.9382	-0.694496	0.265301	-2.61776	0.00885082	0.204704
Gene.153787::CIGENEomyV6.36600.1::g.153787::m.153787	143.624	-0.701142	0.267776	-2.61839	0.00883453	0.204704
Gene.157971::CIGENEomyV6.37824.1::g.157971::m.157971	135.566	0.601047	0.229461	2.61939	0.00880882	0.204704
Gene.161092::CIGENEomyV6.37699.1::g.161092::m.161092	10.7951	0.729101	0.278358	2.61929	0.00881126	0.204704
Gene.199410::CIGENEomyV6.49097.1::g.199410::m.199410	30.793	-0.731407	0.279333	-2.6184	0.00883426	0.204704
Gene.295508::CIGENEomyV6.72077.7::g.295508::m.295508	223.241	0.529925	0.20242	2.61794	0.00884615	0.204704
Gene.341516::CIGENEomyV6.84680.1::g.341516::m.341516	911.663	-0.481932	0.184096	-2.61783	0.0088491	0.204704
Gene.44499::CIGENEomyV6.8076.4::g.44499::m.44499	290.989	0.509813	0.194752	2.61776	0.00885093	0.204704
Gene.76940::CIGENEomyV6.18622.10::g.76940::m.76940	201.062	-0.554997	0.211998	-2.61794	0.00884622	0.204704
Gene.8132::CIGENEomyV6.658.1::g.8132::m.8132	167.542	0.580794	0.221807	2.61847	0.00883254	0.204704
Gene.180874::CIGENEomyV6.46976.1::g.180874::m.180874	43.1414	-0.674238	0.257642	-2.61695	0.00887181	0.204912
Gene.4539::CIGENEomyV6.1616.1::g.4539::m.4539	11.826	0.722981	0.276253	2.6171	0.00886796	0.204912
Gene.122391::CIGENEomyV6.27207.1::g.122391::m.122391	7.85931	-0.564389	0.215707	-2.61646	0.00888458	0.205043
Gene.254088::CIGENEomyV6.62314.2::g.254088::m.254088	12.1594	-0.728744	0.278542	-2.61628	0.00888934	0.205043
Gene.45116::CIGENEomyV6.11169.2::g.45116::m.45116	211.176	0.62797	0.240121	2.61523	0.00891675	0.205538
Gene.339534::CIGENEomyV6.82168.2::g.339534::m.339534	81.7097	-0.693377	0.265196	-2.61458	0.00893374	0.205655
Gene.61539::CIGENEomyV6.17751.1::g.61539::m.61539	65.4842	0.676641	0.258792	2.61461	0.00893289	0.205655
Gene.192473::CIGENEomyV6.46752.1::g.192473::m.192473	80.0188	0.72155	0.276019	2.61413	0.0089455	0.205699
Gene.363710::CIGENEomyV6.93808.1::g.363710::m.363710	24.6634	-0.731726	0.27992	-2.61405	0.00894757	0.205699
Gene.176407::CIGENEomyV6.40475.1::g.176407::m.176407	97.5025	-0.576694	0.220692	-2.61311	0.00897214	0.205989
Gene.37463::CIGENEomyV6.8907.8::g.37463::m.37463	322.853	0.467368	0.178851	2.61316	0.00897086	0.205989
Gene.114328::CIGENEomyV6.28427.3::g.114328::m.114328	856.65	0.573888	0.219675	2.61244	0.00898991	0.20626
Gene.312414::CIGENEomyV6.76075.1::g.312414::m.312414	4.47898	0.680338	0.260457	2.61209	0.00899913	0.206335
Gene.130489::CIGENEomyV6.31115.2::g.130489::m.130489	786.695	-0.535684	0.205119	-2.61158	0.00901245	0.206366
Gene.69988::CIGENEomyV6.18265.5::g.69988::m.69988	24.1458	0.726203	0.278069	2.61159	0.00901219	0.206366
Gene.116699::CIGENEomyV6.28022.1::g.116699::m.116699	751.777	0.476515	0.182502	2.61101	0.00902758	0.206575
Gene.135824::CIGENEomyV6.31937.1::g.135824::m.135824	3573.52	-0.436055	0.167021	-2.61077	0.00903382	0.206581
Gene.361088::CIGENEomyV6.91692.1::g.361088::m.361088	147.918	0.496728	0.190315	2.61004	0.0090532	0.206887
Gene.135963::CIGENEomyV6.30755.1::g.135963::m.135963	335.437	0.504747	0.193474	2.60887	0.00908422	0.207322
Gene.83170::CIGENEomyV6.21871.4::g.83170::m.83170	318.035	0.558579	0.214098	2.60899	0.00908086	0.207322
Gene.211664::CIGENEomyV6.51609.1::g.211664::m.211664	121.414	0.617361	0.236737	2.60779	0.00911287	0.207749
Gene.248112::CIGENEomyV6.59018.4::g.248112::m.248112	150.817	0.600095	0.230183	2.60704	0.00913293	0.207749
Gene.253808::CIGENEomyV6.60906.1::g.253808::m.253808	13.9406	0.718334	0.275504	2.60734	0.00912485	0.207749
Gene.305305::CIGENEomyV6.72834.1::g.305305::m.305305	623.272	0.404225	0.155051	2.60704	0.00913297	0.207749
Gene.333609::CIGENEomyV6.82053.1::g.333609::m.333609	28.0273	-0.610872	0.234317	-2.60704	0.00913299	0.207749
Gene.164418::CIGENEomyV6.43509.2::g.164418::m.164418	25.4846	0.624348	0.239554	2.6063	0.00915269	0.20806
Gene.71501::CIGENEomyV6.16900.1::g.71501::m.71501	3242.68	-0.554682	0.212872	-2.60571	0.0091685	0.208282
Gene.247003::CIGENEomyV6.58468.1::g.247003::m.247003	1871.22	-0.428726	0.164565	-2.6052	0.00918202	0.208452
Gene.163298::CIGENEomyV6.40881.1::g.163298::m.163298	591.223	-0.295036	0.113271	-2.6047	0.00919545	0.208483
Gene.353281::CIGENEomyV6.86356.3::g.353281::m.353281	105.406	0.635074	0.243798	2.60491	0.00918971	0.208483
Gene.347239::CIGENEomyV6.85010.1::g.347239::m.347239	1683.47	0.367177	0.141001	2.60407	0.00921245	0.20871
Gene.90920::CIGENEomyV6.21538.2::g.90920::m.90920	11.955	-0.712854	0.273766	-2.60388	0.00921758	0.20871
Gene.66641::CIGENEomyV6.17455.1::g.66641::m.66641	9104.01	-0.529066	0.203254	-2.60297	0.00924194	0.209125
Gene.112645::CIGENEomyV6.28177.1::g.112645::m.112645	1031.75	0.60946	0.234161	2.60274	0.00924821	0.209129
Gene.59738::CIGENEomyV6.13135.1::g.59738::m.59738	5.57946	-0.712468	0.273798	-2.60216	0.00926374	0.209343
Gene.283783::CIGENEomyV6.69141.6::g.283783::m.283783	90.4429	0.627997	0.241435	2.6011	0.00929258	0.209721
Gene.97332::CIGENEomyV6.24475.1::g.97332::m.97332	1205.71	-0.412065	0.158419	-2.60111	0.00929222	0.209721
Gene.281071::CIGENEomyV6.66992.2::g.281071::m.281071	139.951	0.574565	0.220937	2.60059	0.00930648	0.209897
Gene.10945::CIGENEomyV6.1772.1::g.10945::m.10945	420.812	0.515512	0.198307	2.59957	0.00933415	0.210384
Gene.328157::CIGENEomyV6.80808.1::g.328157::m.328157	6.39961	-0.6812	0.262187	-2.59814	0.00937294	0.21112
Gene.167842::CIGENEomyV6.41129.1::g.167842::m.167842	321.097	-0.520396	0.200334	-2.59764	0.00938666	0.211292
Gene.108021::CIGENEomyV6.28456.1::g.108021::m.108021	96.2849	0.641122	0.246831	2.59741	0.00939298	0.211296
Gene.180094::CIGENEomyV6.42905.2::g.180094::m.180094	590.814	0.482614	0.185829	2.59709	0.00940159	0.211352
Gene.63077::CIGENEomyV6.18277.1::g.63077::m.63077	92.7219	0.598422	0.230449	2.59676	0.00941063	0.211418
Gene.103190::CIGENEomyV6.24826.1::g.103190::m.103190	49.4122	-0.715724	0.275711	-2.59593	0.00943362	0.211796
Gene.241161::CIGENEomyV6.59924.2::g.241161::m.241161	430.451	0.618028	0.238192	2.59466	0.00946841	0.212439
Gene.119170::CIGENEomyV6.28266.1::g.119170::m.119170	132.568	-0.55082	0.212342	-2.59402	0.00948603	0.212697
Gene.309160::CIGENEomyV6.74772.1::g.309160::m.309160	24.7548	0.722165	0.278637	2.59178	0.00954806	0.213533
Gene.320075::CIGENEomyV6.79188.1::g.320075::m.320075	55.2148	0.645115	0.248888	2.59198	0.00954241	0.213533
Gene.334299::CIGENEomyV6.81845.2::g.334299::m.334299	262.798	-0.675772	0.260731	-2.59184	0.00954636	0.213533
Gene.356465::CIGENEomyV6.87785.1::g.356465::m.356465	291.996	-0.60767	0.234448	-2.59192	0.00954428	0.213533
Gene.189730::CIGENEomyV6.44319.2::g.189730::m.189730	13.5844	0.721296	0.278336	2.59146	0.00955695	0.213593
Gene.118385::CIGENEomyV6.30032.1::g.118385::m.118385	16.8674	0.714957	0.276046	2.58999	0.00959792	0.213933
Gene.147864::CIGENEomyV6.35309.1::g.147864::m.147864	428.816	-0.383791	0.148201	-2.58966	0.00960696	0.213933
Gene.165969::CIGENEomyV6.41640.1::g.165969::m.165969	3015.95	0.382731	0.147768	2.59008	0.00959529	0.213933
Gene.246001::CIGENEomyV6.59974.1::g.246001::m.246001	78.3547	0.539253	0.208234	2.58964	0.0096075	0.213933
Gene.246133::CIGENEomyV6.59723.1::g.246133::m.246133	71.5525	0.719299	0.277767	2.58958	0.00960932	0.213933
Gene.46519::CIGENEomyV6.10946.1::g.46519::m.46519	279.192	0.544074	0.210057	2.59012	0.00959418	0.213933
Gene.108846::CIGENEomyV6.29300.1::g.108846::m.108846	471.461	0.309464	0.119575	2.58803	0.00965261	0.214119
Gene.125587::CIGENEomyV6.32658.2::g.125587::m.125587	512.916	-0.59464	0.229764	-2.58805	0.00965217	0.214119
Gene.238045::CIGENEomyV6.58933.1::g.238045::m.238045	739.85	0.329039	0.127107	2.58867	0.00963483	0.214119
Gene.305261::CIGENEomyV6.73683.2::g.305261::m.305261	87.2176	0.542017	0.209439	2.58795	0.00965488	0.214119
Gene.319886::CIGENEomyV6.79051.1::g.319886::m.319886	22.8185	0.712502	0.275248	2.58859	0.00963711	0.214119
Gene.321097::CIGENEomyV6.77973.1::g.321097::m.321097	302.853	-0.567131	0.21908	-2.5887	0.00963397	0.214119
Gene.101840::CIGENEomyV6.24900.1::g.101840::m.101840	24.0837	0.723042	0.279584	2.58613	0.00970597	0.214381
Gene.102674::CIGENEomyV6.25585.2::g.102674::m.102674	3121.59	-0.627817	0.242898	-2.5847	0.00974648	0.214381
Gene.115232::CIGENEomyV6.27816.2::g.115232::m.115232	1413.61	-0.500967	0.193697	-2.58634	0.00970024	0.214381
Gene.163372::CIGENEomyV6.42735.2::g.163372::m.163372	1981.47	-0.515592	0.199484	-2.58462	0.00974853	0.214381
Gene.169828::CIGENEomyV6.41515.2::g.169828::m.169828	624.626	0.496713	0.192118	2.58546	0.00972504	0.214381
Gene.185098::CIGENEomyV6.45368.1::g.185098::m.185098	1320.5	-0.444405	0.171848	-2.58604	0.00970865	0.214381
Gene.204628::CIGENEomyV6.50957.1::g.204628::m.204628	40.0323	-0.704612	0.272381	-2.58686	0.00968559	0.214381
Gene.230323::CIGENEomyV6.54406.1::g.230323::m.230323	4.22029	-0.545987	0.211132	-2.586	0.00970964	0.214381
Gene.236321::CIGENEomyV6.59161.1::g.236321::m.236321	587.763	0.683275	0.26438	2.58444	0.00975363	0.214381
Gene.269980::CIGENEomyV6.66003.1::g.269980::m.269980	268.788	-0.507738	0.196365	-2.58569	0.00971846	0.214381
Gene.348842::CIGENEomyV6.86680.2::g.348842::m.348842	272.617	0.572098	0.22134	2.5847	0.00974629	0.214381
Gene.45177::CIGENEomyV6.9456.1::g.45177::m.45177	16.1692	0.703847	0.27223	2.58548	0.00972424	0.214381
Gene.63642::CIGENEomyV6.16101.1::g.63642::m.63642	284.019	0.423606	0.163889	2.58472	0.00974584	0.214381
Gene.84128::CIGENEomyV6.19847.2::g.84128::m.84128	18.3986	-0.723215	0.279772	-2.58502	0.00973731	0.214381
Gene.178885::CIGENEomyV6.40034.1::g.178885::m.178885	1986.59	0.4778	0.184897	2.58413	0.00976239	0.214437
Gene.149604::CIGENEomyV6.34811.2::g.149604::m.149604	2786.73	-0.373766	0.144654	-2.58386	0.00977028	0.214474
Gene.114447::CIGENEomyV6.27924.7::g.114447::m.114447	303.667	-0.41007	0.158719	-2.58362	0.00977695	0.214477
Gene.114603::CIGENEomyV6.27018.1::g.114603::m.114603	199.557	0.567349	0.219615	2.58338	0.00978361	0.214477
Gene.323240::CIGENEomyV6.77211.1::g.323240::m.323240	361.722	-0.43952	0.170146	-2.58319	0.00978905	0.214477
Gene.106325::CIGENEomyV6.25219.1::g.106325::m.106325	926.511	-0.503188	0.194844	-2.58252	0.00980803	0.214757
Gene.107036::CIGENEomyV6.25562.3::g.107036::m.107036	53.2939	0.48808	0.189051	2.58174	0.00983049	0.214976
Gene.37697::CIGENEomyV6.10007.1::g.37697::m.37697	37.0283	-0.706215	0.273522	-2.58194	0.00982481	0.214976
Gene.101248::CIGENEomyV6.24431.1::g.101248::m.101248	462.961	-0.391934	0.151953	-2.57931	0.00989991	0.215908
Gene.156273::CIGENEomyV6.38390.1::g.156273::m.156273	291.15	-0.537674	0.208495	-2.57883	0.00991345	0.215908
Gene.203569::CIGENEomyV6.49096.1::g.203569::m.203569	276.506	0.414412	0.160672	2.57925	0.00990147	0.215908
Gene.231120::CIGENEomyV6.55883.1::g.231120::m.231120	987.844	0.478853	0.18564	2.57947	0.00989508	0.215908
Gene.253423::CIGENEomyV6.63326.1::g.253423::m.253423	114.978	-0.499532	0.193726	-2.57855	0.00992153	0.215908
Gene.259116::CIGENEomyV6.62096.1::g.259116::m.259116	72.8652	-0.714675	0.277167	-2.5785	0.00992314	0.215908
Gene.355781::CIGENEomyV6.87458.1::g.355781::m.355781	15.888	-0.711697	0.276005	-2.57856	0.00992131	0.215908
Gene.81435::CIGENEomyV6.21793.1::g.81435::m.81435	18.3077	-0.667764	0.258897	-2.57927	0.00990093	0.215908
Gene.201415::CIGENEomyV6.50070.1::g.201415::m.201415	13.5552	0.71054	0.27567	2.5775	0.00995168	0.21638
Gene.292483::CIGENEomyV6.71408.2::g.292483::m.292483	478.219	-0.390086	0.151363	-2.57715	0.00996182	0.21638
Gene.60895::CIGENEomyV6.18251.1::g.60895::m.60895	31.2301	-0.721549	0.279986	-2.57709	0.00996361	0.21638
Gene.136158::CIGENEomyV6.32676.1::g.136158::m.136158	109.214	-0.624571	0.242428	-2.57632	0.00998586	0.216726
Gene.136611::CIGENEomyV6.32732.1::g.136611::m.136611	5594.11	-0.337967	0.131271	-2.57457	0.0100365	0.216867
Gene.153305::CIGENEomyV6.38583.1::g.153305::m.153305	125.889	-0.720211	0.279769	-2.5743	0.0100443	0.216867
Gene.176350::CIGENEomyV6.42248.1::g.176350::m.176350	449.55	0.397068	0.154199	2.57503	0.010023	0.216867
Gene.231547::CIGENEomyV6.54342.1::g.231547::m.231547	3333.73	-0.454435	0.176538	-2.57414	0.0100489	0.216867
Gene.232356::CIGENEomyV6.56104.4::g.232356::m.232356	2112.4	-0.32528	0.126299	-2.57548	0.01001	0.216867
Gene.31337::CIGENEomyV6.11257.1::g.31337::m.31337	67.4108	0.62498	0.242714	2.57496	0.0100252	0.216867
Gene.35643::CIGENEomyV6.9964.3::g.35643::m.35643	131.91	0.511013	0.198466	2.57481	0.0100295	0.216867
Gene.43253::CIGENEomyV6.11070.2::g.43253::m.43253	15.9821	0.720338	0.279835	2.57415	0.0100486	0.216867
Gene.70548::CIGENEomyV6.17521.1::g.70548::m.70548	31.6779	-0.663873	0.257728	-2.57586	0.00999901	0.216867
Gene.368056::CIGENEomyV6.97068.1::g.368056::m.368056	10.7458	0.67125	0.260836	2.57346	0.0100689	0.217163
Gene.213080::CIGENEomyV6.52722.1::g.213080::m.213080	669.621	-0.456454	0.177386	-2.57322	0.0100757	0.217174
Gene.370482::CIGENEomyV6.98896.1::g.370482::m.370482	7.28357	0.674715	0.262229	2.573	0.0100821	0.217177
Gene.108471::CIGENEomyV6.28944.1::g.108471::m.108471	338.814	0.478404	0.186013	2.57189	0.0101146	0.217741
Gene.331494::CIGENEomyV6.81258.6::g.331494::m.331494	152.428	0.563267	0.21903	2.57164	0.0101218	0.217761
Gene.103489::CIGENEomyV6.24513.1::g.103489::m.103489	177.009	0.565182	0.220222	2.56642	0.0102755	0.217896
Gene.114317::CIGENEomyV6.26429.1::g.114317::m.114317	66.1691	-0.589482	0.22947	-2.56889	0.0102026	0.217896
Gene.152671::CIGENEomyV6.38551.1::g.152671::m.152671	22.6592	0.719496	0.279909	2.57046	0.0101563	0.217896
Gene.159751::CIGENEomyV6.38596.2::g.159751::m.159751	289.405	0.56857	0.221304	2.56918	0.0101938	0.217896
Gene.169424::CIGENEomyV6.41686.1::g.169424::m.169424	15708.6	0.542732	0.211503	2.56607	0.0102857	0.217896
Gene.171746::CIGENEomyV6.41494.2::g.171746::m.171746	33.3303	-0.704327	0.274217	-2.5685	0.0102139	0.217896
Gene.194848::CIGENEomyV6.45396.1::g.194848::m.194848	15.2506	0.706658	0.275476	2.56522	0.010311	0.217896
Gene.200506::CIGENEomyV6.50913.1::g.200506::m.200506	23.9108	0.719147	0.279842	2.56983	0.0101749	0.217896
Gene.220507::CIGENEomyV6.53161.7::g.220507::m.220507	281.99	-0.610005	0.237799	-2.56522	0.0103111	0.217896
Gene.226888::CIGENEomyV6.55654.1::g.226888::m.226888	391.07	0.682595	0.265925	2.56688	0.010262	0.217896
Gene.233307::CIGENEomyV6.56720.1::g.233307::m.233307	29.8767	0.713332	0.278067	2.56532	0.010308	0.217896
Gene.237678::CIGENEomyV6.57998.4::g.237678::m.237678	3455.22	-0.636513	0.24772	-2.56949	0.0101849	0.217896
Gene.23794::CIGENEomyV6.6484.1::g.23794::m.23794	24.4694	0.662826	0.258379	2.56532	0.0103079	0.217896
Gene.248448::CIGENEomyV6.59764.1::g.248448::m.248448	166.905	0.585103	0.227817	2.5683	0.01022	0.217896
Gene.254742::CIGENEomyV6.63493.1::g.254742::m.254742	260.345	-0.686809	0.26731	-2.56934	0.0101893	0.217896
Gene.269231::CIGENEomyV6.65181.1::g.269231::m.269231	183.619	0.629677	0.244907	2.57109	0.0101378	0.217896
Gene.271822::CIGENEomyV6.65823.1::g.271822::m.271822	138.211	0.503156	0.195852	2.56905	0.0101976	0.217896
Gene.281500::CIGENEomyV6.70000.1::g.281500::m.281500	44.446	-0.717666	0.279449	-2.56814	0.0102245	0.217896
Gene.320639::CIGENEomyV6.76608.2::g.320639::m.320639	269.423	0.582497	0.226894	2.56727	0.0102504	0.217896
Gene.327856::CIGENEomyV6.80384.1::g.327856::m.327856	640.319	-0.636566	0.247625	-2.57068	0.0101499	0.217896
Gene.336196::CIGENEomyV6.82139.1::g.336196::m.336196	263.424	0.550839	0.214325	2.57011	0.0101666	0.217896
Gene.351465::CIGENEomyV6.86494.1::g.351465::m.351465	351.892	0.409835	0.159748	2.56551	0.0103025	0.217896
Gene.352836::CIGENEomyV6.86488.4::g.352836::m.352836	185.798	0.352865	0.137533	2.56567	0.0102977	0.217896
Gene.37408::CIGENEomyV6.10267.3::g.37408::m.37408	632.284	-0.410443	0.1599	-2.56686	0.0102623	0.217896
Gene.5174::CIGENEomyV6.2330.1::g.5174::m.5174	359.055	0.65924	0.256549	2.56964	0.0101803	0.217896
Gene.56132::CIGENEomyV6.13995.2::g.56132::m.56132	10.8308	0.715874	0.278924	2.56656	0.0102714	0.217896
Gene.82296::CIGENEomyV6.22213.2::g.82296::m.82296	516.395	0.472636	0.184068	2.56773	0.0102368	0.217896
Gene.85682::CIGENEomyV6.22334.1::g.85682::m.85682	131.586	0.661283	0.257488	2.56821	0.0102225	0.217896
Gene.99859::CIGENEomyV6.24730.1::g.99859::m.99859	10.0017	-0.641872	0.250218	-2.56524	0.0103103	0.217896
Gene.116790::CIGENEomyV6.28852.1::g.116790::m.116790	76.3206	-0.716605	0.2794	-2.5648	0.0103235	0.218025
Gene.222991::CIGENEomyV6.56907.3::g.222991::m.222991	52.553	0.673037	0.26246	2.56434	0.0103373	0.218182
Gene.67701::CIGENEomyV6.17969.1::g.67701::m.67701	77.6858	-0.567028	0.221205	-2.56336	0.0103665	0.218666
Gene.293834::CIGENEomyV6.72338.1::g.293834::m.293834	25.1851	0.655967	0.256001	2.56236	0.0103963	0.218893
Gene.88065::CIGENEomyV6.20109.4::g.88065::m.88065	339.118	0.431788	0.168484	2.56277	0.010384	0.218893
Gene.90389::CIGENEomyV6.21561.4::g.90389::m.90389	376.363	0.578981	0.225941	2.56252	0.0103914	0.218893
Gene.252360::CIGENEomyV6.61610.1::g.252360::m.252360	45.2478	0.662245	0.258485	2.56203	0.0104063	0.21897
Gene.169579::CIGENEomyV6.41504.1::g.169579::m.169579	33.457	-0.581047	0.226861	-2.56124	0.0104299	0.219204
Gene.27318::CIGENEomyV6.6945.1::g.27318::m.27318	552.031	-0.617242	0.240995	-2.56123	0.0104303	0.219204
Gene.68947::CIGENEomyV6.18176.1::g.68947::m.68947	2083.98	-0.450569	0.175933	-2.56102	0.0104365	0.219204
Gene.23510::CIGENEomyV6.5744.1::g.23510::m.23510	1277.45	-0.654137	0.255477	-2.56046	0.0104534	0.219427
Gene.18088::CIGENEomyV6.5826.2::g.18088::m.18088	183.692	0.496327	0.193882	2.55995	0.0104688	0.219439
Gene.310942::CIGENEomyV6.75029.1::g.310942::m.310942	274.169	0.521267	0.203635	2.55981	0.0104731	0.219439
Gene.348034::CIGENEomyV6.84998.1::g.348034::m.348034	102.81	-0.500186	0.195392	-2.55991	0.0104699	0.219439
Gene.130895::CIGENEomyV6.30381.2::g.130895::m.130895	25.5838	0.656603	0.256554	2.55931	0.0104879	0.219483
Gene.18587::CIGENEomyV6.4653.1::g.18587::m.18587	302.313	-0.486102	0.189927	-2.55942	0.0104847	0.219483
Gene.277592::CIGENEomyV6.68312.2::g.277592::m.277592	4152.46	-0.666416	0.260474	-2.55848	0.0105132	0.219878
Gene.291752::CIGENEomyV6.72181.1::g.291752::m.291752	60.1374	-0.673382	0.263243	-2.55802	0.010527	0.220035
Gene.275025::CIGENEomyV6.67577.1::g.275025::m.275025	542.341	-0.58098	0.227145	-2.55775	0.0105352	0.220072
Gene.269928::CIGENEomyV6.65343.1::g.269928::m.269928	70.3906	0.673478	0.263399	2.55687	0.0105618	0.220495
Gene.98593::CIGENEomyV6.26286.1::g.98593::m.98593	506.858	-0.621432	0.243066	-2.55664	0.0105689	0.220509
Gene.14237::CIGENEomyV6.1613.1::g.14237::m.14237	1329.87	0.29531	0.115528	2.55617	0.0105831	0.220673
Gene.181808::CIGENEomyV6.46898.1::g.181808::m.181808	609.441	-0.491457	0.192314	-2.55549	0.0106038	0.220972
Gene.273506::CIGENEomyV6.65158.1::g.273506::m.273506	978.985	-0.382126	0.149556	-2.55507	0.0106166	0.221104
Gene.152386::CIGENEomyV6.37681.1::g.152386::m.152386	307.248	-0.459765	0.18001	-2.5541	0.0106461	0.221343
Gene.82974::CIGENEomyV6.20099.1::g.82974::m.82974	623.467	-0.306903	0.120162	-2.55407	0.0106473	0.221343
Gene.86936::CIGENEomyV6.22645.1::g.86936::m.86936	23.0961	0.663647	0.259828	2.55418	0.0106439	0.221343
Gene.158316::CIGENEomyV6.39055.1::g.158316::m.158316	188.445	0.597889	0.234178	2.55314	0.0106756	0.221408
Gene.177965::CIGENEomyV6.42854.1::g.177965::m.177965	1546.13	0.620381	0.243012	2.55288	0.0106836	0.221408
Gene.298225::CIGENEomyV6.71081.1::g.298225::m.298225	41.5063	-0.704895	0.276149	-2.55259	0.0106925	0.221408
Gene.354607::CIGENEomyV6.86363.1::g.354607::m.354607	417.415	-0.489712	0.191793	-2.55334	0.0106694	0.221408
Gene.77335::CIGENEomyV6.16943.1::g.77335::m.77335	490.781	-0.431367	0.168934	-2.55347	0.0106657	0.221408
Gene.81465::CIGENEomyV6.20501.1::g.81465::m.81465	199.054	0.509765	0.199664	2.55311	0.0106764	0.221408
Gene.81920::CIGENEomyV6.22204.1::g.81920::m.81920	50.1465	0.614177	0.240618	2.5525	0.0106953	0.221408
Gene.166476::CIGENEomyV6.40070.1::g.166476::m.166476	277.464	-0.559111	0.219108	-2.55177	0.0107178	0.221524
Gene.53522::CIGENEomyV6.12754.1::g.53522::m.53522	58.8648	-0.693208	0.271646	-2.55188	0.0107144	0.221524
Gene.94934::CIGENEomyV6.26353.1::g.94934::m.94934	14.4909	-0.710703	0.278522	-2.55169	0.0107201	0.221524
Gene.101657::CIGENEomyV6.26166.1::g.101657::m.101657	179.428	0.624921	0.244978	2.55093	0.0107436	0.221752
Gene.268236::CIGENEomyV6.64887.1::g.268236::m.268236	37029.2	0.422562	0.165688	2.55034	0.0107616	0.221752
Gene.290928::CIGENEomyV6.71780.6::g.290928::m.290928	1193.42	0.615661	0.241408	2.55029	0.0107633	0.221752
Gene.322310::CIGENEomyV6.79852.1::g.322310::m.322310	57.298	0.675501	0.264859	2.55042	0.0107593	0.221752
Gene.343713::CIGENEomyV6.84085.1::g.343713::m.343713	796.309	-0.604099	0.236828	-2.5508	0.0107477	0.221752
Gene.192463::CIGENEomyV6.46690.1::g.192463::m.192463	314.862	-0.551527	0.216297	-2.54986	0.0107767	0.221896
Gene.119430::CIGENEomyV6.26857.1::g.119430::m.119430	42.1462	0.578174	0.226799	2.54927	0.0107947	0.222095
Gene.89774::CIGENEomyV6.22704.11::g.89774::m.89774	166.877	0.463069	0.181658	2.54913	0.0107992	0.222095
Gene.14857::CIGENEomyV6.4603.1::g.14857::m.14857	4186.33	-0.514131	0.201716	-2.54878	0.01081	0.222184
Gene.151762::CIGENEomyV6.37353.3::g.151762::m.151762	817.97	-0.496906	0.194978	-2.54852	0.0108181	0.222219
Gene.272906::CIGENEomyV6.64783.1::g.272906::m.272906	427.017	0.606467	0.237992	2.54827	0.010826	0.222249
Gene.215661::CIGENEomyV6.52591.1::g.215661::m.215661	45.345	-0.675166	0.265011	-2.54769	0.0108438	0.222309
Gene.255327::CIGENEomyV6.63500.7::g.255327::m.255327	293.057	0.544686	0.213784	2.54784	0.0108392	0.222309
Gene.83435::CIGENEomyV6.19878.1::g.83435::m.83435	226.81	0.610448	0.239622	2.54755	0.0108482	0.222309
Gene.109998::CIGENEomyV6.29917.1::g.109998::m.109998	8.03629	-0.524152	0.205856	-2.5462	0.0108902	0.222635
Gene.118140::CIGENEomyV6.28576.1::g.118140::m.118140	1771.26	-0.290679	0.114137	-2.54676	0.0108729	0.222635
Gene.152534::CIGENEomyV6.39591.1::g.152534::m.152534	99.4759	-0.467716	0.183684	-2.5463	0.0108871	0.222635
Gene.191032::CIGENEomyV6.46392.7::g.191032::m.191032	163.319	-0.530483	0.208363	-2.54596	0.0108978	0.222635
Gene.19189::CIGENEomyV6.3757.6::g.19189::m.19189	21.4517	0.711988	0.279695	2.54559	0.0109093	0.222635
Gene.367411::CIGENEomyV6.96595.1::g.367411::m.367411	19.97	0.663568	0.260587	2.54644	0.0108829	0.222635
Gene.369170::CIGENEomyV6.97916.1::g.369170::m.369170	21.9926	0.638912	0.250981	2.54566	0.010907	0.222635
Gene.135780::CIGENEomyV6.32500.1::g.135780::m.135780	173.433	-0.546607	0.214756	-2.54524	0.0109201	0.222703
Gene.368078::CIGENEomyV6.97082.1::g.368078::m.368078	8.51375	0.694753	0.273024	2.54466	0.0109384	0.222703
Gene.45402::CIGENEomyV6.11206.1::g.45402::m.45402	13.9151	0.707903	0.278187	2.5447	0.0109371	0.222703
Gene.88082::CIGENEomyV6.20705.1::g.88082::m.88082	395.69	0.610461	0.239861	2.54506	0.0109258	0.222703
Gene.81000::CIGENEomyV6.20594.1::g.81000::m.81000	67.2353	0.708607	0.278504	2.54433	0.0109487	0.22278
Gene.118775::CIGENEomyV6.27186.2::g.118775::m.118775	141.635	0.51351	0.201854	2.54397	0.0109599	0.222878
Gene.131619::CIGENEomyV6.31391.3::g.131619::m.131619	236.658	0.679045	0.267044	2.54282	0.0109961	0.2229
Gene.163282::CIGENEomyV6.42987.2::g.163282::m.163282	366.22	0.623503	0.245196	2.54287	0.0109945	0.2229
Gene.165665::CIGENEomyV6.42714.1::g.165665::m.165665	832.13	-0.331238	0.130277	-2.54256	0.0110043	0.2229
Gene.23424::CIGENEomyV6.3717.1::g.23424::m.23424	669.857	0.422245	0.166075	2.5425	0.0110062	0.2229
Gene.300979::CIGENEomyV6.73314.2::g.300979::m.300979	116.784	0.700545	0.275531	2.54252	0.0110055	0.2229
Gene.320151::CIGENEomyV6.78384.1::g.320151::m.320151	165.934	0.579327	0.22781	2.54303	0.0109895	0.2229
Gene.373168::CIGENEomyV6.100864.1::g.373168::m.373168	21.9184	0.377497	0.148407	2.54366	0.0109699	0.2229
Gene.289203::CIGENEomyV6.68501.7::g.289203::m.289203	67.6607	-0.544263	0.214121	-2.54184	0.0110269	0.223189
Gene.52635::CIGENEomyV6.12972.1::g.52635::m.52635	3430.63	-0.295045	0.116113	-2.54102	0.0110531	0.223587
Gene.138311::CIGENEomyV6.35487.2::g.138311::m.138311	292.559	-0.33411	0.131583	-2.53917	0.0111117	0.223598
Gene.159260::CIGENEomyV6.37879.1::g.159260::m.159260	290.199	-0.506246	0.199338	-2.53963	0.011097	0.223598
Gene.279914::CIGENEomyV6.66668.1::g.279914::m.279914	663.116	-0.348097	0.137087	-2.53923	0.0111096	0.223598
Gene.286887::CIGENEomyV6.68958.8::g.286887::m.286887	115.323	-0.535269	0.210759	-2.53972	0.0110942	0.223598
Gene.292352::CIGENEomyV6.71215.1::g.292352::m.292352	368.954	0.425607	0.167522	2.5406	0.0110664	0.223598
Gene.305587::CIGENEomyV6.74669.1::g.305587::m.305587	14.8255	-0.708556	0.279051	-2.53917	0.0111117	0.223598
Gene.4467::CIGENEomyV6.3292.1::g.4467::m.4467	77.3499	-0.675035	0.265757	-2.54005	0.0110838	0.223598
Gene.5171::CIGENEomyV6.1603.1::g.5171::m.5171	131.778	0.394218	0.155255	2.53916	0.0111119	0.223598
Gene.99230::CIGENEomyV6.24795.1::g.99230::m.99230	116.931	-0.487352	0.191841	-2.54039	0.0110728	0.223598
Gene.275403::CIGENEomyV6.67334.1::g.275403::m.275403	1081.05	0.509233	0.200631	2.53816	0.0111438	0.224109
Gene.81339::CIGENEomyV6.20658.1::g.81339::m.81339	814.096	-0.373098	0.147098	-2.53639	0.0112003	0.225115
Gene.351375::CIGENEomyV6.86735.2::g.351375::m.351375	1070.32	0.293822	0.115867	2.53585	0.0112175	0.225329
Gene.304729::CIGENEomyV6.74272.1::g.304729::m.304729	1235.67	0.515129	0.203174	2.5354	0.0112317	0.225484
Gene.247185::CIGENEomyV6.59500.3::g.247185::m.247185	1787.26	-0.371901	0.14672	-2.53477	0.0112522	0.225652
Gene.74652::CIGENEomyV6.18125.1::g.74652::m.74652	68.0073	0.549914	0.216951	2.53474	0.0112532	0.225652
Gene.110794::CIGENEomyV6.28423.1::g.110794::m.110794	477.476	-0.385905	0.152335	-2.53326	0.0113008	0.226209
Gene.136663::CIGENEomyV6.30734.3::g.136663::m.136663	22.7126	0.700908	0.276792	2.53226	0.0113331	0.226209
Gene.143096::CIGENEomyV6.33745.1::g.143096::m.143096	85.2617	0.60401	0.238399	2.53361	0.0112894	0.226209
Gene.18836::CIGENEomyV6.5576.1::g.18836::m.18836	150.01	0.538868	0.212811	2.53215	0.0113367	0.226209
Gene.252548::CIGENEomyV6.61649.1::g.252548::m.252548	93.8909	0.706234	0.278792	2.53319	0.0113029	0.226209
Gene.269002::CIGENEomyV6.64019.1::g.269002::m.269002	260.669	-0.53726	0.212153	-2.53242	0.011328	0.226209
Gene.274728::CIGENEomyV6.67293.1::g.274728::m.274728	177.447	0.616918	0.243563	2.53289	0.0113127	0.226209
Gene.337931::CIGENEomyV6.83599.1::g.337931::m.337931	7.6661	-0.703596	0.277876	-2.53205	0.0113399	0.226209
Gene.35921::CIGENEomyV6.7603.1::g.35921::m.35921	140.221	-0.553919	0.218735	-2.53238	0.0113292	0.226209
Gene.159257::CIGENEomyV6.37300.1::g.159257::m.159257	776.965	0.473011	0.187	2.52947	0.0114236	0.226951
Gene.204885::CIGENEomyV6.50109.1::g.204885::m.204885	86.6839	-0.646449	0.255586	-2.52929	0.0114294	0.226951
Gene.221524::CIGENEomyV6.56089.1::g.221524::m.221524	1747.07	-0.399247	0.157847	-2.52933	0.011428	0.226951
Gene.221634::CIGENEomyV6.55971.1::g.221634::m.221634	1978.84	0.526045	0.208006	2.52898	0.0114393	0.226951
Gene.237726::CIGENEomyV6.58477.1::g.237726::m.237726	440.839	-0.337094	0.133307	-2.52871	0.0114482	0.226951
Gene.250999::CIGENEomyV6.61990.1::g.250999::m.250999	470.452	0.310405	0.122682	2.53017	0.0114008	0.226951
Gene.25709::CIGENEomyV6.4875.1::g.25709::m.25709	5.40375	-0.491452	0.194251	-2.52998	0.0114068	0.226951
Gene.321640::CIGENEomyV6.79069.1::g.321640::m.321640	487.478	0.410534	0.162238	2.53044	0.011392	0.226951
Gene.341106::CIGENEomyV6.84408.2::g.341106::m.341106	42.5102	0.692042	0.273614	2.52926	0.0114303	0.226951
Gene.346954::CIGENEomyV6.84443.2::g.346954::m.346954	1531.97	-0.404843	0.160101	-2.52867	0.0114494	0.226951
Gene.54109::CIGENEomyV6.13073.2::g.54109::m.54109	26.5341	0.685165	0.270799	2.53017	0.0114009	0.226951
Gene.119402::CIGENEomyV6.29363.2::g.119402::m.119402	431.82	0.665769	0.263335	2.52822	0.0114641	0.226982
Gene.201830::CIGENEomyV6.47662.1::g.201830::m.201830	58.877	-0.70285	0.277987	-2.52835	0.0114599	0.226982
Gene.154114::CIGENEomyV6.39491.1::g.154114::m.154114	5.86442	0.684879	0.270963	2.52757	0.0114854	0.227143
Gene.189970::CIGENEomyV6.46849.1::g.189970::m.189970	27.4643	0.707093	0.279738	2.5277	0.0114813	0.227143
Gene.295940::CIGENEomyV6.72134.2::g.295940::m.295940	688.727	-0.356483	0.141054	-2.52728	0.011495	0.227202
Gene.199747::CIGENEomyV6.48663.1::g.199747::m.199747	905.399	-0.482688	0.19109	-2.52597	0.011538	0.227661
Gene.231596::CIGENEomyV6.55239.1::g.231596::m.231596	79.8299	0.707222	0.279952	2.52622	0.0115296	0.227661
Gene.341857::CIGENEomyV6.85195.21::g.341857::m.341857	9.03362	-0.590539	0.233785	-2.52599	0.0115374	0.227661
Gene.51145::CIGENEomyV6.14358.1::g.51145::m.51145	1545.26	0.460766	0.18243	2.52572	0.0115463	0.227694
Gene.101572::CIGENEomyV6.24197.1::g.101572::m.101572	70.7184	0.556562	0.220444	2.52473	0.0115786	0.228201
Gene.104371::CIGENEomyV6.25861.2::g.104371::m.104371	780.035	0.561519	0.22255	2.52311	0.0116322	0.228405
Gene.108288::CIGENEomyV6.28396.1::g.108288::m.108288	104.599	0.512727	0.203228	2.52292	0.0116384	0.228405
Gene.238049::CIGENEomyV6.58447.1::g.238049::m.238049	58.7198	0.594569	0.235644	2.52317	0.0116303	0.228405
Gene.321571::CIGENEomyV6.78505.1::g.321571::m.321571	488.346	-0.548458	0.217399	-2.52282	0.0116418	0.228405
Gene.342955::CIGENEomyV6.85080.1::g.342955::m.342955	118.596	0.66477	0.263467	2.52316	0.0116306	0.228405
Gene.348012::CIGENEomyV6.85097.1::g.348012::m.348012	108.137	0.562651	0.222948	2.52369	0.011613	0.228405
Gene.51947::CIGENEomyV6.14469.2::g.51947::m.51947	267.46	-0.511726	0.202745	-2.52399	0.0116031	0.228405
Gene.8232::CIGENEomyV6.1289.1::g.8232::m.8232	93.7268	0.568103	0.225157	2.52314	0.0116313	0.228405
Gene.331670::CIGENEomyV6.81204.11::g.331670::m.331670	282.131	0.560123	0.222065	2.52234	0.0116576	0.228585
Gene.316105::CIGENEomyV6.77672.1::g.316105::m.316105	1674.64	0.299802	0.118908	2.52129	0.0116925	0.229139
Gene.314072::CIGENEomyV6.80089.3::g.314072::m.314072	63.0473	0.668858	0.265354	2.52062	0.0117148	0.229342
Gene.356320::CIGENEomyV6.86766.1::g.356320::m.356320	497.451	-0.478421	0.189806	-2.52058	0.0117162	0.229342
Gene.141969::CIGENEomyV6.35481.1::g.141969::m.141969	12.2659	0.704077	0.27948	2.51924	0.0117608	0.229528
Gene.209494::CIGENEomyV6.50602.5::g.209494::m.209494	166.667	0.541383	0.214926	2.51893	0.0117713	0.229528
Gene.227050::CIGENEomyV6.54886.1::g.227050::m.227050	1265.51	0.608375	0.241579	2.51833	0.0117912	0.229528
Gene.240869::CIGENEomyV6.59599.1::g.240869::m.240869	984.014	0.425448	0.168923	2.5186	0.0117823	0.229528
Gene.267975::CIGENEomyV6.66061.3::g.267975::m.267975	2505.59	-0.687647	0.272961	-2.51921	0.0117617	0.229528
Gene.268042::CIGENEomyV6.64316.1::g.268042::m.268042	95.7081	0.58376	0.231649	2.52003	0.0117346	0.229528
Gene.330211::CIGENEomyV6.80262.1::g.330211::m.330211	384.517	-0.474903	0.18858	-2.5183	0.0117921	0.229528
Gene.353039::CIGENEomyV6.87696.1::g.353039::m.353039	674.342	-0.455071	0.180669	-2.51882	0.011775	0.229528
Gene.5035::CIGENEomyV6.839.1::g.5035::m.5035	555.452	0.524374	0.208103	2.51978	0.0117427	0.229528
Gene.66590::CIGENEomyV6.16663.1::g.66590::m.66590	14.9812	-0.70527	0.279956	-2.51922	0.0117617	0.229528
Gene.117567::CIGENEomyV6.26504.2::g.117567::m.117567	28.9516	0.683734	0.271583	2.51758	0.0118163	0.229739
Gene.373710::CIGENEomyV6.101326.1::g.373710::m.373710	10.6299	-0.649968	0.25816	-2.5177	0.0118125	0.229739
Gene.130414::CIGENEomyV6.31601.1::g.130414::m.130414	691.901	0.426319	0.169368	2.51711	0.0118322	0.22979
Gene.259436::CIGENEomyV6.63217.1::g.259436::m.259436	32.5131	-0.701066	0.278509	-2.51721	0.0118287	0.22979
Gene.302989::CIGENEomyV6.73866.3::g.302989::m.302989	2181.94	-0.298162	0.118473	-2.5167	0.011846	0.229927
Gene.197400::CIGENEomyV6.48279.1::g.197400::m.197400	202.231	0.594588	0.236287	2.51638	0.0118568	0.230009
Gene.312881::CIGENEomyV6.78440.1::g.312881::m.312881	183.523	-0.662996	0.263535	-2.51578	0.0118769	0.23027
Gene.157341::CIGENEomyV6.38092.2::g.157341::m.157341	79.7964	-0.617845	0.245716	-2.51447	0.0119212	0.230379
Gene.157646::CIGENEomyV6.36499.3::g.157646::m.157646	1292.65	-0.44567	0.177228	-2.51468	0.0119141	0.230379
Gene.165211::CIGENEomyV6.41188.1::g.165211::m.165211	769.285	-0.471676	0.18754	-2.51507	0.0119009	0.230379
Gene.301586::CIGENEomyV6.73644.1::g.301586::m.301586	16.535	0.69384	0.275917	2.51466	0.0119146	0.230379
Gene.75284::CIGENEomyV6.16580.1::g.75284::m.75284	525.688	-0.687529	0.273434	-2.51443	0.0119226	0.230379
Gene.86285::CIGENEomyV6.20709.1::g.86285::m.86285	29.521	0.658985	0.261989	2.51532	0.0118925	0.230379
Gene.239873::CIGENEomyV6.60890.1::g.239873::m.239873	209.997	0.48813	0.194213	2.51338	0.011958	0.230418
Gene.267890::CIGENEomyV6.64239.1::g.267890::m.267890	10.6503	0.685548	0.272689	2.51403	0.0119361	0.230418
Gene.311363::CIGENEomyV6.75419.1::g.311363::m.311363	7.72598	-0.632833	0.251758	-2.51366	0.0119485	0.230418
Gene.318342::CIGENEomyV6.77072.1::g.318342::m.318342	9.2751	-0.687211	0.2734	-2.51357	0.0119516	0.230418
Gene.84671::CIGENEomyV6.20579.4::g.84671::m.84671	5.16611	0.645385	0.256724	2.51392	0.0119396	0.230418
Gene.270669::CIGENEomyV6.66530.1::g.270669::m.270669	14.4665	0.702996	0.279778	2.51269	0.0119815	0.230451
Gene.279267::CIGENEomyV6.67189.1::g.279267::m.279267	1289.47	0.515959	0.205346	2.51263	0.0119834	0.230451
Gene.369776::CIGENEomyV6.98459.1::g.369776::m.369776	24.2242	-0.628822	0.250272	-2.51255	0.0119861	0.230451
Gene.89454::CIGENEomyV6.22370.1::g.89454::m.89454	2107.35	0.576648	0.229508	2.51254	0.0119864	0.230451
Gene.282456::CIGENEomyV6.69922.2::g.282456::m.282456	59.7822	0.589038	0.234522	2.51165	0.0120169	0.230909
Gene.63432::CIGENEomyV6.16307.2::g.63432::m.63432	113.46	0.522601	0.208105	2.51123	0.0120312	0.231054
Gene.180219::CIGENEomyV6.41543.4::g.180219::m.180219	71.8758	0.668338	0.266197	2.51068	0.0120497	0.23115
Gene.246976::CIGENEomyV6.60627.1::g.246976::m.246976	8.01145	0.697087	0.277633	2.51082	0.0120452	0.23115
Gene.95256::CIGENEomyV6.25710.1::g.95256::m.95256	546.891	0.54338	0.216443	2.5105	0.0120562	0.23115
Gene.319385::CIGENEomyV6.80011.2::g.319385::m.319385	10.782	0.698802	0.278397	2.51009	0.0120699	0.231284
Gene.154017::CIGENEomyV6.38376.1::g.154017::m.154017	397.754	0.403135	0.160638	2.50959	0.0120871	0.231485
Gene.156385::CIGENEomyV6.37971.1::g.156385::m.156385	7.37357	0.698281	0.278338	2.50875	0.0121159	0.231907
Gene.187937::CIGENEomyV6.46225.1::g.187937::m.187937	897.683	0.394464	0.15726	2.50835	0.0121295	0.231911
Gene.243313::CIGENEomyV6.60845.1::g.243313::m.243313	39.8646	-0.691739	0.275765	-2.50844	0.0121267	0.231911
Gene.142789::CIGENEomyV6.34252.1::g.142789::m.142789	35.9406	-0.662394	0.264107	-2.50805	0.01214	0.231984
Gene.45044::CIGENEomyV6.8993.1::g.45044::m.45044	499.988	-0.39667	0.158175	-2.5078	0.0121487	0.232021
Gene.259638::CIGENEomyV6.62282.1::g.259638::m.259638	1130.73	-0.450603	0.179768	-2.50658	0.0121904	0.232689
Gene.154727::CIGENEomyV6.37477.1::g.154727::m.154727	348.722	0.482296	0.192441	2.5062	0.0122036	0.232813
Gene.151392::CIGENEomyV6.38595.4::g.151392::m.151392	2552.69	0.384139	0.153312	2.50561	0.0122241	0.233034
Gene.223819::CIGENEomyV6.56205.1::g.223819::m.223819	1017.46	-0.503175	0.200849	-2.50524	0.0122367	0.233034
Gene.323385::CIGENEomyV6.78117.1::g.323385::m.323385	5295.59	-0.323016	0.128954	-2.50489	0.0122489	0.233034
Gene.346671::CIGENEomyV6.84195.2::g.346671::m.346671	2937.48	0.648215	0.258743	2.50524	0.0122367	0.233034
Gene.368345::CIGENEomyV6.97370.2::g.368345::m.368345	5.23266	0.648208	0.258766	2.505	0.0122451	0.233034
Gene.124442::CIGENEomyV6.31960.1::g.124442::m.124442	597.554	0.261635	0.104461	2.50463	0.0122581	0.233079
Gene.339395::CIGENEomyV6.81895.1::g.339395::m.339395	17.1322	-0.634599	0.253393	-2.5044	0.0122659	0.233099
Gene.288072::CIGENEomyV6.69992.1::g.288072::m.288072	780.473	-0.457738	0.182928	-2.50228	0.0123395	0.234369
Gene.74549::CIGENEomyV6.18386.1::g.74549::m.74549	88.2891	0.445683	0.178141	2.50186	0.0123544	0.234523
Gene.204125::CIGENEomyV6.48720.1::g.204125::m.204125	53.5365	0.668875	0.267443	2.501	0.0123844	0.234955
Gene.33316::CIGENEomyV6.7574.2::g.33316::m.33316	13.4543	-0.688383	0.275263	-2.50082	0.0123908	0.234955
Gene.375931::CIGENEomyV6.103192.1::g.375931::m.375931	21.9222	-0.692563	0.276963	-2.50056	0.0123998	0.234996
Gene.353953::CIGENEomyV6.87434.2::g.353953::m.353953	287.315	-0.455404	0.18216	-2.50002	0.0124187	0.235227
Gene.260160::CIGENEomyV6.62001.1::g.260160::m.260160	785.646	0.390865	0.156382	2.49943	0.0124394	0.235361
Gene.375126::CIGENEomyV6.102457.1::g.375126::m.375126	12.6123	-0.696914	0.278824	-2.49947	0.0124378	0.235361
Gene.44623::CIGENEomyV6.8236.2::g.44623::m.44623	37.5422	0.681148	0.272552	2.49915	0.0124491	0.235414
Gene.194812::CIGENEomyV6.46144.1::g.194812::m.194812	156.292	0.581927	0.232909	2.49852	0.0124712	0.235704
Gene.188948::CIGENEomyV6.44996.1::g.188948::m.188948	153.496	0.497859	0.199361	2.49727	0.0125154	0.235766
Gene.237898::CIGENEomyV6.57749.1::g.237898::m.237898	4.22073	-0.645304	0.258332	-2.49796	0.0124909	0.235766
Gene.248548::CIGENEomyV6.58171.1::g.248548::m.248548	294.835	-0.487074	0.195019	-2.49757	0.0125047	0.235766
Gene.249106::CIGENEomyV6.58633.1::g.249106::m.249106	17.081	0.68407	0.273949	2.49707	0.0125223	0.235766
Gene.30532::CIGENEomyV6.10831.7::g.30532::m.30532	238.885	0.391212	0.156659	2.49722	0.012517	0.235766
Gene.354700::CIGENEomyV6.86604.1::g.354700::m.354700	841.28	-0.33453	0.133962	-2.49719	0.012518	0.235766
Gene.66024::CIGENEomyV6.17778.3::g.66024::m.66024	441.494	-0.335315	0.134237	-2.49793	0.0124921	0.235766
Gene.300620::CIGENEomyV6.73534.2::g.300620::m.300620	316.183	0.43017	0.172291	2.49676	0.0125334	0.235847
Gene.232579::CIGENEomyV6.56767.1::g.232579::m.232579	274.845	0.343051	0.137441	2.49598	0.0125608	0.236234
Gene.209129::CIGENEomyV6.50569.1::g.209129::m.209129	219.205	-0.420372	0.168495	-2.49487	0.0126004	0.236849
Gene.44350::CIGENEomyV6.10075.1::g.44350::m.44350	4.23328	0.660002	0.264654	2.49383	0.0126374	0.237416
Gene.179937::CIGENEomyV6.41834.1::g.179937::m.179937	742.655	0.603722	0.242107	2.49362	0.0126449	0.237427
Gene.123927::CIGENEomyV6.30168.1::g.123927::m.123927	612.23	-0.563104	0.225861	-2.49314	0.0126619	0.237488
Gene.252502::CIGENEomyV6.62491.5::g.252502::m.252502	468.171	-0.345915	0.138738	-2.4933	0.0126563	0.237488
Gene.355968::CIGENEomyV6.86738.2::g.355968::m.355968	261.549	-0.508176	0.203861	-2.49276	0.0126754	0.237613
Gene.54418::CIGENEomyV6.12714.1::g.54418::m.54418	148.726	-0.691501	0.277457	-2.49228	0.0126925	0.237803
Gene.29021::CIGENEomyV6.4711.7::g.29021::m.29021	1134.31	-0.678605	0.272321	-2.49193	0.0127051	0.237911
Gene.149018::CIGENEomyV6.35234.2::g.149018::m.149018	176.829	0.678015	0.272134	2.49147	0.0127215	0.238089
Gene.115182::CIGENEomyV6.27842.3::g.115182::m.115182	62.5327	0.584886	0.234783	2.49118	0.0127319	0.238153
Gene.27525::CIGENEomyV6.3875.1::g.27525::m.27525	161.993	-0.573171	0.230124	-2.49071	0.0127489	0.238286
Gene.303946::CIGENEomyV6.73658.1::g.303946::m.303946	405.495	0.518939	0.208359	2.4906	0.0127528	0.238286
Gene.285665::CIGENEomyV6.70146.1::g.285665::m.285665	30.0393	0.61051	0.245238	2.48946	0.0127937	0.238916
Gene.371704::CIGENEomyV6.99875.1::g.371704::m.371704	7.10092	0.651633	0.261776	2.48928	0.0128003	0.238916
Gene.376024::CIGENEomyV6.103319.5::g.376024::m.376024	22.0995	0.663593	0.266616	2.48894	0.0128123	0.239011
Gene.216081::CIGENEomyV6.52351.1::g.216081::m.216081	583.143	0.401045	0.161215	2.48764	0.0128595	0.239168
Gene.285662::CIGENEomyV6.68818.1::g.285662::m.285662	5.78139	-0.652758	0.262374	-2.48789	0.0128503	0.239168
Gene.300397::CIGENEomyV6.73989.1::g.300397::m.300397	25.7167	-0.621315	0.249769	-2.48756	0.0128623	0.239168
Gene.358730::CIGENEomyV6.89678.1::g.358730::m.358730	16.0591	0.664864	0.267213	2.48815	0.0128411	0.239168
Gene.51876::CIGENEomyV6.13381.1::g.51876::m.51876	792.461	-0.409863	0.164744	-2.48788	0.0128506	0.239168
Gene.6115::CIGENEomyV6.2008.11::g.6115::m.6115	213.023	0.450176	0.180903	2.4885	0.0128284	0.239168
Gene.276706::CIGENEomyV6.67387.4::g.276706::m.276706	1611.94	-0.498438	0.200413	-2.48705	0.0128807	0.239382
Gene.292063::CIGENEomyV6.71638.3::g.292063::m.292063	74.0742	0.608596	0.244758	2.48652	0.0128998	0.239478
Gene.4691::CIGENEomyV6.286.1::g.4691::m.4691	69.6117	0.521182	0.209592	2.48665	0.0128954	0.239478
Gene.157467::CIGENEomyV6.37932.1::g.157467::m.157467	321.809	0.404312	0.162662	2.48559	0.0129335	0.239976
Gene.139047::CIGENEomyV6.35793.1::g.139047::m.139047	9797.77	0.426597	0.171694	2.48464	0.0129683	0.240171
Gene.193596::CIGENEomyV6.45205.1::g.193596::m.193596	136.588	-0.568096	0.228687	-2.48416	0.0129858	0.240171
Gene.209567::CIGENEomyV6.49670.1::g.209567::m.209567	278.956	0.420581	0.16928	2.48453	0.0129723	0.240171
Gene.212514::CIGENEomyV6.53115.1::g.212514::m.212514	1742	-0.512093	0.206135	-2.48426	0.012982	0.240171
Gene.33525::CIGENEomyV6.9599.1::g.33525::m.33525	18.4699	-0.689739	0.277579	-2.48484	0.0129608	0.240171
Gene.339175::CIGENEomyV6.82830.1::g.339175::m.339175	12.7272	-0.685037	0.275744	-2.48432	0.0129798	0.240171
Gene.108340::CIGENEomyV6.27567.1::g.108340::m.108340	92.5035	0.631956	0.254494	2.48319	0.0130212	0.24058
Gene.210676::CIGENEomyV6.50594.3::g.210676::m.210676	466.073	0.46844	0.188659	2.48299	0.0130283	0.24058
Gene.338215::CIGENEomyV6.83392.1::g.338215::m.338215	9.15983	0.666656	0.26849	2.48298	0.0130288	0.24058
Gene.111116::CIGENEomyV6.29343.1::g.111116::m.111116	20.4016	-0.693307	0.279569	-2.47991	0.0131414	0.241275
Gene.163996::CIGENEomyV6.40713.1::g.163996::m.163996	2458.95	-0.507623	0.204579	-2.48131	0.0130902	0.241275
Gene.165291::CIGENEomyV6.40049.1::g.165291::m.165291	15.2008	-0.691927	0.278966	-2.48032	0.0131263	0.241275
Gene.211724::CIGENEomyV6.52002.1::g.211724::m.211724	71.9871	-0.577037	0.232606	-2.48075	0.0131106	0.241275
Gene.237518::CIGENEomyV6.58607.1::g.237518::m.237518	12.4781	-0.643824	0.259635	-2.47973	0.0131482	0.241275
Gene.270088::CIGENEomyV6.65829.1::g.270088::m.270088	992.669	0.619237	0.249656	2.48036	0.0131251	0.241275
Gene.27843::CIGENEomyV6.4445.2::g.27843::m.27843	35.7863	0.594276	0.239618	2.48009	0.0131348	0.241275
Gene.279516::CIGENEomyV6.67051.1::g.279516::m.279516	47.4471	0.634436	0.255756	2.48063	0.0131151	0.241275
Gene.3230::CIGENEomyV6.2738.1::g.3230::m.3230	54.3964	-0.65111	0.262618	-2.4793	0.0131641	0.241275
Gene.349038::CIGENEomyV6.85979.1::g.349038::m.349038	480.166	0.313663	0.126393	2.48166	0.0130773	0.241275
Gene.369167::CIGENEomyV6.97912.1::g.369167::m.369167	154.387	-0.579327	0.233615	-2.47984	0.0131441	0.241275
Gene.62182::CIGENEomyV6.17198.7::g.62182::m.62182	2202.85	-0.417905	0.168557	-2.47931	0.0131635	0.241275
Gene.76518::CIGENEomyV6.16532.1::g.76518::m.76518	354.152	-0.492948	0.198654	-2.48144	0.0130853	0.241275
Gene.93528::CIGENEomyV6.26008.13::g.93528::m.93528	42.7243	-0.657414	0.265162	-2.47929	0.0131643	0.241275
Gene.115981::CIGENEomyV6.26399.1::g.115981::m.115981	42.234	0.652445	0.263231	2.4786	0.01319	0.24149
Gene.344108::CIGENEomyV6.84950.2::g.344108::m.344108	855.339	-0.342848	0.138314	-2.47876	0.0131841	0.24149
Gene.112212::CIGENEomyV6.26587.1::g.112212::m.112212	14.1433	-0.693688	0.279964	-2.47778	0.0132203	0.241633
Gene.127766::CIGENEomyV6.32460.1::g.127766::m.127766	522.737	0.406742	0.164176	2.47748	0.0132315	0.241633
Gene.171672::CIGENEomyV6.41035.2::g.171672::m.171672	503.95	0.420366	0.169628	2.47816	0.0132062	0.241633
Gene.270585::CIGENEomyV6.64271.1::g.270585::m.270585	894.153	-0.501797	0.202592	-2.47688	0.0132535	0.241633
Gene.36310::CIGENEomyV6.10254.1::g.36310::m.36310	595.277	-0.405679	0.163762	-2.47725	0.0132399	0.241633
Gene.38396::CIGENEomyV6.11341.1::g.38396::m.38396	497.091	0.64275	0.259382	2.478	0.013212	0.241633
Gene.50850::CIGENEomyV6.13092.1::g.50850::m.50850	116.862	-0.621268	0.250775	-2.47739	0.0132346	0.241633
Gene.65027::CIGENEomyV6.16275.1::g.65027::m.65027	1785.28	0.299422	0.120887	2.47688	0.0132538	0.241633
Gene.286984::CIGENEomyV6.70401.1::g.286984::m.286984	341.018	-0.381351	0.154032	-2.47579	0.0132943	0.242012
Gene.295969::CIGENEomyV6.70983.1::g.295969::m.295969	8174.29	-0.661275	0.267074	-2.47599	0.0132866	0.242012
Gene.76529::CIGENEomyV6.18200.1::g.76529::m.76529	153.2	0.677623	0.273704	2.47575	0.0132956	0.242012
Gene.300029::CIGENEomyV6.74054.1::g.300029::m.300029	348.832	-0.416308	0.168193	-2.47519	0.0133166	0.242139
Gene.60545::CIGENEomyV6.13112.1::g.60545::m.60545	73.2158	0.685334	0.276865	2.47534	0.013311	0.242139
Gene.265635::CIGENEomyV6.64388.1::g.265635::m.265635	1104.83	0.272396	0.110076	2.47461	0.0133381	0.24218
Gene.291083::CIGENEomyV6.71624.1::g.291083::m.291083	24.4227	0.647627	0.261732	2.47439	0.0133465	0.24218
Gene.46830::CIGENEomyV6.9196.1::g.46830::m.46830	48.6604	-0.652282	0.263615	-2.47438	0.0133469	0.24218
Gene.89752::CIGENEomyV6.22425.1::g.89752::m.89752	9.63984	-0.682886	0.275945	-2.47471	0.0133343	0.24218
Gene.104693::CIGENEomyV6.25015.2::g.104693::m.104693	10487.1	-0.533952	0.215837	-2.47387	0.0133658	0.24227
Gene.135371::CIGENEomyV6.30349.3::g.135371::m.135371	321.689	-0.445667	0.180174	-2.47353	0.0133784	0.24227
Gene.216859::CIGENEomyV6.51341.1::g.216859::m.216859	346.677	0.489794	0.198047	2.47312	0.0133939	0.24227
Gene.244526::CIGENEomyV6.60389.1::g.244526::m.244526	1759.19	-0.446347	0.180472	-2.47322	0.01339	0.24227
Gene.25556::CIGENEomyV6.4919.1::g.25556::m.25556	289.005	0.347784	0.140599	2.47359	0.0133764	0.24227
Gene.347771::CIGENEomyV6.84759.1::g.347771::m.347771	1185.62	-0.498055	0.201374	-2.47329	0.0133876	0.24227
Gene.236868::CIGENEomyV6.59856.1::g.236868::m.236868	61.076	-0.54708	0.221244	-2.47275	0.0134079	0.242395
Gene.109330::CIGENEomyV6.29728.1::g.109330::m.109330	465.942	0.526905	0.213133	2.47219	0.0134287	0.242644
Gene.119375::CIGENEomyV6.27095.1::g.119375::m.119375	269.607	0.629038	0.254465	2.472	0.013436	0.242649
Gene.165185::CIGENEomyV6.42344.1::g.165185::m.165185	611.481	-0.529485	0.21423	-2.47157	0.0134522	0.242772
Gene.182547::CIGENEomyV6.46793.1::g.182547::m.182547	109.764	0.510033	0.20637	2.47144	0.0134568	0.242772
Gene.220254::CIGENEomyV6.51713.1::g.220254::m.220254	1624.41	-0.488535	0.197709	-2.47098	0.0134745	0.242963
Gene.330892::CIGENEomyV6.81217.3::g.330892::m.330892	114.703	-0.622522	0.251966	-2.47066	0.0134864	0.243051
Gene.201799::CIGENEomyV6.48597.1::g.201799::m.201799	63.9253	0.619096	0.250663	2.46984	0.0135174	0.243356
Gene.231086::CIGENEomyV6.55574.1::g.231086::m.231086	169.328	0.646116	0.261599	2.46987	0.0135162	0.243356
Gene.89401::CIGENEomyV6.20768.1::g.89401::m.89401	206.771	0.537168	0.217522	2.46949	0.0135306	0.243467
Gene.128152::CIGENEomyV6.31147.5::g.128152::m.128152	67.9177	-0.648142	0.262511	-2.46901	0.0135488	0.24354
Gene.46951::CIGENEomyV6.7699.1::g.46951::m.46951	87.3565	0.597545	0.242006	2.46914	0.0135439	0.24354
Gene.39063::CIGENEomyV6.10110.2::g.39063::m.39063	82.2723	0.61962	0.251027	2.46834	0.0135741	0.243868
Gene.229350::CIGENEomyV6.54930.1::g.229350::m.229350	157.001	0.626348	0.253855	2.46735	0.0136119	0.243912
Gene.253648::CIGENEomyV6.62533.2::g.253648::m.253648	69.1083	0.50947	0.206484	2.46735	0.0136117	0.243912
Gene.303943::CIGENEomyV6.72877.1::g.303943::m.303943	27.7685	-0.649486	0.263206	-2.46759	0.0136025	0.243912
Gene.320727::CIGENEomyV6.77776.1::g.320727::m.320727	49.4235	0.62495	0.253277	2.46745	0.0136078	0.243912
Gene.320941::CIGENEomyV6.79570.1::g.320941::m.320941	2289.14	0.608227	0.246496	2.46749	0.0136064	0.243912
Gene.108821::CIGENEomyV6.28965.1::g.108821::m.108821	2422.02	0.409108	0.165841	2.46686	0.0136302	0.244111
Gene.195195::CIGENEomyV6.47018.2::g.195195::m.195195	400.012	-0.57864	0.234582	-2.46668	0.0136371	0.244111
Gene.134451::CIGENEomyV6.31189.3::g.134451::m.134451	1769.07	-0.620948	0.251816	-2.46588	0.0136676	0.24441
Gene.167840::CIGENEomyV6.39821.1::g.167840::m.167840	56.6901	0.524153	0.212595	2.4655	0.0136821	0.24441
Gene.192010::CIGENEomyV6.45883.1::g.192010::m.192010	60.1117	-0.688769	0.279352	-2.46559	0.0136787	0.24441
Gene.196472::CIGENEomyV6.45122.2::g.196472::m.196472	731.438	-0.302604	0.122722	-2.46577	0.0136721	0.24441
Gene.269343::CIGENEomyV6.64899.1::g.269343::m.269343	177.86	0.480174	0.194788	2.46512	0.0136969	0.244421
Gene.374027::CIGENEomyV6.101613.13::g.374027::m.374027	240.011	-0.66921	0.271456	-2.46526	0.0136913	0.244421
Gene.188423::CIGENEomyV6.44740.1::g.188423::m.188423	12.3849	0.689369	0.279741	2.46431	0.0137276	0.244774
Gene.220319::CIGENEomyV6.52240.1::g.220319::m.220319	2656.81	-0.539618	0.218984	-2.46419	0.0137322	0.244774
Gene.247867::CIGENEomyV6.60048.1::g.247867::m.247867	1016.1	0.365076	0.148161	2.46404	0.0137379	0.244774
Gene.329750::CIGENEomyV6.81029.1::g.329750::m.329750	183.325	-0.358263	0.14544	-2.4633	0.0137664	0.244902
Gene.362035::CIGENEomyV6.92447.4::g.362035::m.362035	19.5457	0.686472	0.278657	2.4635	0.0137587	0.244902
Gene.72374::CIGENEomyV6.18225.4::g.72374::m.72374	1062.42	0.560365	0.227484	2.46331	0.0137659	0.244902
Gene.286820::CIGENEomyV6.69294.1::g.286820::m.286820	18.2462	0.660977	0.268375	2.46288	0.0137825	0.245061
Gene.286532::CIGENEomyV6.70364.2::g.286532::m.286532	307.314	0.402189	0.16336	2.46199	0.013817	0.245549
Gene.91269::CIGENEomyV6.22191.1::g.91269::m.91269	745.31	-0.479305	0.194756	-2.46106	0.0138529	0.246059
Gene.21665::CIGENEomyV6.7309.1::g.21665::m.21665	12.2321	-0.688693	0.279882	-2.46066	0.0138683	0.246207
Gene.189779::CIGENEomyV6.46053.1::g.189779::m.189779	195.299	0.513566	0.208757	2.46011	0.0138894	0.246454
Gene.182151::CIGENEomyV6.46498.1::g.182151::m.182151	123.097	-0.574089	0.233417	-2.4595	0.013913	0.24662
Gene.96082::CIGENEomyV6.25107.1::g.96082::m.96082	17.5415	0.66281	0.269482	2.45957	0.0139104	0.24662
Gene.107549::CIGENEomyV6.24984.1::g.107549::m.107549	2685.92	-0.409487	0.166626	-2.45753	0.0139896	0.247851
Gene.228094::CIGENEomyV6.55035.3::g.228094::m.228094	708.718	0.619033	0.251923	2.45723	0.0140012	0.247929
Gene.216125::CIGENEomyV6.52424.1::g.216125::m.216125	14.3473	-0.648123	0.263801	-2.45686	0.0140158	0.24806
Gene.333409::CIGENEomyV6.83640.2::g.333409::m.333409	4.91976	0.547227	0.222814	2.45598	0.01405	0.248539
Gene.136536::CIGENEomyV6.31689.1::g.136536::m.136536	32.9508	0.647492	0.263763	2.45482	0.0140953	0.249021
Gene.20834::CIGENEomyV6.4086.3::g.20834::m.20834	74.5072	-0.519912	0.211813	-2.45458	0.0141049	0.249021
Gene.231975::CIGENEomyV6.54630.1::g.231975::m.231975	174.232	-0.430059	0.175189	-2.45483	0.0140952	0.249021
Gene.84595::CIGENEomyV6.21826.17::g.84595::m.84595	1059.94	-0.524094	0.21352	-2.45455	0.0141061	0.249021
Gene.375441::CIGENEomyV6.102723.1::g.375441::m.375441	33.0559	0.682099	0.277929	2.45422	0.0141191	0.249123
Gene.138558::CIGENEomyV6.35772.1::g.138558::m.138558	49.2424	0.621718	0.253408	2.45343	0.0141502	0.249299
Gene.171665::CIGENEomyV6.41636.1::g.171665::m.171665	21.8108	0.685803	0.27953	2.45341	0.0141508	0.249299
Gene.295997::CIGENEomyV6.71045.1::g.295997::m.295997	473.616	-0.403037	0.164269	-2.45353	0.0141463	0.249299
Gene.216124::CIGENEomyV6.53604.1::g.216124::m.216124	373.428	-0.284518	0.115982	-2.45311	0.0141625	0.249379
Gene.69304::CIGENEomyV6.19169.1::g.69304::m.69304	19.5602	0.659312	0.268804	2.45276	0.0141765	0.249497
Gene.287951::CIGENEomyV6.69121.1::g.287951::m.287951	46.2961	-0.642496	0.262026	-2.45203	0.0142054	0.249856
Gene.360297::CIGENEomyV6.91078.4::g.360297::m.360297	47.2047	0.612621	0.249858	2.45188	0.0142113	0.249856
Gene.145640::CIGENEomyV6.34794.1::g.145640::m.145640	84.8355	0.565933	0.230946	2.4505	0.014266	0.250525
Gene.195697::CIGENEomyV6.46568.1::g.195697::m.195697	36.3672	0.606604	0.247575	2.45018	0.0142784	0.250525
Gene.215326::CIGENEomyV6.51717.5::g.215326::m.215326	171.342	0.547443	0.223415	2.45034	0.0142722	0.250525
Gene.53966::CIGENEomyV6.12873.1::g.53966::m.53966	2648.11	0.274413	0.111985	2.45045	0.0142677	0.250525
Gene.143564::CIGENEomyV6.34897.1::g.143564::m.143564	82.575	0.658317	0.268773	2.44934	0.0143119	0.2509
Gene.200370::CIGENEomyV6.48890.2::g.200370::m.200370	167.521	0.560087	0.228674	2.44928	0.0143143	0.2509
Gene.321693::CIGENEomyV6.77821.1::g.321693::m.321693	2219.12	-0.464763	0.189782	-2.44893	0.0143281	0.251014
Gene.116360::CIGENEomyV6.26751.3::g.116360::m.116360	21.3368	0.634458	0.259193	2.44782	0.0143722	0.251233
Gene.118360::CIGENEomyV6.27135.1::g.118360::m.118360	333.506	0.614017	0.250854	2.4477	0.014377	0.251233
Gene.138067::CIGENEomyV6.34682.2::g.138067::m.138067	286.463	-0.367712	0.150217	-2.44787	0.0143702	0.251233
Gene.302805::CIGENEomyV6.73502.3::g.302805::m.302805	77.0508	0.487569	0.19916	2.44813	0.0143599	0.251233
Gene.77786::CIGENEomyV6.17817.1::g.77786::m.77786	140.202	0.464704	0.189808	2.44828	0.0143541	0.251233
Gene.48535::CIGENEomyV6.11918.26::g.48535::m.48535	646.595	0.453637	0.185362	2.4473	0.014393	0.251386
Gene.30919::CIGENEomyV6.10679.1::g.30919::m.30919	19.7306	0.684335	0.279671	2.44693	0.0144078	0.251518
Gene.209949::CIGENEomyV6.49985.1::g.209949::m.209949	12.9536	-0.684854	0.279946	-2.44638	0.0144298	0.251775
Gene.216686::CIGENEomyV6.52156.1::g.216686::m.216686	584.741	-0.450289	0.184079	-2.44616	0.0144385	0.251799
Gene.60993::CIGENEomyV6.17655.1::g.60993::m.60993	425.144	0.436411	0.17842	2.44597	0.0144462	0.251806
Gene.154123::CIGENEomyV6.37306.2::g.154123::m.154123	3027.97	-0.35199	0.143951	-2.44521	0.0144769	0.252086
Gene.270653::CIGENEomyV6.64929.1::g.270653::m.270653	115.037	0.574621	0.234995	2.44525	0.0144752	0.252086
Gene.171355::CIGENEomyV6.42331.1::g.171355::m.171355	805.014	-0.38012	0.155473	-2.44492	0.0144882	0.252157
Gene.78621::CIGENEomyV6.21351.1::g.78621::m.78621	1147.96	-0.608193	0.248802	-2.44449	0.0145059	0.252337
Gene.175469::CIGENEomyV6.42091.2::g.175469::m.175469	5129.58	-0.507542	0.207663	-2.44407	0.0145227	0.252375
Gene.207016::CIGENEomyV6.50041.1::g.207016::m.207016	619.656	-0.308803	0.126341	-2.4442	0.0145174	0.252375
Gene.265853::CIGENEomyV6.65314.1::g.265853::m.265853	1698.22	0.413717	0.169346	2.44303	0.0145647	0.252977
Gene.346340::CIGENEomyV6.84288.1::g.346340::m.346340	155.708	-0.388945	0.159218	-2.44284	0.0145721	0.252979
Gene.231030::CIGENEomyV6.55536.1::g.231030::m.231030	160.392	0.6717	0.275016	2.4424	0.0145898	0.253159
Gene.238389::CIGENEomyV6.58812.3::g.238389::m.238389	48.382	-0.669528	0.274228	-2.4415	0.0146263	0.253577
Gene.310916::CIGENEomyV6.76347.1::g.310916::m.310916	78.6621	0.509874	0.208841	2.44145	0.0146286	0.253577
Gene.333561::CIGENEomyV6.83450.2::g.333561::m.333561	154.943	0.524646	0.21491	2.44124	0.014637	0.253596
Gene.160644::CIGENEomyV6.37434.1::g.160644::m.160644	711.914	-0.241805	0.0990668	-2.44082	0.0146538	0.253759
Gene.187504::CIGENEomyV6.46873.25::g.187504::m.187504	633.031	0.650192	0.266475	2.43997	0.0146885	0.254232
Gene.238076::CIGENEomyV6.59866.3::g.238076::m.238076	251.185	0.368584	0.15108	2.43967	0.0147009	0.254319
Gene.60184::CIGENEomyV6.14728.1::g.60184::m.60184	18.6715	-0.682838	0.279943	-2.4392	0.0147198	0.254519
Gene.1040::CIGENEomyV6.993.1::g.1040::m.1040	71.1052	0.481335	0.197404	2.43833	0.0147555	0.254594
[truncated: 40,089 more rows]

## Sheet: upregulated in smolts
Gene.315023::CIGENEomyV6.78087.1::g.315023::m.315023
Gene.347121::CIGENEomyV6.84590.1::g.347121::m.347121
Gene.311100::CIGENEomyV6.75810.3::g.311100::m.311100
Gene.780::CIGENEomyV6.2904.1::g.780::m.780
Gene.83416::CIGENEomyV6.22084.1::g.83416::m.83416
Gene.352742::CIGENEomyV6.87123.1::g.352742::m.352742
Gene.150914::CIGENEomyV6.39104.1::g.150914::m.150914
Gene.48630::CIGENEomyV6.13794.1::g.48630::m.48630
Gene.8413::CIGENEomyV6.1553.1::g.8413::m.8413
Gene.94322::CIGENEomyV6.25847.1::g.94322::m.94322
Gene.299419::CIGENEomyV6.74105.1::g.299419::m.299419
Gene.117332::CIGENEomyV6.26824.4::g.117332::m.117332
Gene.202204::CIGENEomyV6.50336.1::g.202204::m.202204
Gene.353603::CIGENEomyV6.87689.1::g.353603::m.353603
Gene.370060::CIGENEomyV6.98663.1::g.370060::m.370060
Gene.187547::CIGENEomyV6.46204.1::g.187547::m.187547
Gene.160388::CIGENEomyV6.38697.1::g.160388::m.160388
Gene.108358::CIGENEomyV6.29443.1::g.108358::m.108358
Gene.173297::CIGENEomyV6.42885.1::g.173297::m.173297
Gene.198156::CIGENEomyV6.48935.1::g.198156::m.198156
Gene.254581::CIGENEomyV6.63123.1::g.254581::m.254581
Gene.254597::CIGENEomyV6.62876.3::g.254597::m.254597
Gene.222284::CIGENEomyV6.56200.2::g.222284::m.222284
Gene.261617::CIGENEomyV6.62459.1::g.261617::m.261617
Gene.264738::CIGENEomyV6.66102.1::g.264738::m.264738
Gene.8104::CIGENEomyV6.386.1::g.8104::m.8104
Gene.121085::CIGENEomyV6.28531.1::g.121085::m.121085
Gene.281874::CIGENEomyV6.69604.2::g.281874::m.281874
Gene.130846::CIGENEomyV6.30417.1::g.130846::m.130846
Gene.55028::CIGENEomyV6.12506.1::g.55028::m.55028
Gene.4378::CIGENEomyV6.2169.1::g.4378::m.4378
Gene.317388::CIGENEomyV6.78989.1::g.317388::m.317388
Gene.67209::CIGENEomyV6.16894.1::g.67209::m.67209
Gene.251612::CIGENEomyV6.61242.1::g.251612::m.251612
Gene.141665::CIGENEomyV6.34822.1::g.141665::m.141665
Gene.144980::CIGENEomyV6.35187.1::g.144980::m.144980
Gene.242964::CIGENEomyV6.60053.1::g.242964::m.242964
Gene.328865::CIGENEomyV6.80429.1::g.328865::m.328865
Gene.61398::CIGENEomyV6.16831.1::g.61398::m.61398
Gene.313113::CIGENEomyV6.76793.1::g.313113::m.313113
Gene.213744::CIGENEomyV6.52386.1::g.213744::m.213744
Gene.286633::CIGENEomyV6.69535.1::g.286633::m.286633
Gene.10724::CIGENEomyV6.329.1::g.10724::m.10724
Gene.144495::CIGENEomyV6.34031.1::g.144495::m.144495
Gene.337736::CIGENEomyV6.82915.1::g.337736::m.337736
Gene.246966::CIGENEomyV6.59872.1::g.246966::m.246966
Gene.156094::CIGENEomyV6.38361.7::g.156094::m.156094
Gene.183016::CIGENEomyV6.45490.1::g.183016::m.183016
Gene.67646::CIGENEomyV6.16450.1::g.67646::m.67646
Gene.155932::CIGENEomyV6.39230.1::g.155932::m.155932
Gene.362734::CIGENEomyV6.93025.6::g.362734::m.362734
Gene.265827::CIGENEomyV6.66181.1::g.265827::m.265827
Gene.117312::CIGENEomyV6.27074.3::g.117312::m.117312
Gene.266345::CIGENEomyV6.64803.1::g.266345::m.266345
Gene.251346::CIGENEomyV6.62331.1::g.251346::m.251346
Gene.145738::CIGENEomyV6.35009.1::g.145738::m.145738
Gene.234381::CIGENEomyV6.56309.1::g.234381::m.234381
Gene.235206::CIGENEomyV6.55841.2::g.235206::m.235206
Gene.311639::CIGENEomyV6.75249.1::g.311639::m.311639
Gene.46071::CIGENEomyV6.9597.1::g.46071::m.46071
Gene.228666::CIGENEomyV6.56165.4::g.228666::m.228666
Gene.56295::CIGENEomyV6.13824.1::g.56295::m.56295
Gene.147764::CIGENEomyV6.34958.1::g.147764::m.147764
Gene.72260::CIGENEomyV6.15976.1::g.72260::m.72260
Gene.27542::CIGENEomyV6.6788.1::g.27542::m.27542
Gene.153956::CIGENEomyV6.37959.1::g.153956::m.153956
Gene.199255::CIGENEomyV6.48038.1::g.199255::m.199255
Gene.26366::CIGENEomyV6.6385.1::g.26366::m.26366
Gene.6602::CIGENEomyV6.2908.1::g.6602::m.6602
Gene.47319::CIGENEomyV6.13978.1::g.47319::m.47319
Gene.53597::CIGENEomyV6.14178.1::g.53597::m.53597
Gene.341574::CIGENEomyV6.84893.1::g.341574::m.341574
Gene.299119::CIGENEomyV6.73424.1::g.299119::m.299119
Gene.117738::CIGENEomyV6.29053.1::g.117738::m.117738
Gene.358300::CIGENEomyV6.89183.1::g.358300::m.358300
Gene.30248::CIGENEomyV6.10734.1::g.30248::m.30248
Gene.352270::CIGENEomyV6.87031.1::g.352270::m.352270
Gene.58217::CIGENEomyV6.12696.1::g.58217::m.58217
Gene.103503::CIGENEomyV6.25397.2::g.103503::m.103503
Gene.104344::CIGENEomyV6.25952.1::g.104344::m.104344
Gene.317411::CIGENEomyV6.77838.3::g.317411::m.317411
Gene.31816::CIGENEomyV6.10236.1::g.31816::m.31816
Gene.238055::CIGENEomyV6.58881.1::g.238055::m.238055
Gene.340725::CIGENEomyV6.85074.1::g.340725::m.340725
Gene.143710::CIGENEomyV6.34699.1::g.143710::m.143710
Gene.318226::CIGENEomyV6.78801.1::g.318226::m.318226
Gene.325090::CIGENEomyV6.78308.1::g.325090::m.325090
Gene.311119::CIGENEomyV6.75460.1::g.311119::m.311119
Gene.322324::CIGENEomyV6.78038.1::g.322324::m.322324
Gene.61672::CIGENEomyV6.18878.4::g.61672::m.61672
Gene.8366::CIGENEomyV6.2911.1::g.8366::m.8366
Gene.247654::CIGENEomyV6.58861.1::g.247654::m.247654
Gene.2780::CIGENEomyV6.2526.1::g.2780::m.2780
Gene.65073::CIGENEomyV6.18070.1::g.65073::m.65073
Gene.24183::CIGENEomyV6.5505.1::g.24183::m.24183
Gene.271943::CIGENEomyV6.65637.1::g.271943::m.271943
Gene.1975::CIGENEomyV6.545.1::g.1975::m.1975
Gene.357833::CIGENEomyV6.88845.2::g.357833::m.357833
Gene.44392::CIGENEomyV6.9900.1::g.44392::m.44392
Gene.294503::CIGENEomyV6.71542.1::g.294503::m.294503
Gene.47150::CIGENEomyV6.9495.1::g.47150::m.47150
Gene.114594::CIGENEomyV6.27016.1::g.114594::m.114594
Gene.277863::CIGENEomyV6.67055.6::g.277863::m.277863
Gene.325000::CIGENEomyV6.79607.2::g.325000::m.325000
Gene.116495::CIGENEomyV6.27396.1::g.116495::m.116495
Gene.370737::CIGENEomyV6.99098.1::g.370737::m.370737
Gene.147324::CIGENEomyV6.34590.1::g.147324::m.147324
Gene.209969::CIGENEomyV6.50512.1::g.209969::m.209969
Gene.2346::CIGENEomyV6.1402.12::g.2346::m.2346
Gene.160170::CIGENEomyV6.36771.1::g.160170::m.160170
Gene.165411::CIGENEomyV6.42481.1::g.165411::m.165411
Gene.213148::CIGENEomyV6.51740.1::g.213148::m.213148
Gene.218924::CIGENEomyV6.52460.1::g.218924::m.218924
Gene.275816::CIGENEomyV6.66873.1::g.275816::m.275816
Gene.18556::CIGENEomyV6.4964.1::g.18556::m.18556
Gene.282716::CIGENEomyV6.69311.1::g.282716::m.282716
Gene.292137::CIGENEomyV6.71298.1::g.292137::m.292137
Gene.29875::CIGENEomyV6.5284.1::g.29875::m.29875
Gene.327228::CIGENEomyV6.80863.1::g.327228::m.327228
Gene.243444::CIGENEomyV6.60632.1::g.243444::m.243444
Gene.368753::CIGENEomyV6.97641.1::g.368753::m.368753
Gene.67699::CIGENEomyV6.15591.1::g.67699::m.67699
Gene.152777::CIGENEomyV6.39174.1::g.152777::m.152777
Gene.257816::CIGENEomyV6.62500.1::g.257816::m.257816
Gene.302222::CIGENEomyV6.73682.1::g.302222::m.302222
Gene.125249::CIGENEomyV6.32446.1::g.125249::m.125249
Gene.107996::CIGENEomyV6.27445.1::g.107996::m.107996
Gene.165400::CIGENEomyV6.42324.1::g.165400::m.165400
Gene.235066::CIGENEomyV6.55815.1::g.235066::m.235066
Gene.341784::CIGENEomyV6.84727.1::g.341784::m.341784
Gene.33636::CIGENEomyV6.9580.1::g.33636::m.33636
Gene.281752::CIGENEomyV6.70493.2::g.281752::m.281752
Gene.123140::CIGENEomyV6.27305.1::g.123140::m.123140
Gene.180956::CIGENEomyV6.47103.2::g.180956::m.180956
Gene.305530::CIGENEomyV6.75633.1::g.305530::m.305530
Gene.327504::CIGENEomyV6.80946.1::g.327504::m.327504
Gene.310495::CIGENEomyV6.76279.1::g.310495::m.310495
Gene.302168::CIGENEomyV6.73095.1::g.302168::m.302168
Gene.214574::CIGENEomyV6.53720.2::g.214574::m.214574
Gene.159117::CIGENEomyV6.39035.1::g.159117::m.159117
Gene.196033::CIGENEomyV6.45622.1::g.196033::m.196033
Gene.91624::CIGENEomyV6.20834.1::g.91624::m.91624
Gene.48047::CIGENEomyV6.12446.1::g.48047::m.48047
Gene.152684::CIGENEomyV6.37188.1::g.152684::m.152684
Gene.282377::CIGENEomyV6.70069.1::g.282377::m.282377
Gene.301388::CIGENEomyV6.74143.8::g.301388::m.301388
Gene.312102::CIGENEomyV6.75000.2::g.312102::m.312102
Gene.15950::CIGENEomyV6.4487.2::g.15950::m.15950
Gene.247951::CIGENEomyV6.58510.1::g.247951::m.247951
Gene.18580::CIGENEomyV6.4509.1::g.18580::m.18580
Gene.281906::CIGENEomyV6.69328.1::g.281906::m.281906
Gene.202219::CIGENEomyV6.48503.2::g.202219::m.202219
Gene.85757::CIGENEomyV6.20883.2::g.85757::m.85757
Gene.28222::CIGENEomyV6.5849.2::g.28222::m.28222
Gene.133301::CIGENEomyV6.31254.1::g.133301::m.133301
Gene.213272::CIGENEomyV6.52191.1::g.213272::m.213272
Gene.358120::CIGENEomyV6.89034.1::g.358120::m.358120
Gene.70326::CIGENEomyV6.16578.1::g.70326::m.70326
Gene.160342::CIGENEomyV6.37817.1::g.160342::m.160342
Gene.222653::CIGENEomyV6.54792.1::g.222653::m.222653
Gene.153667::CIGENEomyV6.39231.1::g.153667::m.153667
Gene.54440::CIGENEomyV6.13091.1::g.54440::m.54440
Gene.113115::CIGENEomyV6.27240.1::g.113115::m.113115
Gene.343062::CIGENEomyV6.84861.1::g.343062::m.343062
Gene.59925::CIGENEomyV6.14282.1::g.59925::m.59925
Gene.239196::CIGENEomyV6.58088.1::g.239196::m.239196
Gene.260646::CIGENEomyV6.62339.1::g.260646::m.260646
Gene.287968::CIGENEomyV6.70361.1::g.287968::m.287968
Gene.363268::CIGENEomyV6.93481.2::g.363268::m.363268
Gene.189596::CIGENEomyV6.46170.1::g.189596::m.189596
Gene.279555::CIGENEomyV6.67106.2::g.279555::m.279555
Gene.278539::CIGENEomyV6.67624.1::g.278539::m.278539
Gene.218464::CIGENEomyV6.52511.1::g.218464::m.218464
Gene.287691::CIGENEomyV6.68954.1::g.287691::m.287691
Gene.349731::CIGENEomyV6.86812.1::g.349731::m.349731
Gene.71805::CIGENEomyV6.17679.1::g.71805::m.71805
Gene.139960::CIGENEomyV6.34680.3::g.139960::m.139960
Gene.285678::CIGENEomyV6.70334.2::g.285678::m.285678
Gene.94451::CIGENEomyV6.23368.1::g.94451::m.94451
Gene.245076::CIGENEomyV6.59400.1::g.245076::m.245076
Gene.232550::CIGENEomyV6.55457.1::g.232550::m.232550
Gene.233484::CIGENEomyV6.54946.1::g.233484::m.233484
Gene.262789::CIGENEomyV6.63234.1::g.262789::m.262789
Gene.114244::CIGENEomyV6.27112.3::g.114244::m.114244
Gene.364946::CIGENEomyV6.94800.1::g.364946::m.364946
Gene.194543::CIGENEomyV6.45478.1::g.194543::m.194543
Gene.215293::CIGENEomyV6.53219.1::g.215293::m.215293
Gene.36548::CIGENEomyV6.7513.1::g.36548::m.36548
Gene.250286::CIGENEomyV6.60361.1::g.250286::m.250286
Gene.134502::CIGENEomyV6.30534.1::g.134502::m.134502
Gene.307339::CIGENEomyV6.75133.1::g.307339::m.307339
Gene.222465::CIGENEomyV6.54703.2::g.222465::m.222465
Gene.73759::CIGENEomyV6.18079.1::g.73759::m.73759
Gene.143154::CIGENEomyV6.33466.1::g.143154::m.143154
Gene.218100::CIGENEomyV6.51258.1::g.218100::m.218100
Gene.181296::CIGENEomyV6.45124.1::g.181296::m.181296
Gene.29123::CIGENEomyV6.5830.2::g.29123::m.29123
Gene.36208::CIGENEomyV6.9986.4::g.36208::m.36208
Gene.128834::CIGENEomyV6.32725.1::g.128834::m.128834
Gene.371087::CIGENEomyV6.99425.1::g.371087::m.371087
Gene.123259::CIGENEomyV6.28837.1::g.123259::m.123259
Gene.338066::CIGENEomyV6.82276.4::g.338066::m.338066
Gene.226692::CIGENEomyV6.55781.1::g.226692::m.226692
Gene.286673::CIGENEomyV6.69976.2::g.286673::m.286673
Gene.193422::CIGENEomyV6.44775.1::g.193422::m.193422
Gene.322602::CIGENEomyV6.80050.1::g.322602::m.322602
Gene.106653::CIGENEomyV6.24492.1::g.106653::m.106653
Gene.214173::CIGENEomyV6.53202.1::g.214173::m.214173
Gene.308735::CIGENEomyV6.75014.1::g.308735::m.308735
Gene.83749::CIGENEomyV6.21646.1::g.83749::m.83749
Gene.115326::CIGENEomyV6.28349.1::g.115326::m.115326
Gene.160543::CIGENEomyV6.38887.1::g.160543::m.160543
Gene.30370::CIGENEomyV6.8285.1::g.30370::m.30370
Gene.277468::CIGENEomyV6.67504.1::g.277468::m.277468
Gene.330736::CIGENEomyV6.81659.1::g.330736::m.330736
Gene.370757::CIGENEomyV6.99139.1::g.370757::m.370757
Gene.14073::CIGENEomyV6.1265.1::g.14073::m.14073
Gene.91036::CIGENEomyV6.20419.2::g.91036::m.91036
Gene.174215::CIGENEomyV6.41034.1::g.174215::m.174215
Gene.134280::CIGENEomyV6.32182.1::g.134280::m.134280
Gene.224672::CIGENEomyV6.56614.1::g.224672::m.224672
Gene.241911::CIGENEomyV6.57445.3::g.241911::m.241911
Gene.238245::CIGENEomyV6.60189.2::g.238245::m.238245
Gene.111497::CIGENEomyV6.29653.5::g.111497::m.111497
Gene.168226::CIGENEomyV6.41785.4::g.168226::m.168226
Gene.106251::CIGENEomyV6.25222.1::g.106251::m.106251
Gene.368317::CIGENEomyV6.97326.1::g.368317::m.368317
Gene.220729::CIGENEomyV6.52736.1::g.220729::m.220729
Gene.302327::CIGENEomyV6.73433.1::g.302327::m.302327
Gene.70157::CIGENEomyV6.15731.1::g.70157::m.70157
Gene.8746::CIGENEomyV6.2266.1::g.8746::m.8746
Gene.240154::CIGENEomyV6.60295.1::g.240154::m.240154
Gene.92709::CIGENEomyV6.22152.1::g.92709::m.92709
Gene.14814::CIGENEomyV6.3952.1::g.14814::m.14814
Gene.361164::CIGENEomyV6.91748.1::g.361164::m.361164
Gene.287671::CIGENEomyV6.70511.1::g.287671::m.287671
Gene.303625::CIGENEomyV6.72794.1::g.303625::m.303625
Gene.258510::CIGENEomyV6.61023.6::g.258510::m.258510
Gene.369137::CIGENEomyV6.97901.2::g.369137::m.369137
Gene.195031::CIGENEomyV6.45084.1::g.195031::m.195031
Gene.315373::CIGENEomyV6.77726.1::g.315373::m.315373
Gene.339004::CIGENEomyV6.83183.3::g.339004::m.339004
Gene.137962::CIGENEomyV6.35546.3::g.137962::m.137962
Gene.285536::CIGENEomyV6.70231.1::g.285536::m.285536
Gene.151053::CIGENEomyV6.37942.1::g.151053::m.151053
Gene.165799::CIGENEomyV6.41164.1::g.165799::m.165799
Gene.57575::CIGENEomyV6.13851.3::g.57575::m.57575
Gene.4426::CIGENEomyV6.2718.11::g.4426::m.4426
Gene.324380::CIGENEomyV6.77288.1::g.324380::m.324380
Gene.322152::CIGENEomyV6.79113.1::g.322152::m.322152
Gene.118181::CIGENEomyV6.29208.5::g.118181::m.118181
Gene.369684::CIGENEomyV6.98388.1::g.369684::m.369684
Gene.28462::CIGENEomyV6.4607.2::g.28462::m.28462
Gene.374050::CIGENEomyV6.101623.1::g.374050::m.374050
Gene.320525::CIGENEomyV6.78059.1::g.320525::m.320525
Gene.46894::CIGENEomyV6.8556.1::g.46894::m.46894
Gene.312329::CIGENEomyV6.75513.1::g.312329::m.312329
Gene.271306::CIGENEomyV6.65425.1::g.271306::m.271306
Gene.147776::CIGENEomyV6.36066.1::g.147776::m.147776
Gene.149558::CIGENEomyV6.35814.1::g.149558::m.149558
Gene.15471::CIGENEomyV6.5822.1::g.15471::m.15471
Gene.232993::CIGENEomyV6.55171.1::g.232993::m.232993
Gene.302105::CIGENEomyV6.73105.1::g.302105::m.302105
Gene.180979::CIGENEomyV6.43739.1::g.180979::m.180979
Gene.87899::CIGENEomyV6.21503.2::g.87899::m.87899
Gene.41401::CIGENEomyV6.9154.1::g.41401::m.41401
Gene.211774::CIGENEomyV6.52632.1::g.211774::m.211774
Gene.14709::CIGENEomyV6.4459.1::g.14709::m.14709
Gene.180249::CIGENEomyV6.40440.2::g.180249::m.180249
Gene.239761::CIGENEomyV6.58377.1::g.239761::m.239761
Gene.78638::CIGENEomyV6.21450.1::g.78638::m.78638
Gene.223267::CIGENEomyV6.55798.1::g.223267::m.223267
Gene.294189::CIGENEomyV6.72570.1::g.294189::m.294189
Gene.60541::CIGENEomyV6.14979.1::g.60541::m.60541
Gene.126966::CIGENEomyV6.32036.1::g.126966::m.126966
Gene.153038::CIGENEomyV6.38599.9::g.153038::m.153038
Gene.181320::CIGENEomyV6.44215.10::g.181320::m.181320
Gene.221581::CIGENEomyV6.54559.1::g.221581::m.221581
Gene.249609::CIGENEomyV6.59823.1::g.249609::m.249609
Gene.312189::CIGENEomyV6.75044.2::g.312189::m.312189
Gene.132279::CIGENEomyV6.33046.1::g.132279::m.132279
Gene.166331::CIGENEomyV6.41503.1::g.166331::m.166331
Gene.267277::CIGENEomyV6.65999.3::g.267277::m.267277
Gene.67561::CIGENEomyV6.17251.1::g.67561::m.67561
Gene.279927::CIGENEomyV6.68232.1::g.279927::m.279927
Gene.13784::CIGENEomyV6.1962.1::g.13784::m.13784
Gene.196452::CIGENEomyV6.46117.1::g.196452::m.196452
Gene.321340::CIGENEomyV6.77017.1::g.321340::m.321340
Gene.80104::CIGENEomyV6.20559.1::g.80104::m.80104
Gene.61792::CIGENEomyV6.16444.2::g.61792::m.61792
Gene.203149::CIGENEomyV6.50034.1::g.203149::m.203149
Gene.92849::CIGENEomyV6.20077.2::g.92849::m.92849
Gene.113401::CIGENEomyV6.28846.1::g.113401::m.113401
Gene.273692::CIGENEomyV6.64918.1::g.273692::m.273692
Gene.84168::CIGENEomyV6.21161.1::g.84168::m.84168
Gene.13836::CIGENEomyV6.618.1::g.13836::m.13836
Gene.310760::CIGENEomyV6.74914.1::g.310760::m.310760
Gene.133145::CIGENEomyV6.31707.1::g.133145::m.133145
Gene.270675::CIGENEomyV6.65083.1::g.270675::m.270675
Gene.353483::CIGENEomyV6.86421.1::g.353483::m.353483
Gene.334468::CIGENEomyV6.82479.1::g.334468::m.334468
Gene.325925::CIGENEomyV6.80970.1::g.325925::m.325925
Gene.225464::CIGENEomyV6.57218.1::g.225464::m.225464
Gene.268369::CIGENEomyV6.65768.1::g.268369::m.268369
Gene.64415::CIGENEomyV6.16948.1::g.64415::m.64415
Gene.97896::CIGENEomyV6.24404.1::g.97896::m.97896
Gene.106787::CIGENEomyV6.23807.1::g.106787::m.106787
Gene.296856::CIGENEomyV6.71412.1::g.296856::m.296856
Gene.350177::CIGENEomyV6.85714.1::g.350177::m.350177
Gene.110184::CIGENEomyV6.29448.16::g.110184::m.110184
Gene.204279::CIGENEomyV6.48973.1::g.204279::m.204279
Gene.304974::CIGENEomyV6.73933.2::g.304974::m.304974
Gene.240037::CIGENEomyV6.58182.2::g.240037::m.240037
Gene.353926::CIGENEomyV6.87350.1::g.353926::m.353926
Gene.226652::CIGENEomyV6.54963.1::g.226652::m.226652
Gene.153794::CIGENEomyV6.39299.1::g.153794::m.153794
Gene.165991::CIGENEomyV6.40363.5::g.165991::m.165991
Gene.291176::CIGENEomyV6.71493.1::g.291176::m.291176
Gene.70535::CIGENEomyV6.17550.3::g.70535::m.70535
Gene.343761::CIGENEomyV6.84617.1::g.343761::m.343761
Gene.291530::CIGENEomyV6.72646.1::g.291530::m.291530
Gene.26675::CIGENEomyV6.5119.1::g.26675::m.26675
Gene.24139::CIGENEomyV6.3616.3::g.24139::m.24139
Gene.295060::CIGENEomyV6.71944.1::g.295060::m.295060
Gene.172583::CIGENEomyV6.41867.2::g.172583::m.172583
Gene.154802::CIGENEomyV6.38499.1::g.154802::m.154802
Gene.21427::CIGENEomyV6.3581.1::g.21427::m.21427
Gene.224275::CIGENEomyV6.55983.1::g.224275::m.224275
Gene.195641::CIGENEomyV6.45071.1::g.195641::m.195641
Gene.112770::CIGENEomyV6.26676.2::g.112770::m.112770
Gene.244537::CIGENEomyV6.59944.1::g.244537::m.244537
Gene.233846::CIGENEomyV6.56395.1::g.233846::m.233846
Gene.190437::CIGENEomyV6.47091.1::g.190437::m.190437
Gene.159133::CIGENEomyV6.37288.1::g.159133::m.159133
Gene.289418::CIGENEomyV6.69553.1::g.289418::m.289418
Gene.186536::CIGENEomyV6.45980.2::g.186536::m.186536
Gene.279061::CIGENEomyV6.66836.1::g.279061::m.279061
Gene.126666::CIGENEomyV6.32085.2::g.126666::m.126666
Gene.26146::CIGENEomyV6.4586.1::g.26146::m.26146
Gene.365961::CIGENEomyV6.95671.1::g.365961::m.365961
Gene.114240::CIGENEomyV6.26581.1::g.114240::m.114240
Gene.73086::CIGENEomyV6.17297.2::g.73086::m.73086
Gene.105268::CIGENEomyV6.25002.1::g.105268::m.105268
Gene.339528::CIGENEomyV6.82583.2::g.339528::m.339528
Gene.369721::CIGENEomyV6.98416.1::g.369721::m.369721
Gene.205004::CIGENEomyV6.50516.1::g.205004::m.205004
Gene.66311::CIGENEomyV6.16884.1::g.66311::m.66311
Gene.78763::CIGENEomyV6.20842.1::g.78763::m.78763
Gene.3986::CIGENEomyV6.1469.1::g.3986::m.3986
Gene.166968::CIGENEomyV6.42946.3::g.166968::m.166968
Gene.280041::CIGENEomyV6.67848.3::g.280041::m.280041
Gene.9536::CIGENEomyV6.3335.1::g.9536::m.9536
Gene.66907::CIGENEomyV6.18719.3::g.66907::m.66907
Gene.291330::CIGENEomyV6.71002.1::g.291330::m.291330
Gene.54262::CIGENEomyV6.14050.1::g.54262::m.54262
Gene.332129::CIGENEomyV6.80904.1::g.332129::m.332129
Gene.18681::CIGENEomyV6.6614.3::g.18681::m.18681
Gene.17936::CIGENEomyV6.7310.1::g.17936::m.17936
Gene.332571::CIGENEomyV6.82272.1::g.332571::m.332571
Gene.47118::CIGENEomyV6.10282.1::g.47118::m.47118
Gene.319791::CIGENEomyV6.77765.2::g.319791::m.319791
Gene.251951::CIGENEomyV6.61681.2::g.251951::m.251951
Gene.289453::CIGENEomyV6.70348.2::g.289453::m.289453
Gene.366680::CIGENEomyV6.96130.1::g.366680::m.366680
Gene.298294::CIGENEomyV6.71173.1::g.298294::m.298294
Gene.52908::CIGENEomyV6.13958.3::g.52908::m.52908
Gene.316492::CIGENEomyV6.78724.6::g.316492::m.316492

## Sheet: upregulated in residents
Gene.231945::CIGENEomyV6.55417.4::g.231945::m.231945
Gene.171784::CIGENEomyV6.41911.1::g.171784::m.171784
Gene.40600::CIGENEomyV6.9350.2::g.40600::m.40600
Gene.217939::CIGENEomyV6.51530.2::g.217939::m.217939
Gene.63684::CIGENEomyV6.16779.1::g.63684::m.63684
Gene.325087::CIGENEomyV6.76933.1::g.325087::m.325087
Gene.143552::CIGENEomyV6.34767.1::g.143552::m.143552
Gene.369572::CIGENEomyV6.98267.10::g.369572::m.369572
Gene.256253::CIGENEomyV6.61572.1::g.256253::m.256253
Gene.1029::CIGENEomyV6.2550.1::g.1029::m.1029
Gene.223662::CIGENEomyV6.56162.5::g.223662::m.223662
Gene.330978::CIGENEomyV6.80999.1::g.330978::m.330978
Gene.29756::CIGENEomyV6.3716.1::g.29756::m.29756
Gene.200736::CIGENEomyV6.48949.17::g.200736::m.200736
Gene.163315::CIGENEomyV6.40683.1::g.163315::m.163315
Gene.10205::CIGENEomyV6.1886.1::g.10205::m.10205
Gene.44279::CIGENEomyV6.9153.1::g.44279::m.44279
Gene.376805::CIGENEomyV6.103849.1::g.376805::m.376805
Gene.8006::CIGENEomyV6.2540.1::g.8006::m.8006
Gene.95684::CIGENEomyV6.24916.1::g.95684::m.95684
Gene.129120::CIGENEomyV6.31970.1::g.129120::m.129120
Gene.194659::CIGENEomyV6.47112.1::g.194659::m.194659
Gene.194533::CIGENEomyV6.47111.1::g.194533::m.194533
Gene.40017::CIGENEomyV6.10609.1::g.40017::m.40017
Gene.120450::CIGENEomyV6.30020.1::g.120450::m.120450
Gene.44471::CIGENEomyV6.10047.1::g.44471::m.44471
Gene.78634::CIGENEomyV6.21688.1::g.78634::m.78634
Gene.111505::CIGENEomyV6.27986.1::g.111505::m.111505
Gene.274694::CIGENEomyV6.67290.1::g.274694::m.274694
Gene.278419::CIGENEomyV6.67276.1::g.278419::m.278419
Gene.375117::CIGENEomyV6.102452.1::g.375117::m.375117
Gene.213652::CIGENEomyV6.53093.2::g.213652::m.213652
Gene.106246::CIGENEomyV6.25573.1::g.106246::m.106246
Gene.110893::CIGENEomyV6.30092.2::g.110893::m.110893
Gene.128635::CIGENEomyV6.30383.1::g.128635::m.128635
Gene.32386::CIGENEomyV6.9255.1::g.32386::m.32386
Gene.242351::CIGENEomyV6.57456.1::g.242351::m.242351
Gene.228757::CIGENEomyV6.54878.1::g.228757::m.228757
Gene.1301::CIGENEomyV6.682.1::g.1301::m.1301
Gene.210683::CIGENEomyV6.48532.1::g.210683::m.210683
Gene.245963::CIGENEomyV6.59812.1::g.245963::m.245963
Gene.44096::CIGENEomyV6.8136.1::g.44096::m.44096
Gene.180679::CIGENEomyV6.42019.2::g.180679::m.180679
Gene.84314::CIGENEomyV6.20578.1::g.84314::m.84314
Gene.111463::CIGENEomyV6.27834.1::g.111463::m.111463
Gene.226911::CIGENEomyV6.56102.5::g.226911::m.226911
Gene.227108::CIGENEomyV6.55664.4::g.227108::m.227108
Gene.291244::CIGENEomyV6.71082.1::g.291244::m.291244
Gene.27383::CIGENEomyV6.4847.2::g.27383::m.27383
Gene.43675::CIGENEomyV6.10082.2::g.43675::m.43675
Gene.52116::CIGENEomyV6.14590.1::g.52116::m.52116
Gene.228860::CIGENEomyV6.55572.1::g.228860::m.228860
Gene.111804::CIGENEomyV6.27539.1::g.111804::m.111804
Gene.72117::CIGENEomyV6.18553.1::g.72117::m.72117
Gene.86002::CIGENEomyV6.22210.1::g.86002::m.86002
Gene.239793::CIGENEomyV6.60305.2::g.239793::m.239793
Gene.287394::CIGENEomyV6.68633.1::g.287394::m.287394
Gene.159135::CIGENEomyV6.37935.1::g.159135::m.159135
Gene.43543::CIGENEomyV6.7447.13::g.43543::m.43543
Gene.135711::CIGENEomyV6.30382.1::g.135711::m.135711
Gene.176729::CIGENEomyV6.42438.1::g.176729::m.176729
Gene.20210::CIGENEomyV6.3706.1::g.20210::m.20210
Gene.277989::CIGENEomyV6.67861.1::g.277989::m.277989
Gene.169550::CIGENEomyV6.42436.3::g.169550::m.169550
Gene.248278::CIGENEomyV6.58521.1::g.248278::m.248278
Gene.41038::CIGENEomyV6.10861.3::g.41038::m.41038
Gene.323472::CIGENEomyV6.79117.1::g.323472::m.323472
Gene.24855::CIGENEomyV6.4033.1::g.24855::m.24855
Gene.311558::CIGENEomyV6.75343.1::g.311558::m.311558
Gene.147300::CIGENEomyV6.35717.1::g.147300::m.147300
Gene.247329::CIGENEomyV6.59629.1::g.247329::m.247329
Gene.362085::CIGENEomyV6.92467.1::g.362085::m.362085
Gene.313182::CIGENEomyV6.78359.1::g.313182::m.313182
Gene.139138::CIGENEomyV6.34648.1::g.139138::m.139138
Gene.66114::CIGENEomyV6.17849.1::g.66114::m.66114
Gene.4209::CIGENEomyV6.3348.1::g.4209::m.4209
Gene.154556::CIGENEomyV6.38099.1::g.154556::m.154556
Gene.81784::CIGENEomyV6.21141.1::g.81784::m.81784
Gene.82556::CIGENEomyV6.22624.6::g.82556::m.82556
Gene.281480::CIGENEomyV6.68386.1::g.281480::m.281480
Gene.270132::CIGENEomyV6.66127.2::g.270132::m.270132
Gene.289067::CIGENEomyV6.69100.1::g.289067::m.289067
Gene.237352::CIGENEomyV6.57599.1::g.237352::m.237352
Gene.85576::CIGENEomyV6.21866.2::g.85576::m.85576
Gene.30400::CIGENEomyV6.10163.1::g.30400::m.30400
Gene.160537::CIGENEomyV6.38039.1::g.160537::m.160537
Gene.137596::CIGENEomyV6.32655.1::g.137596::m.137596
Gene.237045::CIGENEomyV6.58290.1::g.237045::m.237045
Gene.126425::CIGENEomyV6.31914.1::g.126425::m.126425
Gene.25118::CIGENEomyV6.3562.3::g.25118::m.25118
Gene.320623::CIGENEomyV6.79423.1::g.320623::m.320623
Gene.322993::CIGENEomyV6.79028.1::g.322993::m.322993
Gene.303104::CIGENEomyV6.74095.1::g.303104::m.303104
Gene.233225::CIGENEomyV6.54529.1::g.233225::m.233225
Gene.320118::CIGENEomyV6.78143.3::g.320118::m.320118
Gene.327169::CIGENEomyV6.80286.1::g.327169::m.327169
Gene.224958::CIGENEomyV6.56774.1::g.224958::m.224958
Gene.52586::CIGENEomyV6.14726.1::g.52586::m.52586
Gene.111434::CIGENEomyV6.28729.1::g.111434::m.111434
Gene.116706::CIGENEomyV6.29842.1::g.116706::m.116706
Gene.264589::CIGENEomyV6.64156.2::g.264589::m.264589
Gene.202823::CIGENEomyV6.47688.1::g.202823::m.202823
Gene.162746::CIGENEomyV6.38526.1::g.162746::m.162746
Gene.276831::CIGENEomyV6.67588.1::g.276831::m.276831
Gene.158644::CIGENEomyV6.37753.1::g.158644::m.158644
Gene.350882::CIGENEomyV6.87184.1::g.350882::m.350882
Gene.90325::CIGENEomyV6.20402.1::g.90325::m.90325
Gene.98899::CIGENEomyV6.24034.2::g.98899::m.98899
Gene.677::CIGENEomyV6.1461.3::g.677::m.677
Gene.253437::CIGENEomyV6.61526.1::g.253437::m.253437
Gene.108036::CIGENEomyV6.28902.1::g.108036::m.108036
Gene.270724::CIGENEomyV6.65857.1::g.270724::m.270724
Gene.356284::CIGENEomyV6.86907.1::g.356284::m.356284
Gene.152641::CIGENEomyV6.37945.1::g.152641::m.152641
Gene.121324::CIGENEomyV6.28545.1::g.121324::m.121324
Gene.149326::CIGENEomyV6.34769.4::g.149326::m.149326
Gene.210261::CIGENEomyV6.50084.1::g.210261::m.210261
Gene.277521::CIGENEomyV6.68278.1::g.277521::m.277521
Gene.351553::CIGENEomyV6.87212.1::g.351553::m.351553
Gene.351673::CIGENEomyV6.86415.1::g.351673::m.351673
Gene.98642::CIGENEomyV6.24717.1::g.98642::m.98642
Gene.222949::CIGENEomyV6.56940.1::g.222949::m.222949
Gene.180432::CIGENEomyV6.42916.1::g.180432::m.180432
Gene.228758::CIGENEomyV6.55535.1::g.228758::m.228758
Gene.375790::CIGENEomyV6.103068.1::g.375790::m.375790
Gene.88881::CIGENEomyV6.21420.4::g.88881::m.88881
Gene.8575::CIGENEomyV6.3319.1::g.8575::m.8575
Gene.324382::CIGENEomyV6.77554.1::g.324382::m.324382
Gene.41786::CIGENEomyV6.10240.1::g.41786::m.41786
Gene.23463::CIGENEomyV6.6448.1::g.23463::m.23463
Gene.331479::CIGENEomyV6.80438.1::g.331479::m.331479
Gene.146534::CIGENEomyV6.33643.1::g.146534::m.146534
Gene.322904::CIGENEomyV6.79733.2::g.322904::m.322904
Gene.271086::CIGENEomyV6.64995.1::g.271086::m.271086
Gene.337760::CIGENEomyV6.81889.1::g.337760::m.337760
Gene.345664::CIGENEomyV6.84447.1::g.345664::m.345664
Gene.121787::CIGENEomyV6.27960.1::g.121787::m.121787
Gene.25848::CIGENEomyV6.5978.2::g.25848::m.25848
Gene.255998::CIGENEomyV6.62796.1::g.255998::m.255998
Gene.46747::CIGENEomyV6.10279.1::g.46747::m.46747
Gene.285742::CIGENEomyV6.70711.1::g.285742::m.285742
Gene.340799::CIGENEomyV6.83926.2::g.340799::m.340799
Gene.194929::CIGENEomyV6.45744.2::g.194929::m.194929
Gene.9003::CIGENEomyV6.272.3::g.9003::m.9003
Gene.165116::CIGENEomyV6.40390.5::g.165116::m.165116
Gene.195388::CIGENEomyV6.47089.1::g.195388::m.195388
Gene.4358::CIGENEomyV6.99.2::g.4358::m.4358
Gene.115187::CIGENEomyV6.26547.2::g.115187::m.115187
Gene.15458::CIGENEomyV6.4471.2::g.15458::m.15458
Gene.298404::CIGENEomyV6.71225.1::g.298404::m.298404
Gene.343138::CIGENEomyV6.85296.1::g.343138::m.343138
Gene.75054::CIGENEomyV6.17305.1::g.75054::m.75054
Gene.186768::CIGENEomyV6.46183.1::g.186768::m.186768
Gene.243723::CIGENEomyV6.58228.1::g.243723::m.243723
Gene.10092::CIGENEomyV6.980.1::g.10092::m.10092
Gene.183993::CIGENEomyV6.47265.1::g.183993::m.183993
Gene.150750::CIGENEomyV6.36616.1::g.150750::m.150750
Gene.32792::CIGENEomyV6.10085.1::g.32792::m.32792
Gene.351670::CIGENEomyV6.85825.1::g.351670::m.351670
Gene.361031::CIGENEomyV6.91663.1::g.361031::m.361031
Gene.57282::CIGENEomyV6.12942.2::g.57282::m.57282
Gene.9785::CIGENEomyV6.705.2::g.9785::m.9785
Gene.356818::CIGENEomyV6.88099.1::g.356818::m.356818
Gene.35470::CIGENEomyV6.9230.2::g.35470::m.35470
Gene.60183::CIGENEomyV6.12941.1::g.60183::m.60183
Gene.251571::CIGENEomyV6.61545.2::g.251571::m.251571
Gene.159707::CIGENEomyV6.37601.3::g.159707::m.159707
Gene.316657::CIGENEomyV6.78961.2::g.316657::m.316657
Gene.87720::CIGENEomyV6.19815.1::g.87720::m.87720
Gene.251506::CIGENEomyV6.62422.3::g.251506::m.251506
Gene.71432::CIGENEomyV6.17495.12::g.71432::m.71432
Gene.291038::CIGENEomyV6.72671.1::g.291038::m.291038
Gene.128266::CIGENEomyV6.32755.1::g.128266::m.128266
Gene.295863::CIGENEomyV6.71425.1::g.295863::m.295863
Gene.339517::CIGENEomyV6.82151.1::g.339517::m.339517
Gene.253462::CIGENEomyV6.60902.1::g.253462::m.253462
Gene.261072::CIGENEomyV6.63228.1::g.261072::m.261072
Gene.123586::CIGENEomyV6.31895.1::g.123586::m.123586
Gene.181989::CIGENEomyV6.45117.1::g.181989::m.181989
Gene.29909::CIGENEomyV6.4688.1::g.29909::m.29909
Gene.104846::CIGENEomyV6.26358.1::g.104846::m.104846
Gene.14574::CIGENEomyV6.6466.12::g.14574::m.14574
Gene.340682::CIGENEomyV6.84460.1::g.340682::m.340682
Gene.161539::CIGENEomyV6.38691.1::g.161539::m.161539
Gene.28656::CIGENEomyV6.6391.1::g.28656::m.28656
Gene.41318::CIGENEomyV6.8659.3::g.41318::m.41318
Gene.274414::CIGENEomyV6.66942.1::g.274414::m.274414
Gene.131007::CIGENEomyV6.32753.1::g.131007::m.131007
Gene.177580::CIGENEomyV6.42407.1::g.177580::m.177580
Gene.258897::CIGENEomyV6.62387.1::g.258897::m.258897
Gene.325505::CIGENEomyV6.77118.1::g.325505::m.325505
Gene.175694::CIGENEomyV6.40791.1::g.175694::m.175694
Gene.249738::CIGENEomyV6.58964.1::g.249738::m.249738
Gene.267983::CIGENEomyV6.65438.1::g.267983::m.267983
Gene.314774::CIGENEomyV6.76527.1::g.314774::m.314774
Gene.301824::CIGENEomyV6.73517.1::g.301824::m.301824
Gene.326257::CIGENEomyV6.80996.1::g.326257::m.326257
Gene.334535::CIGENEomyV6.81780.1::g.334535::m.334535
Gene.350071::CIGENEomyV6.86410.1::g.350071::m.350071
Gene.287766::CIGENEomyV6.68474.1::g.287766::m.287766
Gene.71800::CIGENEomyV6.18727.1::g.71800::m.71800
Gene.361621::CIGENEomyV6.92101.1::g.361621::m.361621
Gene.376148::CIGENEomyV6.103395.2::g.376148::m.376148
Gene.52988::CIGENEomyV6.14971.1::g.52988::m.52988
Gene.166901::CIGENEomyV6.43092.1::g.166901::m.166901
Gene.128126::CIGENEomyV6.31997.1::g.128126::m.128126
Gene.334899::CIGENEomyV6.82248.1::g.334899::m.334899
Gene.93329::CIGENEomyV6.22466.1::g.93329::m.93329
Gene.258692::CIGENEomyV6.61772.1::g.258692::m.258692
